# Supplementary material for: Comprehensive analysis of nasal IgA antibodies induced by intranasal administration of the SARS-CoV-2 spike protein
Source: bioRxiv preprint, doi:10.1101/2023.04.10.536311, version 3 (2024-12-20)
Supplement: Supplemental Table [file 536311_file04.xlsx]

## Sheet: No.1 mouse
クローン番号	Clone No	Type	Group	Class	VH-D-J sequence	Top VH match	Top D match	Top D match	VH mismatche	FW1	CDR1	FW2	CDR2	FW3	CDR3	VK-J sequence	Top VK match	Top J match	VK mismatche	FW1	CDR1	FW2	CDR2	FW3	CDR3
1	N205	1	1	IgA	ATGTCCTCTCCACAATCCCTGAAGACACGGACTCTAACTATGGGATGGAACTGGATCTTTATTTTAATCCTGTCAGTAACTACAGGTGTCCACTCTGAGGTCCAGCTGCAGCAGTCTGGACCTGAACTGGTGAGGCCTGGGGCTTCAGTGAAGATATCCTGCAAGGCTTCTGGTTACTCATTCACTGGCTACTACATGCACTGGGTGAAACAAAGTCCTGAAAAGAGCCTTGAGTGGATTGGAGAGATTAATCCTAGCACTGGTGGTATTACTTATAACCAGAAGTTCAAGGCCAAGGCCACATTGACTGTAGACAAATCCTCCAGTACAGCCTACATGCAGCTCACGAGCCTGACATCTGAGGACTCTGCAGTCTATTACTGTGCAAGACGTTATATG…	IGHV1-42*01	IGHD1-3*01	IGHJ2*01	9	97.3	100	96.1	95.8	96.5	100	ATGAGACCCTCCATTCAGTTCCTGGGGCTCTTGTTGTTCTGGCTTCATGGTTCTCAGTGTGACATCCAGATGACACAGTCTCCATCCTCACTGTCTGCATCTCTGGGAGGCAAAGTCACCTTCACTTGCAAGGCAAGCCAAGACATTAACAAGAATATAGCTTGGTACCAAGACAAGCCTGGAAAAGGTCCTAGGCTGCTCATATGGTACACATCTACATTACAGCCAGGCATCCCATCAAGGTTCAGTGGAAGTGGGTCTGGGAGAGATTATTCCTTCAGCATCAGCAACCTGGAACCTGAAGATATTGCAACTTATTACTGTCTACAGTATGATAATCTTCCGTATACGTTCGGATCGGGGACCAAGCTGGAAATAAAACGG	IGKV19-93*01	IGKJ2*03	8	98.7	94.4	92.2	100	98.1	100
2	N107	1	2	IgA	ATGGCTGTCCTGGCGCTACTCCTCTGCCTGATGACTTTCCCAAGCTGTGCCCTGTCCCAGGTGCAGCTGAAGGAGTCAGGACCTGGCCTGGTGGCGCCCTCACAGAGCCTGTCCATCACATGCACTGTCTCTGGGTTCTCATTAACCAACTATGCTATAAGCTGGGTTCGCCAGCCACCAGGAAAGGGTCTGGAGTGGCTTGGAATAATATGGACTGGTGGAGGCACAAATTATAATTCAGCTCTCAAATCCAGACTGAACATCAGCAAAGACAGCTCCAAGAGTCAAGTTTTCTTAAAAATGAACAGTCTGCAAACTGATGACACAGCCAGGTACTACTGTGCCAGGTTTAGTTACTATAGTTATCCCTATACTATGGACTACTGGGGTCAAGGAACC…	IGHV2-9-1*01	IGHD2-12*01	IGHJ4*01	4	100	95.8	98	100	98.2	100	ATGATGAGTCCTGCCCAGTTCCTGTTTCTGCTAGTGCTCTCGATTCAGGAAACCAATGGTGATGTTGTGATGATCCAGACTCCACTGTCTTTGTCGGTTACCATTGGACAACCAGCCTCCATCTCTTGCAAGTCAAGTCAGAGCCTCTTACATAGTGATGGAAAGACATATTTGAATTGGTTATTACAGAGGCCAGGCCAGTCTCCAAAGCTCCTAATCTATCTGGTGTCTAAACTGGAATCTGGCATCCCTGACAGGGTCAGTGGCAGTGGATCAGGGACAGATTTCACACTGAAAATCAGCAGAGTGGAGGTTGAGGATTTGGGAGTTTATTACTGCTTGCAACATACACATTTTCCTCACACGTTCGGTGCTGGGACCAAGCTGGAGCTGAAACGG	IGKV1-135*01	IGKJ5*01	16	96.2	97	96.1	100	93.5	87
3	N219	1	2	IgA	ATGGCTGTCCTGGCGCTACTCCTCTGCCTGATGACTTTCCCAAGCTGTGCCCTGTCCCAGGTGCAGCTGAAGGAGTCAGGACCTGGCCTGGTGGCGCCCTCACAGAGCCTGTCCATCACATGCACTGTCTCTGGGTTCTCGTTAACCAACTATGCTATAAGCTGGGTTCGCCAGCCACCAGGAAAGGGTCTGGAGTGGCTTGGAGTAATATGGACTGGTGGAGGCACAAATTATAATTCAGCTCTCAAATCCAGACTGAGCATCAGCAAAGACAGCTCCAAGAGTCAAGTTTTCTTAAAAATGAACAGTCTGCAAACTGATGACACAGCCAGGTACTACTGTGCCAGGTTTAGTTACTATAGTTATCCCTATGCTATGGACTACTGGGGTCAAGGAACC…	IGHV2-9-1*01	IGHD2-12*01	IGHJ4*01	3	100	91.7	100	100	99.1	100	ATGATGAGTCCTGCCCAGTTCCTGTTTCTGCTAGTGCTCTCGATTCAGGAAACCAATGGTGATGTTGTGATGATCCAGACTCCACTGTCTTTGTCGGTTACCATTGGACAACCAGCCTCCATCTCTTGCAAGTCAAGTCAGAGCCTCTTACATAGTGATGGAAAGACATATTTGAATTGGTTATTACAGAGGCCAGGCCAGTCTCCAAAGCTCCTAATCTATCTGGTGTCTAAACTGGAATCTGGCATCCCTGACAGGGTCAGTGGCAGTGGATCAGGGACAGATTTCACACTGAAAATCAGCAGAGTGGAGGTTGAGGATTTGGGAGTTTATTACTGCTTGCAACATACACATTTTCCTCACACGTTCGGTGCTGGGACCAAGCTGGAGCTGAAACGG	IGKV1-135*01	IGKJ5*01	16	96.2	97	96.1	100	93.5	87
4	N226	1	2	IgA	ATGGCTGTCCTGGCGCTACTCCTCTGCCTGATGACTTTCCCAAGCTGTGCCCTGTCCCAGGTGCAGCTGAAGGAGTCAGGACCTGGCCTGGTGGCGCCCTCACAGAGCCTGTCCATCACATGCACTGTCTCTGGCTTCTCATTAATCAATTATGCTATAACCTGGGTTCGCCAGCCACCAGGAAAGGGTCTGGAATGGCTTGGACTAATATGGACTGGTGGAGGCACAAATTATAATTCAGCTCTCAAATCCAGACTGAGCATCAGCAAAGACAGCTCCAAGAGTCAAGTTTTCTTAAAAATGAACAGTCTGCAAACTGATGACACAGCCAGGTACTACTGTGCCAGGTTTAGTTACTATAGTTTTCCCTATGCTATGGACTACTGGGGTCAAGGAACC…	IGHV2-9-1*01	IGHD2-12*01	IGHJ4*01	8	100	83.3	94.1	100	99.1	100	ATGATGAGTCCTGCCCAGTTCCTGTTTCTGCTAGTGCTCTCGATTCAGGAAACCATTGGTGATGTTGTGATGACCCAGACTCCACTGTCTTTGTCGGTTACCATTGGACAACCAGCCTCCATCTCTTGCAAGTCAAGTCAGAGCCTCTTACATAGTGATGGAAAGACATATTTGAATTGGTTATTACAGAGGCCAGGCCAGTCTCCAAAGCTCCTAATCTATCTGGTGTCTAAACTGGAATCTGGCATCCCTGACAGGGTCAGTGGCAGTGGATCAGGGACAGATTTCACACTGAAAATCAGCAGAGTGGAGGTTGAGGATTTGGGAGTTTATTACTGCGTGCAACATACACATTTTCCTCACACGTTCGGTGCTGGGACCAAGCTGGAGCTGAAACGG	IGKV1-135*01	IGKJ5*01	16	97.4	97	96.1	100	93.5	82.6
5	N228	1	2	IgA	ATGGCTGTCCTGGCGCTACTCCTCTGCCTGATGACTTTCCCAAGCTGTGCCCTGTCCCAGGTGCAGCTGAAGGAGTCAGGACCTGGCCTGGTGGCGCCCTCACAGAGCCTGTCCATCACATGCACTGTCTCTGGGTTCTCATTAACCAACTATGGTATAAGCTGGGTTCGCCAGCCACCAGGAAAGGGTCTGGAGTGGCTTGGAGTAATATGGACAGGTGGAGGCACAAATTATAATTCAGCTCTCAAATCCAGACTGAGCATTAGCAAAGACAGCTCCAAGAGTCAAGTTTTCTTAAAAATGAACAGTCTGCAAACTGATGACACAGCCAGGTACTACTGTGCCAGGTTTAGTTACTATAGTTATCCCTATGCTATGGACTACTGGGGTCAAGGAACC…	IGHV2-9-1*01	IGHD2-12*01	IGHJ4*01	5	100	91.7	100	95.2	98.2	100	ATGATGAGTCCTGCCCAGTTCCTGTTTCTGCTAGTGCTCTCGATTCAGGAAACCAATGGTGATGTTGTGATGACCCAGACTCCACTGTCTTTGTCGGTTACCATTGGACAACCAGCCTCCATCTCTTGCAAGTCAAGTCAGAGCCTCTTACATAGTGATGGAAAGACATATTTGAATTGGTTATTACAGAGGCCAGGCCAGTCTCCAAAACTCCTAATCTATCTGGTGTCTAAACTGGAATCTGGCATCCCTGACAGGGTCAGTGGCAGTGGATCAGGGACAGATTTCACACTGAAAATCAGCAGAGTGGAGGTTGAGGATTTGGGAGTTTATTACTGCTTGCAACATACACATTTTCCTCACACGTTCGGTGCTGGGACCAAGCTGGAGCTGAGACGG	IGKV1-135*01	IGKJ5*01	16	97.4	97	94.1	100	93.5	87
6	N229	1	2	IgA	ATGGCTGTCCTGGCGCTACTCCTCTGCCTGATGACTTTCCCAAGCTGTGCCCTGTCCCAGGTGCAGCTGAAGGAGTCAGGACCTGGCCTGGTGGCGCCCTCACAGAGCCTGTCCATCACATGCACTGTCTCTGGGTTCTCGTTAACCAACTATGCTATAAGCTGGGTTCGCCAGCCACCAGGAAAGGGTCTGGAGTGGCTTGGAGTAATATGGACTGGTGGAGGCACAAATTATAATTCAGCTCTCAAATCCAGACTGAGCATCAGCAAAGACAGCTCCAAGAGTCAAGTTTTCTTAAAAATGAACAGTCTGCAAACTGATGACACAGCCAGGTACTACTGTGCCAGGTTTAGTTACTATAGTTATCCCTATGCTATGGACTACTGGGGTCAAGGAACC…	IGHV2-9-1*01	IGHD2-12*01	IGHJ4*01	3	100	91.7	100	100	99.1	100	ATGATGAGTCCTGCCCAGTTCCTGTTTCTGCTAGTGCTCTCGATTCAGGAAACCAATGGTGATGTTGTGATGATCCAGACTCCACTGTCTTTGTCGGTTACCATTGGACAACCAGCCTCCATCTCTTGCAAGTCAAGTCAGAGCCTCTTACATAGTGATGGAAAGACATATTTGAATTGGTTATTACAGAGGCCAGGCCAGTCTCCAAAGCTCCTAATCTATCTGGTGTCTAAACTGGAATCTGGCATCCCTGACAGGGTCAGTGGCAGTGGATCAGGGACAGATTTCACACTGAAAATCAGCAGAGTGGAGGTTGAGGATTTGGGAGTTTATTACTGCTTGCAACATACACATTTTCCTCACACGTTCGGTGCTGGGACCAAGCTGGAGCTGAAACGG	IGKV1-135*01	IGKJ5*01	16	96.2	97	96.1	100	93.5	87
7	S208	1	2	IgG2	ATGGCTGTCCTGGCGCTACTCCTCTGCCTGATGACTTTCCCAAGCTGTGCCCTGTCCCAGGTGCAGCTGAAGGAGTCAGGACCTGGCCTGGTGGCGCCCTCACAGAGCCTGTCCATCACATGCACTGTCTCTGGGTTCTCATTAATCAATTATGCTATAACCTGGGTTCGCCAGCCACCAGGAAAGGGTCTGGAGTGGCTTGGAGTAATATGGACTGGTGGAGGCACAAATTATAATTCAGCTCTCAAATCCAGACTGAGCATCAGCAAAGACAGCTCCAAGAGTCAAGTTTTCTTAAAAATGAACAGTCTGCAAACTGATGACACAGCCAGGTACTACTGTGCCAGGTTTAGTTACTATAGTTTTCCCTATGCTATGGACTACTGGGGTCAAGGAACC…	IGHV2-9-1*01	IGHD2-12*01	IGHJ4*01	5	100	87.5	98	100	99.1	100	ATGAGTCCTGCCCAGTTCCTGTTTCTGCTAGTGCTCTCGATTCAGGAAACCATTGGTGATGTTGTGATGACCCAGACTCCACTGTCTTTGTCGGTTACCATTGGACAACCAGCCTCCATCTCTTGCAAGTCAAGTCAGAGCCTCTTACATAGTGATGGAAAGACATATTTGAATTGGTTATTACAGAGGCCAGGCCAGTCTCCAAAGCTCCTAATCTATCTGGTGTCTAAACTGGAATCTGGCATCCCTGACAGGGTCAGTGGCAGTGGATCAGGGACAGATTTCACACTGAAAATCAGCAGAGTGGAGGTTGAGGATTTGGGAGTTTATTACTGCGTGCAACATACACATTTTCCTCACACGTTCGGTGCTGGGACCAAGCTGGAGCTGAAACGG	IGKV1-135*01	IGKJ5*01	16	97.4	97	96.1	100	93.5	87
8	S528	1	2	IgA	ATGGCTGTCCTGGCGCTACTCCTCTGCCTGATGACTTTCCCAAGCTGTGCCCTGTCCCAGGTGCAGCTGAAGGAGTCAGGACCTGGCCTGGTGGCGCCCTCACAGAGCCTGTCCATCACATGCACTGTCTCTGGGTTCTCATTAACCAACTATGCTATAAGTTGGGTTCGCCAGCCACCAGGAAAGGGTCTGGAGTGGCTTGGAGTAATATGGACTGGTGGAGGCACAAATTATAATTCAGCTCTCAAATCCAGACTGAGCATCAGCAAAGACAGCTCCAAGAGTCAAGTTTTCTTAAAAATGAACAGTCTGCAAACTGATGACACAGCCAGGTACTACTGTGCCAGGTTTAGTTACTATAGTTATCCCTATGCTATGGACTACTGGGGTCAAGGAACC…	IGHV2-9-1*01	IGHD2-12*01	IGHJ4*01	3	100	95.8	98	100	99.1	100	ATGAGTCCTGCCCAGTTCCTGTTTCTGCTAGTGCTCTCGATTCAGGAAACCAATGGTGATGTTGTGATGACCCAGACTCCACTGTCTTTGTCGGTTACCATTGGACAACCAGCCTCCATCTCTTGCAAGTCAAGTCAGAGCCTCTTACATAGTGATGGAAAGACATATTTGAATTGGTTATTACAGAGGCCAGGCCAGTCTCCAAAGCTCCTAATCTATCTGGTGTCTAAACTGGAATCTGGCATCCCTGACAGGGTCAGTGGCAGTGGATCAGGGACAGATTTCACACTGAAAATCAGCAGAGTGGAGGTTGAGGATTTGGGAGTTTATTACTGCTTGCAACATACACATTTTCCTCACACGTTCGGTGCTGGGACCAAGCTGGAGCTGAAACGG	IGKV1-135*01	IGKJ5*01	15	97.4	97	96.1	100	93.5	82.6
9	S530	1	2	IgA	ATGGCTGTCCTGGCGCTACTCCTCTGCCTGATGACTTTCCCAAGCTGTGCCCTGTCCCAGGTGCAGCTGAAGGAGTCAGGACCTGGCCTGGTGGCGCCCTCACAGAGCCTGTCCATCACATGCACTGTCTCTGGGTTCTCATTAATCAATTATGCTATAACCTGGGTTCGCCAGCCACCAGGAAAGGGTCTGGAGTGGCTTGGAGTAATATGGACTGGTGGAGGCACAAATTATAATTCAGCTCTCAAATCCAGACTGAGCATCAGCAAAGACAGCTCCAAGAGTCAAGTTTTCTTAAAAATGAACAGTCTGCAAACTGATGACACAGCCAGGTACTACTGTGCCAGGTTTAGTTACTATAGTTTTCCCTATGCTATGGACTACTGGGGTCAAGGAACC…	IGHV2-9-1*01	IGHD2-12*01	IGHJ4*01	5	100	87.5	98	100	99.1	100	ATGAGTCCTGCCCAGTTCCTGTTTCTGCTAGTGCTCTCGATTCAGGAAACCATTGGTGATGTTGTGATGACCCAGACTCCACTGTCTTTGTCGGTTACCATTGGACAACCAGCCTCCATCTCTTGCAAGTCAAGTCAGAGCCTCTTACATAGTGATGGAAAGACATATTTGAATTGGTTATTACAGAGGCCAGGCCAGTCTCCAAAGCTCCTAATCTATCTGGTGTCTAAACTGGAATCTGGCATCCCTGACAGGGTCAGTGGCAGTGGATCAGGGACAGATTTCACACTGAAAATCAGCAGAGTGGAGGTTGAGGATTTGGGAGTTTATTACTGCGTGCAACATACACATTTTCCTCACACGTTCGGTGCTGGGACCAAGCTGGAGCTGAAACGG	IGKV1-135*01	IGKJ5*01	16	97.4	97	96.1	100	93.5	82.6
10	S604	1	2	IgA	ATGGCTGTCCTGGCGCTACTCCTCTGCCTGATGACTTTCCCAAGCTGTGCCCTGTCCCAGGTACAGCTGAAGGAGTCAGGACCTGGCCTGGTGGCGCCCTCACAGAGCCTGTCCATCACATGCACTGTCTCTGGGTTCTCATTAACCAACTTTGCTATAAGCTGGGTTCGCCAGCCACCAGGAAAGGGTCTGGAATGGCTTGGAGTAATATGGACTGGTGGAGGCACAAATTATAATTCAGCTCTCAAATCCAGACTGAGCATCAGCAAAGACAGCTCCAAGAGTCAAGTTTTCTTAAAAATGAACAGTCTGCAAACTGATGACACAGCCAGGTACTACTGTGCCAGGTTTAGTTACTATAGTTATCCCTATGCTATGGACTACTGGGGTCAAGGAACC…	IGHV2-9-1*01	IGHD2-12*01	IGHJ4*01	5	98.7	91.7	98	100	99.1	100	ATGAGTCCTGCCCAGTTCCTGTTTCTGCTAGTGCTCTCGATTCAGGAAACCAATGGTGATGTTGTGATGACCCAGACTCCACTGTCTTTGTCGGTTACCATTGGACAACCAGCCTCCATCTCTTGCAAGTCAAGTCAGAGCCTCTTACATAGTGATGGAAAGACATATTTGAATTGGTTATTACAGAGGCCAGGCCAGTCTCCAAAGCTCCTAATCTATCTGGTGTCTAAACTGGAATCTGGCATCCCTGACAGGGTCAGTGGCAGTGGATCAGGGACAGATTTCACACTGAAAATCAGCAGAGTGGAGGTTGAGGATTTGGGAGTTTATTACTGCTTGCAACAGACACATTTTCCTCACACGTTCGGTGCTGGGACCAAACTGGAGCTGAAACGG	IGKV1-135*01	IGKJ5*01	16	97.4	97	96.1	100	93.5	82.6
11	S619	1	2	IgA	ATGGCTGTCCTGGCGCTACTCCTCTGCCTGATGACTTTCCCAAGCTGTGCCCTGTCCCAGGTGCAGCTGAAGGAGTCAGGACCTGGCCTGGTGGCGCCCTCACAGAGCCTGTCCATCACATGCACTGTCTCTGGGTTCTCATTAATCAATTATGCTATAACCTGGGTTCGCCAGCCACCAGGAAAGGGTCTGGAGTGGCTTGGAGTAATATGGACTGGTGGAGGCACAAATTATAATTCAGCTCTCAAATCCAGACTGAGCATCAGCAAAGACAGCTCCAAGAGTCAAGTTTTCTTAAAAATGAACAGTCTGCAAACTGATGACACAGCCAGGTACTACTGTGCCAGGTTTAGTTACTATAGTTTTCCCTATGCTATGGACTACTGGGGTCAAGGAACC…	IGHV2-9-1*01	IGHD2-12*01	IGHJ4*01	5	100	87.5	98	100	99.1	100	ATGAGTCCTGCCCAGTTCCTGTTTCTGCTAGTGCTCTCGATTCAGGAAACCATTGGTGATGTTGTGATGACCCAGACTCCACTGTCTTTGTCGGTTACCATTGGACAACCAGCCTCCATCTCTTGCAAGTCAAGTCAGAGCCTCTTACATAGTGATGGAAAGACATATTTGAATTGGTTATTACAGAGGCCAGGCCAGTCTCCAAAGCTCCTAATCTATCTGGTGTCTAAACTGGAATCTGGCATCCCTGACAGGGTCAGTGGCAGTGGATCAGGGACAGATTTCACACTGAAAATCAGCAGAGTGGAGGTTGAGGATTTGGGAGTTTATTACTGCGTGCAACATACACATTTTCCTCACACGTTCGGTGCTGGGACCAAGCTGGAGCTGAAACGG	IGKV1-135*01	IGKJ5*01	16	97.4	97	96.1	100	93.5	87
12	S632	1	2	IgA	ATGGCTGTCCTGGCGCTACTCCTCTGCCTGATGACTTTCCCAAGCTGTGCCCTGTCCCAGGTGCAGCTGAAGGAGTCAGGACCTGGCCTGGTGGCGCCCTCACAGAGCCTGTCCATCACATGCACTGTCTCTGGGTTCTCATTAACCAATTATGCTATAAGCTGGGTTCGCCAGCCACCAGGAAAGGGTCTGGAGTGGCTTGGAGTAATATGGACTGGTGGAGGCACAAATTATAATTCAGCTCTCAAATCCAGACTGAGCATCAGCAAAGACAGCTCCAAGAGTCAAGTTTTCTTAAAAATGAACAGTCTGCAAACTGATGACACAGCCAGGTACTACTGTGCCAGGTTTAGTTACTATAGTTATCCCTATGCTATGGACTACTGGGGTCAAGGAACC…	IGHV2-9-1*01	IGHD2-12*01	IGHJ4*01	3	100	91.7	100	100	99.1	100	ATGAGTCCTGCCCAGTTCCTGTTTCTGCTAGTGCTCTCGATTCAGGAAACCAATGGTGATGTTGTGATGACCCAGACTCCACTGTCTTTGTCGGTTACCATTGGACAACCAGCCTCCATCTCTTGCAAGTCAAGTCAGAGCCTCTTACATAGTGATGGAAAGACATATTTGAATTGGTTATTACAGAGGCCAGGCCAGTCTCCAAAGCTCCTAATCTATCTGGTGTCTAAACTGGAATCTGGCATCCCTGACAGGGTCAGTGGCAGTGGATCAGGGACAGATTTCACACTGAAAATCAGCAGAGTGGAGGTTGAGGATTTGGGAGTTTATTACTGCTTGCAACATACACATTTTCCTCACACGTTCGGTGCTGGGACCAAGCTGGAGCTGAAACGG	IGKV1-135*01	IGKJ5*01	15	98.7	97	98	100	98.1	95
13	N109	2	3	IgA	ATGGCTGTCCTGGCGCTACTCCTCTGCCTGATGACTTTCCCAAGCTGTGCCCTGTCCCAGGTGCAGCTGAAGGAGTCAGGACCTGGCCTGGTGGCGCCCTCACAGAGCCTGTCCATCACATGCACTGTCTCTGGGTTCTCATTAATCAACTATGCTATAAGCTGGGTTCGCCAGCCACCAGGAAAGGGTCTGGAGTGGCTTGGAGTAATATGGACTGGTGGAGGCACAAATTATAATTCAGCTCTCAAATCCAGACTGAGCATCAGCAAAGACAACTCCAAGAGTCAAGTTTTCTTAAAAATGAACAGTCTGCAAACTGATGACACAGCCAGGTACTACTGTGCCAGGTATAGTTACTATAGTTACGACGTCGGTTTTGGCTACTGGGGCCAAGGCACC…	IGHV2-9-1*01	IGHD2-12*01	IGHJ2*01	2	100	91.7	100	100	100	100	ATGAAGTTGCCTGTTAGGCTGTTGGTGCTGATGTTCTGGATTCCTGCTTCCAGCAGTGATGTTGTGATGACCCAAACTCCACTCTCCCTGCCTGTCAGTCTTGGAGATCAAGCCTCCATCTCTTGCAGATCTAGTCAGAGCATTGTACATAGTGATGGAAACACCTATTTAGAATGGTACCTGCAGAAGCCAGGCCAGTCTCCAAAGCTCCTGATCTACAAAGTTTCCAACCGATTTTCTGGGGTCCCAGACAGGTTCAGTGGCAGTGGATCAGGGACAGATTTCTCACTCAAGATCAGCAGAGTGGAGACTGAGGATCTGGGAGTTTATTACTGCTTTCAAGCTTCACATGTTCCGTGGACGTTCGGTGGAGGCACCAAGCTGGAAATCAAACGGG	IGKV1-117*01	IGKJ1*01	6	98.7	97	98	100	98.1	95
14	N112	2	3	IgA	ATGGCTGTCCTGGCGCTACTCCTCTGCCTGATGACTTTCCCAAGCTGTGCCCTGTCCCAGGTGCAGCTGAAGGAGTCAGGACCTGGCCTGGTGGCGCCCTCACAGAGCCTGTCCATCACATGCACTGTCTCTGGGTTCTCATTAATCAACTATGCTATAAGCTGGGTTCGCCAGCCACCAGGAAAGGGTCTGGAGTGGCTTGGAGTAATATGGACTGGTGGAGGCACAAATTATAATTCAGCTCTCAAATCCAGACTGAGCATCAGCAAAGACAACTCCAAGAGTCAAGTTTTCTTAAAAATGAACAGTCTGCAAACTGATGACACAGCCAGGTACTACTGTGCCAGGTATAGTTACTATAGTTACGACGTCGGTTTTGGCTACTGGGGCCAAGGCACC…	IGHV2-9-1*01	IGHD2-12*01	IGHJ2*01	2	100	91.7	100	100	100	100	ATGAAGTTGCCTGTTAGGCTGTTGGTGCTGATGTTCTGGATTCCTGCTTCCAGCAGTGATGTTGTGATGACCCAAACTCCACTCTCCCTGCCTGTCAGTCTTGGAGATCAAGCCTCCATCTCTTGCAGATCTAGTCAGAGCATTGTACATAGTGATGGAAACACCTATTTAGAATGGTACCTGCAGAAGCCAGGCCAGTCTCCAAAGCTCCTGATCTACAAAGTTTCCAACCGATTTTCTGGGGTCCCAGACAGGTTCAGTGGCAGTGGATCAGGGACAGATTTCTCACTCAAGATCAGCAGAGTGGAGACTGAGGATCTGGGAGTTTATTACTGCTTTCAAGCTTCACATGTTCCGTGGACGTTCGGTGGAGGCACCAAGCTGGAAATCAAACGGG	IGKV1-117*01	IGKJ1*01	6	98.7	97	98	100	98.1	95
15	N117	2	3	IgA	ATGGCTGTCCTGGCGCTACTCCTCTGCCTGATGACTTTCCCAAGCTGTGCCCTGTCCCAGGTGCAGCTGAAGGAGTCAGGACCTGGCCTGGTGGCGCCCTCACAGAGCCTGTCCATCACATGCACTGTCTCTGGGTTCTCATTAATCAACTATGCTATAAGCTGGGTTCGCCAGCCACCAGGAAAGGGTCTGGAGTGGCTTGGAGTAATATGGACTGGTGGAGGCACAAATTATAATTCAGCTCTCAAATCCAGACTGAGCATCAGCAAAGACAACTCCAAGAGTCAAGTTTTCTTAAAAATGAACAGTCTGCAAATTGATGACACAGCCAGGTACTACTGTGCCAGGTATAGTTACTATAGTTACGACGTCGGTTTTGGCTACTGGGGCCAAGGCACC…	IGHV2-9-1*01	IGHD2-12*01	IGHJ2*01	3	100	91.7	100	100	99.1	100	ATGAAGTTGCCTGTTAGGCTGTTGGTGCTGATGTTCTGGATTCCTGCTTCCAGCAGTGATGTTGTGATGACCCAAACTCCACTCTCCCTGCCTGTCAGTCTTGGAGATCAAGCCTCCATCTCTTGCAGATCTAGTCAGAGCATTGTACATAGTGATGGAAACACCTATTTAGAATGGTACCTGCAGAAGCCAGGCCAGTCTCCAAAGCTCCTGATCTACAAAGTTTCCAACCGATTTTCTGGGGTCCCAGACAGGTTCAGTGGCAGTGGATCAGGGACAGATTTCTCACTCAAGATCAGCAGAGTGGAGACTGAGGATCTGGGAGTTTATTACTGCTTTCAAGCTTCACATGTTCCGTGGACGTTCGGTGGAGGCACCAAGCTGGAAATCAAACGG	IGKV1-117*01	IGKJ1*01	6	98.7	97	98	100	98.1	95
16	N120	2	3	IgA	ATGGCTGTCCTGGCGCTACTCCTCTGCCTGATGACTCTCCCAAGCTGTGCCCTGTCCCAGGTGCAGCTGAAGGAGTCAGGACCTGGCCTGGTGGCGCCCTCACAGAGCCTGTCCATCACATGCACTGTCTCTGGGTTCTCATTAATCAACTATGCTATAAGCTGGGTTCGCCAGCCACCAGGAAAGGGTCTGGAGTGGCTTGGAGTAATATGGACTGGTGGAGGCACAAATTATAATTCAGCTCTCAAATCCAGACTGAGCATCAGCAAAGACAATTCCAAGAGTCAAGTTTTCTTAAAAATGAACAGTCTGCAAACTGATGACACAGCCAGGTACTACTGTGCCAGGTATAATTACTATAGTTACGACGTCGGTTTTGGCTACTGGGGCCAAGGCACC…	IGHV2-9-1*01	IGHD2-12*01	IGHJ2*01	3	100	91.7	100	100	99.1	100	ATGAAGTTGCCTGTTAGGCTGTTGGTGCTGATGTTCTGGATTCCTGCTTCCAGCAGTGATGTTGTGATGACCCAAACTCCACTCTCCCTGCCTGTCAGTCTTGGAGATCAAGCCTCCATCTCTTGCAGATCTAGTCAGAGCATTGTACATAGTGATGGAAACACCTATTTAGAATGGTACCTGCAGAAGCCAGGCCAGTCTCCAAAGCTCCTGATCTACAAAGTTTCCAACCGATTTTCTGGGGTCCCAGACAGGTTCAGTGGCAGTGGATCAGGGACAGATTTCTCACTCAAGATCAGCAGAGTGGAGACTGAGGATCTGGGAGTTTATTACTGCTTTCAAGCTTCACATGTTCCGTGGACGTTCGGTGGAGGCACCAAGCTGGAAATCAAACGG	IGKV1-117*01	IGKJ1*01	6	98.7	97	98	100	98.1	100
17	N135	2	3	IgA	ATGGCTGTCCTGGCGCTACTCCTCTGCCTGATGACTTTCCCAAGCTGTGCCCTGTCCCAGGTGCAGCTGAAGGAGTCAGGACCTGGCCTGGTGGCGCCCTCACAGAGCCTGTCCATCACATGCACTGTCTCTGGGTTCTCATTAATCAACTATGCTATAAGCTGGGTTCGCCAGCCACCAGGAAAGGGTCTGGAGTGGCTTGGAGTAATATGGACTGGTGGAGGCACAAATTATAATTCAGCTCTCAAATCCAGACTGAGCATCAGCAAAGACAACTCCAAGAGTCAAGTTTTCTTAAAAATGAACAGTCTGCAAACTGATGACACAGCCAGGTACTACTGTGCCAGGTATAGTTACTATAGTTACGACGTCGGTTTTGGCTACTGGGGCCAAGGCACC…	IGHV2-9-1*01	IGHD2-12*01	IGHJ2*01	2	100	91.7	100	100	100	100	ATGAAGTTGCCTGTTAGGCTGTTGGTGCTGATGTTCTGGATTCCTGCTTCCAGCAGTGATGTTGTGATGACCCAAACTCCACTCTCCCTGCCTGTCAGTCTTGGAGATCAAGCCTCCATCTCTTGCAGATCTAGTCAGAGCATTGTACATAGTGATGGAAACACCTATTTAGAATGGTACCTGCAGAAGCCAGGCCAGTCTCCAAAGCTCCTGATCTACAAAGTTTCCAACCGATTTTCTGGGGTCCCAGACAGGTTCAGTGGCAGTGGATCAGGGACAGATTTCTCACTCAAGATCAGCAGAGTGGAGACTGAGGATCTGGGAGTTTATTACTGCTTTCAAGGTTCACATGTTCCGTGGACGTTCGGTGGAGGCACCAAGCTGGAAATCAAACGG	IGKV1-117*01	IGKJ1*01	5	98.7	97	98	100	98.1	95
18	N137	2	3	IgA	ATGGCTGTCCTGGCGCTACTCCTCTGCCTGATGACTTTCCCAAGCTGTGCCCTGTCCCAGGTGCAGCTGAAGGAGTCAGGACCTGGCCTGGTGGCGCCCTCACAGAGCCTGTCCATCACATGCACTGTCTCTGGGTTCTCATTAATGAACTATGCTATAAGCTGGGTTCGCCAGCCACCAGGAAAGGGTCTGGAGTGGCTTGGAGTAATATGGACTGGTGGAGGCACAAATTATAATTTAGCTCTCAAATCCAGACTGAGCATCAGCAAAGACAACTCCAAGAGTCAAGTTTTCTTAAAAATGAACAGTCTGCAAACTGATGACACAGCCAGGTACTACTGTGCCAGGTATAATTACTACAGTTACGACGTCGGTTTTGGCTACTGGGGCCAAGGCACC…	IGHV2-9-1*01	IGHD2-12*01	IGHJ2*01	4	100	87.5	100	100	99.1	100	ATGAAGTTGCCTGTTAGGCTGTTGGTGCTGATGTTCTGGATTCCTGCTTCCAGCAGTGATGTTGTGATGACCCAAACTCCACTCTCCCTGCCTGTCAGTCTTGGAGATCAAGCCTCCATCTCTTGCAGATCTAGTCAGAGCATTGTACATAGTGATGGAAACACCTATTTAGAATGGTACCTGCAGAAGCCAGGCCAGTCTCCAAAGCTCCTGATCTACAAAGTTTCCAACCGATTTTCTGGGGTCCCAGACAGGTTCAGTGGCAGTGGATCAGGGACAGATTTCTCACTCAAGATCAGCAGAGTGGAGACTGAGGATCTGGGAGTTTATTACTGCTTTCAAGCTTCACATGTTCCGTGGACGTTCGGTGGAGGCACCAAGCTGGAAATCAAACGG	IGKV1-117*01	IGKJ1*01	6	98.7	97	98	100	98.1	95
19	N139	2	3	IgA	ATGGCTGTCCTGGCGCTACTCCTCTGCCTGATGACTTTCCCAAGCTGTGCCCTGTCCCAGGTGCAGCTGAAGGAGTCAGGACCTGGCCTGGTGGCGCCCTCACAGAGCCTGTCCATCACATGCACTGTCTCTGGGTTCTCATTAATCAACTATGCTATAAGCTGGGTTCGCCAGCCACCAGGAAAGGGTCTGGAGTGGCTTGGAGTAATATGGACTGGTGGAGGCACAAATTATAATTCAGCTCTCAAATCCAGACTGAGCATCAGCAAAGACAACTCCAAGAGTCAAGTTTTCTTAAAAATGAACAGTCTGCAAACTGATGACACAGCCAGGTACTACTGTGCCAGGTATAGTTACTATAGTTACGACGTCGGTTTTGGCTACTGGGGCCAAGGCACC…	IGHV2-9-1*01	IGHD2-12*01	IGHJ2*01	2	100	91.7	100	100	100	100	ATGAAGTTGCCTGTTAGGCTGTTGGTGCTGATGTTCTGGATTCCTGCTTCCAGCAGTGATGTTGTGATGACCCAAACTCCACTCTCCCTGCCTGTCAGTCTTGGAGATCAAGCCTCCATCTCTTGCAGATCTAGTCAGAGCATTGTACATAGTGATGGAAACACCTATTTAGAATGGTACCTGCAGAAGCCAGGCCAGTCTCCAAAGCTCCTGATCTACAAAGTTTCCAACCGATTTTCTGGGGTCCCAGACAGGTTCAGTGGCAGTGGATCAGGGACAGATTTCTCACTCAAGATCAGCAGAGTGGAGACTGAGGATCTGGGAGTTTATTACTGCTTTCAAGCTTCACATGTTCCGTGGACGTTCGGTGGAGGCACCAAGCTGGAAATCAAACGG	IGKV1-117*01	IGKJ1*01	6	98.7	97	98	100	98.1	95
20	N222	2	3	IgA	ATGGCTGTCCTGGCGCTACTCCTCTGCCTGATGACTTTCCCAAGCTGTGCCCTGTCCCAGGTACAGCTGAAGGAGTCAGGACCTGGCCTGGTGGCGCCCTCACAGAGCCTGTCCATCACATGCACTGTCTCTGGGTTCTCATTAATCAACTATGCTATAACCTGGGTTCGCCAGCCACCAGGAAAGGGTCTGGAGTGGCTTGGAGTAATATGGACTGGTGGAGGCACACATTATAATTCAGCTCTCAAATCCAGACTGAGCATCAGCAAAGACAACTCCAAGAGTCAAGTTTTCTTAAAAATGAACAGTCTGCAAACTGATGACACAGCCAGGTACTACTGTGCCAGGTATAGTTACTATAGTTACGACGTCGGTTTTGGCTACTGGGGCCAAGGCACC…	IGHV2-9-1*01	IGHD2-12*01	IGHJ2*01	5	98.7	91.7	98	100	99.1	100	ATGAAGTTGCCTGTTAGGCTGTTGGTGCTGATGTTCTGGATTCCTGCTTCCAGCAGTGATGTTGTGATGACCCAAACTCCACTCTCCCTGCCTGTCAGTCTTGGAGATCAAGCCTCCATCTCTTGCAGATCTAGTCAGAGCATTGTACATAGTGATGGAAACACCTATTTAGAATGGTACCTGCAGAAGCCAGGCCAGTCTCCAAAGCTCCTGATCTACAAAGTTTCCAACCGATTTTCTGGGGTCCCAGACAGGTTCAGTGGCAGTGGATCAGGGACAGATTTCTCACTCAAGATCAGCAGAGTGGAGACTGAGGATCTGGGAGTTTATTACTGCTTTCAAGCTTCACATGTTCCGTGGACGTTCGGTGGAGGCACCAAGCTGGAAATCAAACGG	IGKV1-117*01	IGKJ1*01	6	98.7	97	98	100	98.1	95
21	N244	2	3	IgA	ATGGCTGTCCTGGCGCTACTCCTCTGCCTGATGACTTTCCCAAGCTGTGCCCTGTCCCAGGTGCAGCTGAAGGAGTCAGGACCTGGCCTGGTGGCGCCCTCACAGAGCCTGTCCATCACATGCACTGTCTCTGGGTTCTCATTAATCAACTATGCTATAAGCTGGGTTCGCCAGCCACCAGGAAAGGGTCTGGAGTGGCTTGGAGTAATATGGACTGGTGGAGGCACAAATTATAATTCAGCTCTCAAATCCAGACTGAGCATCAGCAAAGACAACTCCAAGAGTCAAGTTTTCTTAAAAATGAACAGTCTGCAAACTGATGACACAGCCAGGTACTACTGTGCCAGGTATAGTTACTATAGTTACGACGTCGGTTTTGGCTACTGGGGCCAAGGCACC…	IGHV2-9-1*01	IGHD2-12*01	IGHJ2*01	2	100	91.7	100	100	100	100	ATGAAGTTGCCTGTTAGGCTGTTGGTGCTGATGTTCTGGATTCCTGCTTCCAGCAGTGATGTTGTGATGACCCAAACTCCACTCTCCCTGCCTGTCAGTCTTGGAGATCAAGCCTCCATCTCTTGCAGATCTAGTCAGAGCATTGTACATAGTGATGGAAACACCTATTTAGAATGGTACCTGCAGAAGCCAGGCCAGTCTCCAAAGCTCCTGATCTACAAAGTTTCCAACCGATTTTCTGGGGTCCCAGACAGGTTCAGTGGCAGTGGATCAGGGACAGATTTCTCACTCAAGATCAGCAGAGTGGAGACTGAGGATCTGGGAGTTTATTACTGCTTTCAAGCTTCACATGTTCCGTGGACGTTCGGTGGAGGCACCAAGCTGGAAATCAAACGG	IGKV1-117*01	IGKJ1*01	6	98.7	97	98	100	98.1	100
22	N245	2	3	IgA	ATGGCTGTCCTGGCGCTACTCCTCTGCCTGATGACTTTCCCAAGCTGTGCCCTGTCCCAGGTGCAGCTGAAGGAGTCAGGACCTGGCCTGGTGGCGCCCTCACAGAGCCTGTCCATCACATGCACTGTCTCTGGGTTCTCATTAATCAACTATGCTATAAGCTGGGTTCGCCAGCCACCAGGAAAGGGTCTGGAGTGGCTTGGAGTAATATGGACTGGTGGAGGCACAAATTATAATTCAGCTCTCAAATCCAGACTGAGCATCAGCAAAGACAACTCCAAGAGTCAAGTTTTCTTAAAAATGAACAGTCTGCAAACTGATGACACAGCCAGGTACTACTGTGCCAGGTATAGTTACTATAGTTACGACGTCGGTTTTGGCTACTGGGGCCAAGGCACC…	IGHV2-9-1*01	IGHD2-12*01	IGHJ2*01	2	100	91.7	100	100	100	100	ATGAAGTTGCCTGTTAGGCTGTTGGTGCTGATGTTCTGGATTCCTGCTTCCAGCAGTGATGTTGTGATGACCCAAACTCCACTCTCCCTGCCTGTCAGTCTTGGAGATCAAGCCTCCATCTCTTGCAGATCTAGTCAGAGCATTGTACATAGTGATGGAAACACCTATTTAGAATGGTACCTGCAGAAGCCAGGCCAGTCTCCAAAGCTCCTGATCTACAAAGTTTCCAACCGATTTTCTGGGGTCCCAGACAGGTTCAGTGGCAGTGGATCAGGGACAGATTTCTCACTCAAGATCAGCAGAGTGGAGACTGAGGATCTGGGAGTTTATTACTGCTTTCAAGGTTCACATGTTCCGTGGACGTTCGGTGGAGGCACCAAGCTGGAAATCAAACGG	IGKV1-117*01	IGKJ1*01	5	98.7	97	98	100	98.1	95
23	N715	2	3	IgA	ATGGCTGTCCTGGCGCTACTCCTCTGCCTGATGACTTTCCCAAGCTGTGCCCTGTCCCAGGTGCAGCTGAAGGAGTCAGGACCTGGCCTGGTGGCGCCCTCACAGAGCCTGTCCATCACATGCACTGTCTCTGGGTTCTCATTAATCAACTATGCTATAAGCTGGGTTCGCCAGCCACCAGGAAAGGGTCTGGAGTGGCTTGGAGTAATATGGACTGGTGGAGGCACAAATTATAATTCAGCTCTCAAATCCAGACTGAGCATCAGCAAAGACAACTCCAAGAGTCAAGTTTTCTTAAAAATGAACAGTCTGCAAACTGATGACACAGCCAGGTACTACTGTGCCAGGTATAGTTACTATAGTTACGACGTCGGTTTTGGCTACTGGGGCCAAGGCACC…	IGHV2-9-1*01	IGHD2-12*01	IGHJ2*01	2	100	91.7	100	100	100	100	ATGAAGTTGCCTGTTAGGCTGTTGGTGCTGATGTTCTGGATTCCTGCTTCCAGCAGTGATGTTGTGATGACCCAAACTCCACTCTCCCTGCCTGTCAGTCTTGGAGATCAAGCCTCCATCTCTTGCAGATCTAGTCAGAGCATTGTACATAGTGATGGAAACACCTATTTAGAATGGTACCTGCAGAAGCCAGGCCAGTCTCCAAAGCTCCTGATCTACAAAGTTTCCAACCGATTTTCTGGGGTCCCAGACAGGTTCAGTGGCAGTGGATCAGGGACAGATTTCTCACTCAAGATCAGCAGAGTGGAGACTGAGGATCTGGGAGTTTATTACTGCTTTCAAGCTTCACATGTTCCGTGGACGTTCGGTGGAGGCACCAAGCTGGAAATCAAACGG	IGKV1-117*01	IGKJ1*01	6	98.7	97	98	100	98.1	95
24	N717	2	3	IgA	ATGGCTGTCCTGGCGCTACTCCTCTGCCTGATGACTTTCCCAAGCTGTGCCCTGTCCCAGGTGCAGCTGAAGGAGTCAGGACCTGGCCTGGTGGCGCCCTCACAGAGCCTGTCCATCACATGCACTGTCTCTGGGTTCTCATTAATCAACTATGCTATAAGCTGGGTTCGCCAGCCACCAGGAAAGGGTCTGGAGTGGCTTGGAGTAATATGGACTGGTGGAGGCACAAATTATAATTCAGCTCTCAAATCCAGACTGAGCATCAGCAAAGACAACTCCAAGAGTCAAGTTTTCTTAAAAATGAACAGTCTGCAAACTGATGACACAGCCAGGTACTACTGTGCCAGGTATAGTTACTATAGTTACGACGTCGGTTTTGGCTACTGGGGCCAAGGCACC…	IGHV2-9-1*02	IGHD2-12*02	IGHJ2*02	2	100	91.7	100	100	100	100	ATGAAGTTGCCTGTTAGGCTGTTGGTGCTGATGTTCTGGATTCCTGCTTCCAGCAGTGATGTTGTGATGACCCAAACTCCACTCTCCCTGCCTGTCAGTCTTGGAGATCAAGCCTCCATCTCTTGCAGATCTAGTCAGAGCATTGTACATAGTGATGGAAACACCTATTTAGAATGGTACCTGCAGAAGCCAGGCCAGTCTCCAAAGCTCCTGATCTACAAAGTTTCCAACCGATTTTCTGGGGTCCCAGACAGGTTCAGTGGCAGTGGATCAGGGACAGATTTCTCACTCAAGATCAGCAGAGTGGAGACTGAGGATCTGGGAGTTTATTACTGCTTTCAAGCTTCACATGTTCCGTGGACGTTCGGTGGAGGCACCAAGCTGGAAATCAAACGG	IGKV1-117*01	IGKJ1*01	6	98.7	97	98	100	98.1	95
25	S532	2	3	IgA	ATGGCTGTCCTGGCGCTACTCCTCTGCCTGATGACTTTCCCAAGCTGTGCCCTGTCCCAGGTACAGCTGAAGGAGTCAGGACCTGGCCTGGTGGCGCCCTCACAGAGCCTGTCCATCACATGCACTGTCTCTGGGTTCTCATTAATCAACTATGCTATAAGCTGGGTTCGCCAGCCACCAGGAAAGGGTCTGGAGTGGCTTGGAGTAATATGGACTGGTGGAGGCACAAATTATAATTCAGCTCTCAAATCCAGACTGAGCATCAGCAAAGACAACTCCAAGAGTCAAGTTTTCTTAAAAATGAACAGTCTGCAAACTGATGACACAGCCAGGTACTACTGTGCCAGGTATAGTTACTATAGTTACGACGTCGGTTTTGGCTACTGGGGCCAAGGCACC…	IGHV2-9-1*01	IGHD2-12*01	IGHJ2*01	3	98.7	91.7	100	100	100	100	ATGAAGTTGCCTGTTAGGCTGTTGGTGCTGATGTTCTGGATTCCTGCTTCCAGCAGTGATGTTGTGATGACCCAAACTCCACTCTCCCTGCCTGTCAGTCTTGGAGATCAAGCCTCCATCTCTTGCAGATCTAGTCAGAGCATTGTACATAGTGATGGAAACACCTATTTAGAATGGTACCTGCAGAAGCCAGGCCAGTCTCCAAAGCTCCTGATCTACAAAGTTTCCAACCGATTTTCTGGGGTCCCAGACAGGTTCAGTGGCAGTGGATCAGGGACAGATTTCTCACTCAAGATCAGCAGAGTGGAGACTGAGGATCTGGGAGTTTATTACTGCTTTCAAGCTTCACATGTTCCGTGGACGTTCGGTGGAGGCACCAAGCTGGAAATCAAACGG	IGKV1-117*01	IGKJ1*01	6	98.7	97	98	100	98.1	95
26	S545	2	3	IgA	ATGGCTGTCCTGGCGCTACTCCTCTGCCTGATGACTTTCCCAAGCTGTGCCCTGTCCCAGGTGCAGCTGAAGGAGTCAGGACCTGGCCTGGTGGCGCCCTCACAGAGCCTGTCCATCACATGCACTGTCTCTGGGTTCTCATTAATCAACTATGCTATAAGCTGGGTTCGCCAGCCACCAGGAAAGGGTCTGGAGTGGCTTGGAGTAATATGGACTGGTGGAGGCACAAATTATAATTCAGCTCTCAAATCCAGACTGAGCATCAGCAAAGACAACTCCAAGAGTCAAGTTTTCTTAAAAATGAACAGTCTGCAAACTGATGACACAGCCAGGTACTACTGTGCCAGGTATAGTTACTATAGTTACGACGTCGGTTTTGGCTACTGGGGCCAAGGCACC…	IGHV2-9-1*01	IGHD2-12*01	IGHJ2*01	2	100	91.7	100	100	100	100	ATGAAGTTGCCTGTTAGGCTGTTGGTGCTGATGTTCTGGATTCCTGCTTCCAGCAGTGATGTTGTGATGACCCAAACTCCACTCTCCCTGCCTGTCAGTCTTGGAGATCAAGCCTCCATCTCTTGCAGATCTAGTCAGAGCATTGTACATAGTGATGGAAACACCTATTTAGAATGGTACCTGCAGAAGCCAGGCCAGTCTCCAAAGCTCCTGATCTACAAAGTTTCCAACCGATTTTCTGGGGTCCCAGACAGGTTCAGTGGCAGTGGATCAGGGACAGATTTCTCACTCAAGATCAGCAGAGTGGAGACTGAGGATCTGGGAGTTTATTACTGCTTTCAAGCTTCACATGTTCCGTGGACGTTCGGTGGAGGCACCAAGCTGGAAATCAAACGG	IGKV1-117*01	IGKJ1*01	6	98.7	97	98	100	98.1	95
27	S607	2	3	IgA	ATGGCTGTCCTGGCGCTACTCCTCTGCCTGATGACTTTCCCAAGCTGTGCCCTGTCCCAGGTGCAGCTGAAGGAGTCAGGACCTGGCCTGGTGGCGCCCTCACAGAGCCTGTCCATCACATGCACTGTCTCTGGGTTCTCATTAATCAACTATGCTATAAGCTGGGTTCGCCAGCCACCAGGAAAGGGTCTGGAGTGGCTTGGAGTAATATGGACTGGTGGAGGCACAAATTATAATTCAGCTCTCAAATCCAGACTGAGCATCAGCAAAGACAACTCCAAGAGTCAAGTTTTCTTAAAAATGAACAGTCTGCAAACTGATGACACAGCCAGGTACTACTGTGCCAGGTATAGTTACTATAGTTACGACGTCGGTTTTGGCTACTGGGGCCAAGGCACC…	IGHV2-9-1*01	IGHD2-12*01	IGHJ2*01	2	100	91.7	100	100	100	100	ATGAAGTTGCCTGTTAGGCTGTTGGTGCTGATGTTCTGGATTCCTGCTTCCAGCAGTGATGTTGTGATGACCCAAACTCCACTCTCCCTGCCTGTCAGTCTTGGAGATCAAGCCTCCATCTCTTGCAGATCTAGTCAGAGCATTGTACATAGTGATGGAAACACCTATTTAGAATGGTACCTGCAGAAGCCAGGCCAGTCTCCAAAGCTCCTGATCTACAAAGTTTCCAACCGATTTTCTGGGGTCCCAGACAGGTTCAGTGGCAGTGGATCAGGGACAGATTTCTCACTCAAGATCAGCAGAGTGGAGACTGAGGATCTGGGAGTTTATTACTGCTTTCAAGCTTCACATGTTCCGTGGACGTTCGGTGGAGGCACCAAGCTGGAAATCAAACGG	IGKV1-117*01	IGKJ1*01	6	98.7	97	98	100	98.1	95
28	S626	2	3	IgA	ATGGCTGTCCTGGCGCTACTCCTCTGCCTGATGACTTTCCCAAGCTGTGCCCTGTCCCAGGTGCAGCTGAAGGAGTCAGGACCTGGCCTGGTGGCGCCCTCACAGAGCCTGTCCATCACATGCACTGTCTCTGGGTTCTCATTAATCAATTATGCTATAAGCTGGGTTCGCCAGCCACCAGGAAAGGGTCTGGAGTGGCTTGGAGTAATATGGACTGGTGGAGGCACAAATTATAATTCAGTTCTCAAATCCAGACTGAGCATCAGCAAAGACAACTCCAAGAGTCAAGTTTTCTTAAAAATGAACAGTCTGCAAACTGATGACACAGCCAGGTACTACTGTGCCAGGTATAGTTACTATACTTACGACGTCGGTTTTGGCTACTGGGGCCAAGGCACC…	IGHV2-9-1*01	IGHD2-12*01	IGHJ2*01	4	100	87.5	100	100	99.1	100	ATGAAGTTGCCTGTTAGGCTGTTGGTGCTGATGTTCTGGATTCCTGCTTCCAGCAGTGATGTTGTGATGACCCAAACTCCACTCTCCCTGCCTGTCAGTCTTGGAGATCAAGCCTCCATCTCTTGCAGATCTAGTCAGAGCATTGTACATAGTGATGGAAACACCTATTTAGAATGGTACCTGCAGAAGCCAGGCCAGTCTCCAAAGCTCCTGATCTACAAAGTTTCCAACCGATTTTCTGGGGTCCCAGACAGGTTCAGTGGCAGTGGATCAGGGACAGATTTCTCACTCAAGATCAGCAGAGTGGAGACTGAGGATCTGGGAGTTTATTACTGCTTTCAAGCTTCACATGTTCCGTGGACGTTCGGTGGAGGCACCAAGCTGGAAATCAAACGG	IGKV1-117*01	IGKJ1*01	6	98.7	97	98	100	98.1	95
29	S627	2	3	IgA	ATGGCTGTCCTGGCGCTACTCCTCTGCCTGATGACTTTCCCAAGCTGTGCCCTGTCCCAGGTACAGCTGAAGGAGTCAGGACCTGGCCTGGTGGCGCCCTCACAGAGCCTGTCCATCACATGCACTGTCTCTGGGTTCTCATTAATCAACTATGCTATAACCTGGGTTCGCCAGCCACCAGGAAAGGGTCTGGAGTGGCTTGGAGTAATATGGACTGGTGGAGGCACACATTATAATTCAGCTCTCAAATCCAGACTGAGCATCAGCAAAGACAACTCCAAGAGTCAAGTTTTCTTAAAAATGAACAGTCTGCAAACTGATGACACAGCCAGGTACTACTGTGCCAGGTATAGTTACTATAGTTACGACGTCGGTTTTGGCTACTGGGGCCAAGGCACC…	IGHV2-9-1*01	IGHD2-12*01	IGHJ2*01	5	98.7	91.7	98	100	99.1	100	ATGAAGTTGCCTGTTAGGCTGTTGGTGCTGATGTTCTGGATTCCTGCTTCCAGCAGTGATGTTGTGATGACCCAAACTCCACTCTCCCTGCCTGTCAGTCTTGGAGATCAAGCCTCCATCTCTTGCAGATCTAGTCAGAGCATTGTACATAGTGATGGAAACACCTATTTAGAATGGTACCTGCAGAAGCCAGGCCAGTCTCCAAAGCTCCTGATCTACAAAGTTTCCAACCGATTTTCTGGGGTCCCAGACAGGTTCAGTGGCAGTGGATCAGGGACAGATTTCTCACTCAAGATCAGCAGAGTGGAGACTGAGGATCTGGGAGTTTATTACTGCTTTCAAGCTTCACATGTTCCGTGGACGTTCGGTGGAGGCACCAAGCTGGAAATCAAACGG	IGKV1-117*01	IGKJ1*01	6	98.7	100	98	100	100	100
30	N113	2	4	IgA	ATGGCTGTCCTGGCGCTACTCCTCTGCCTGATGACTTTCCCAAGCTGTGCCCTGTCCCAGGTGCAGCTGAAGGAGTCAGGACCTGGCCTGGTGGCGCCCTCACAGAGCCTGTCCATCACATGCACTGTCTCTGGATTCTCATTAATCAACTATGCTATAAGTTGGGTTCGCCAGCCACCAAGAAAGGGTCTGGAGTGGCTTGGAGTAATATGGACTGGTGGAGGCACAAATTATAATTCAGCTCTCAAATCCAGACTGAGCATCAGCAAAGACAACTCCAAGAGTCAAGTTTTCTTAAAAATGAACAGTCTGCAAACTGATGACACAGCCAGGTACTACTGTGCCAGAGTCTCCTACTATAGTTACTATAATTACGACGTGAGGTATGGTATGGACTAC…	IGHV2-9-1*01	IGHD2-12*01	IGHJ4*01	5	100	87.5	96.1	100	100	100	ATGAAGTTGCCTGTTAGGCTGTTGGTGCTGATGTTCTGGATTCCTGCTTCCAACAGTGATGTTTTGATGACCCAAACTCCACTCTCCCTGCCTGCCAGTCTTGGAGATCAAGCCTCCATCTCTTGCAGATCTAGTCAGAGCATTGTACATAGTAATGGAAACACCTATTTAGAATGGTACTTGCAGAAACCAGGCCAGTCTCCAAAGCTCCTGATCTACAAAGTTTCCAACCGATTTTCTGGGGTCCCAGACAGGTTCAGTGGCAGTGGATCAGGGACAGATTTCACACTCAAGATCAGCAGAGTGGAGGCTGAGGATCTGGGAGTTTATTACTGCTTTCAAGGTTCACATGTTCCGTGGACGTTCGGTGGAGGCACCAAGCTGGAAATCAAACGG	IGKV1-117*02	IGKJ1*01	2	98.7	100	98	100	99.1	95
31	N130	2	4	IgA	ATGGCTGTCCTGGCGCTACTCCTCTGCCTGATGACTTTCCCAAGCTGTGCCCTGTCCCAGGTGCAGCTGAAGGAGTCAGGACCTGGCCTGGTGGCGCCCTCACAGAGCCTGTCCATCACATGCACTGTCTCTGGGTTCTCATTAATCAACTATGCTATAAGCTGGGTTCGCCAGCCACCAGGAAAGGGTCTGGAGTGGCTTGGAGTTATATGGACTGGTGGAGGCACAAATTATAATTCAGCTCTCAAATCCAGACTGAGCATCAGCAAAGACAACTCCAAGAGTCAAGTTTTCTTAAAAATGAACAGTCTGCAAACCGATGACACAGCCACGTACTACTGTGCCAGATTCCCCTACTATAACTACTATAATGACGACGTGGAAGCTATGGACTACTGG…	IGHV2-9-1*01	IGHD2-12*01	IGHJ4*01	5	100	91.7	98	100	98.2	100	ATGAAGTTGCCTGTTAGGTTGTTGGTGCTGTTGTTCTGGATTCCTGCTGCCAGCAGTGATGTTGTGATGACCCAAACTCCACTCTCCCTGCCTGTCAGTCTTGGAGATCAAGCTTCCATCTTTTGCAGATCTAGTCAGAGCCTTGTACACAGCAATGGAAACACCTATTTAAATTGGTACCTGCAGAAGCCAGGCCAGTCTCCAAAGCTCCTGATCTACAGGGTTTCCAACCGATTTTCTGGGGTCCCAGACAGGTTCAGTGGCAGTGGATCAGGGACAGACTTCACACTCAAGATCAGCAGAGTGGAGGCTGAGGATCTGGGAGTTTATTTCTGCTTTCAAGGTTCACATGTTCCGTGGACGTTCGGTGGAGGCACCAAACTGGAAATCAAACGG	IGKV1-110*02	IGKJ1*01	4	98.7	100	98	100	100	95
32	N146	2	4	IgA	ATGGCTGTCCTGGCGCTACTCCTCTGCCTGATGACTTTCCCAAGCTGTGCCCTGTCCCAGGTGCAGCTGAAGGAGTCAGGACCTGGCCTAGTGGCGCCCTCACAGAGCCTGTCCATCACATGCACTGTCTCTGGGTTCTCATTAACCAACTATGCTATAAGCTGGGTTCGCCAGCCACCAGGAAAGGGTCTGGAGTGGCTTGGAATAATCTGGACTGGTGGAGGCACAAATTATAATTCAGCTCTCAAATCCAGACTGAGCATCAGCAAAGACAACTCCAAGAGTCAAGTTTTCTTAAAAATGAACAGTCTGCAAACTGATGACACAGCCAGGTACTACTGTGCCAGATTCCCCTACTATACTTACTATAGTGACGGCGTGGAAGCTATGGACTACTGG…	IGHV2-9-1*01	IGHD2-12*01	IGHJ4*01	4	98.7	95.8	98	95.2	100	100	ATGAAGTTGCCTGTTAGGTTGTTGGTGCTGTTGTTCTGGATTCCTGGTTCCAGCAGTGATGTTGTGATGACCCAAACTCCACTCTCCCTGCCTGTCAGTCTTGGAGATCAAGCTTCCATCTCTTGTAGATCTAGTCAGAGCCTTGTACACAGCAATGGAAACACCTATTTATATTGGTACCAGCAGAAGCCAGGCCAGTCTCCAAAGCTCCTGATCTACAGGGTTTCCAACCGATTTTCTGGGGTCCCAGACAGGTTCAGTGGCAGTGGATCAGGGACAGATTTCACACTCAAGATCAGCAGAGTGGAGGCTGAGGATCTGGGAGTTTATTTCTGCTTTCAAGGTTCACATGTTCCGTGGACGTTCGGTGGAGGCACCAAGCTGGAAATCAAACGG	IGKV1-110*02	IGKJ1*01	3	98.7	100	98	100	100	90
33	N702	2	4	IgA	ATGGCTGTCCTGGCGCTACTCCTCTGCCTGATGACTTTCCCAAGCTGTGCCCTGTCCCAGGTGCAGCTGAAGGAGTCAGGACCTGGCCTGGTGGCGCCCTCACAGAGCCTGTCCATCACATGCACTGTCTCTGGGTTCTCATTAATCAACTATGCTATAAGCTGGGTTCGCCAGCCACCAGGAAAGGGTCTGGAGTGGCTTGGAGTTATATGGACTGGTGGAGGCACAAATTATAATTCAGCTCTCAAATCCAGACTGAGCATCAGCAAAGACAACTCCAAGAGTCAAGTTTTCTTAAAAATGAACAGTCTGCAAACTGATGACACAGCCACGTACTACTGTGCCAGATTCCCCTACTATAATTACTATAATGACGACGTGGAAGCTATGGACTACTGG…	IGHV2-9-1*01	IGHD2-12*01	IGHJ4*01	4	100	91.7	98	100	99.1	100	ATGAAGTTGCCTGTTAGGTTGTTGGTGCTGTTGTTCTGGATTCCTGGTGCCAGCAGTGATGTTGTGATGACCCAAACTCCACTCTCCCTGCCTGTCAGTCTTGGAGATCAAGCTTCCATGTCTTGCAGATCTAGTCAGAGCCTTGTACACAGCAATGGAAACACCTATTTAAATTGGTACCTGCAGAAGCCAGGCCAGTCTCCAAAGCTCCTGATCTACAGGGTTTCCAACCGATTTTCTGGGGTCCCAGACAGGTTCAGTGGCAGTGGATCAGGGACAGATTTCACACTCAAGATCAGCAGAGTGGAGGCTGAGGATCTGGGAGTTTATTTCTGCTTTCAAGCTTCACATGTTCCGTGGACGTTCGGAGGAGGCACCAAACTGGAAATCAAACGG	IGKV1-110*02	IGKJ1*01	4	98.7	100	100	100	100	95
34	N705	2	4	IgA	ATGGCTGTCCTGGCGCTACTCCTCTGCCTGATGACTTTCCCAAGCTGTGCCCTGTCCCAGGTGCAGCTGAAGGAGTCAGGACCTGGCCTGGTGGCGCCCTCACAGAGCCTGTCCATCACATGCACTGTCTCTGGGTTCTCATTAACCAACTATGCTATAAGCTGGGTTCGCCAGCCACCAGGACAGGGTCTGGAGTGGCTTGGAATAATCTGGACTGGTGGAGGCACAAATTATAATTCAGCTCTCAAATCCAGACTGAGCATCAGCAAAGACAACTCCAAGAGTCAAGTTTTCTTAAAAATGAACAGTCTGCAAACTGATGACACAGCCAGGTACTACTGTGCCAGATTCCCCTACTATACTTACTATAGTGACGGCGTGGAAGCTATGGACTACTGG…	IGHV2-9-1*01	IGHD2-12*01	IGHJ4*01	4	100	95.8	96.1	95.2	100	100	ATGAAGTTGCCTGTTAGGTTGTTGGTGCTGTTGTTCTGGATTCCTGCTTCCAGCAGTGATGTTGTGATGACCCAAACTCCACTCTCCCTGCCTGTCAGTCTTGGAGATCAAGCTTCCATCTCTTGTAGATCTAGTCAGAGCCTTGTACACAGCAATGGAAACACCTATTTATATTGGTACCTGCAGAAGCCAGGCCAGTCTCCAAAGCTCCTGATCTACAGGGTTTCCAACCGATTTTCTGGGGTCCCAGACAGGTTCAGTGGCAGTGGATCAGGGACAGATTTCACACTCAAGATCAGCAGAGTGGAGGCTGAGGATCTGGGAGTTTATTTCTGCTTTCAAGGTTCACATGTTCCGTGGACGTTCGGTGGAGGCACCAAGCTGGAAATCAAACGG	IGKV1-110*02	IGKJ1*01	2	98.7	100	96.1	100	100	90
35	N718	2	4	IgA	ATGGCTGTCCTGGCGCTACTCCTCTGCCTGATGACTTTCCCAAGCTGTGCCCTGTCCCAGGTGCAGCTGAAGGAGTCAGGACCTGGCCTGGTGGCGCCCTCACAGAGCCTGTCCATCACATGCACTGTCTCTGGGTTCTCATTAATCAACTATGCTATAAGCTGGGTTCGCCAGCCACCAGGAAAGGGTCTGGAGTGGCTTGGAGTTATATGGACTGGTGGAGGCACAAATTATAATTCAGCTCTCAAATCCAGACTGAGCATCAGCAAAGACAACTCCAAGAGTCAAGTTTTCTTAAAAATGAACAGTCTGCAAACTGATGACACAGCCACGTACTACTGTGCCAGATTCCCCTACTATAATTACTATAATGACGACGTGGAAGCTATGGACTACTGG…	IGHV2-9-1*01	IGHD2-12*01	IGHJ4*01	4	100	91.7	98	100	99.1	100	ATGAAGTTGCCTGTTAGGTTGTTGGTGCTGTTGTTCTGGATTCCTGGTGCCAGCAGTGATGTTGTGATGACCCAAACTCCACTCTCCCTGCCTGTCAGTCTTGGAGATCAAGCTTCCATGTCTTGCAGATCTAGTCAGAGCCTTGTACACAGCAATGGAAACACCTATTTAAAATGGTACCTGCAGAAGCCAGGCCAGTCTCCAAAGCTCCTGATCTACAGGGTTTCCAACCGATTTTCTGGGGTCCCAGACAGGTTCAGTGGCAGTGGATCAGGGACAGATTTCACACTCAAGATCAGCAGAGTGGAGGCTGAGGATCTGGGAGTTTATTTCTGCTTTCAAGCTTCACATGTTCCGTGGACGTTCGGAGGAGGCACCAAACTGGAAATCAAACGG	IGKV1-110*03	IGKJ1*02	5	94.9	100	98	88.9	100	100
36	N142	2	5	IgA	ATGGGATGGAGCTGGATCTTTCTTTTCCTCCTGTCAGGAACTGCAGGTGTCCATTGCCAGATCCAGCTACAGCAGTCTGGACCTGAGCTGATGAAGCCTGGGGCTGCAGTGAAGATATCCTGCAAGGCTTCTGGCTACACCTTCACTGACTACTATGTAAGCTGGGTGAAGCAGAGGCCTGGACAGGGACTTGAGTGGATTGGATGGATTTATCCTGGAACCGGTAAAACTCACTACAATGAGAAGTTCAAGGGCAAGGGCACATTGACTGTAGACACATCCTCCAGTACAGCCTACATGCAGCTCAGCAGCCTGACCTCTGAGGACTCTGCGGTCTATTTCTGTGCAAGATTTGATTACGACCTTTATTATTATGCTATGGACTACTGGGGTCAAGGA…	IGHV1-84*01	IGHD2-4*01,IGHD2-9*02	IGHJ4*01	11	96	100	96.1	91.7	96.5	100	ATGGAGACAGAGACACTCCTGCTATGGGTGCTACTGCTCTGGGTTCCAGGTTCCACAGGTAAAATTGTGCTGACCCAATCTCCAGCTTCTTTGGCTGTGTCTCTAAGGCAGTGGGCCACCATATCCTGCAGAACCAGTGAAAGTGTTGATAGTTATGGCAATAGTTTTATACACTGGTACCAGCAGAAACCAGGACAGCCACCCAAACTCCTCATCTATCGTGCATCCAACCTAGAATCTGGGGTCCCTGCCAGGTTCAGTGGCAGTGGGTCTAGGACAGACTTCACCCTCACCATTGATCCTGTGGAGGCTGATGATGCTGCAACCTATTACTGTCAGCAAAATAATGAGGATCCGTGGACGTTCGGTGGAGGCACCAAGCTGGAAATCAAACGG	IGKV3-10*01	IGKJ1*01	6	96.2	100	100	88.9	99.1	100
37	S524	2	5	IgA	ATGGGATGGAGCTGGATCTTTCTTTTCCTCCTGTCAGGAACTGCAGGTGTCCATTGCCAGATCCAGCTGCCGCAGTCTGGACCTGAGCTGGTGAAGCCTGGGGCTTCAGTGAAGATATCCTGCAAGGCTTCTGGCTACACCTTCACTGACTACTATATAAACTGGGTGAAGCAGAGGCCTGGACAGGGACTTGAGTGGATTGGATGGATTTATCCTGGAAGCGGTAATACTAAGTACAATGAGAAGTTCAAGGGCAAGGCCACATTGACTGTAGACACATCCTCCAGCACAGCCTACATGCAGCTCAGCAGCCTGACCTCTGAGGACTCTGCGGTCTATTTCTGTGCAAGATTTGATTACGACCTTTATTACTATGCTATGGACTACTGGGGTCAAGGA…	IGHV1-84*01	IGHD2-4*01,IGHD2-9*02	IGHJ4*01	1	98.7	100	100	100	100	100	ATGGAGACAGAGACACTCCTGCTATGGGTGCTACTGCTCTGGGTTCCAGGTTCCACAGGTAAAATTGTGCTGACCCAATCTCCAGCTTCTTTGGCTGTGTCTCTAAGACAGAGGGCCACCATATCCTGCAGAGCCAGTGAAAGTGTTGATAGTTATGGCAATAGTTTTATGCACTGGTACCAGCAGAAACCAGGACAGCCACCCAAACTCCTCATCTATCGTGCATCCAAGCTAGAATCTGGGGTCCCTGCCAGGTTCAGTGGCAGTGGGTCTAGGACAGACTTCACCCTCACCATTGATCCTGTGGAGGCTGATGATGCTGCAACCTATTACTGTCAGCAAAATAATGAGGATCCGTGGACGTTCGGTGGAGGCACTAAGCTGGAAATCAAACGG	IGKV3-10*01	IGKJ1*01	5	97.4	100	100	88.9	99.1	100
38	S525	2	5	IgA	ATGGGATGGAGCTGGATCTTTCTTTTCCTCCTGTCAGGAACTGCAGGTGTCCATTGCCAGATCCAGCTGCAGCAGTCTGGACCTGAGCTGGTGAAGCCTGGGACTTCAGTGAAGATATCCTGCAAGGCTTCTGGCTACACTTTCACTGACTACTATATAAACTGGGTGAAGCAGAGGCCTGGACAGGGACTTGAGTGGATTGGATGGATTTATCCTGGAACCGGTAATACTAAGTACAATGAGAAGTTCAAGGGCAAGGCCACATTGACTGTCGACACATCCTCCAGCACAGCCTACATGCAGCTCAGCAGCCTGACCTCTGAGGACTCTGCGGTCTATTTCTGTGCAAGATTTGATTACGACCTTTATTACTATGCTATGGACTACTGGGGTCAAGGA…	IGHV1-84*01	IGHD2-4*01,IGHD2-9*02	IGHJ4*01	4	98.7	95.8	100	95.8	99.1	100	ATGGAGACAGAGACACTCCTGCTATGGGTGCTACTGCTCTGGGTTCCAGGTTCCACAGGTAAAATTGTGCTGACCCAATCTCCAGCTTCTTTGGCTGTGTCTCTAAGGCAGAGGGCCACCATATCCTGCAGAGCCAGTGAAAGTGTTGATAGTTATGGCAATAGTTTTATGCACTGGTACCAGCAGAAACCAGGACAGCCACCCAAACTCCTCATCTATCGTGCATCCCACCTAGAATCTGGGGTCCCTGCCAGGTTCAGTGGCAGTGGGTCTAGGACAGACTTCACCCTCACCATTGATCCTGTGGAGGCTGATGATGCTGCAACCTATTACTGTCAGCAAAATAATGAGGATCCGTGGACGTTCGGTGGAGGCACCAACCTGGAAATCAAACGG	IGKV3-10*01	IGKJ1*01	4	97.4	100	100	88.9	100	100
39	N110	2	6	IgA	ATGGGATGGAGCTGGGTCTTTCTCTTCCTCCTGTCAGGAACTGCAGGTGTCCACTCTGAGGTCCAGCTGCAACAGTCTGGACCTGAGCTGGTGAAGCCTGGGGCTTCAGTGAAGATGTCCTGTAAGGCTTCTGGATACACATTCACTGACTACTACATGAACTGGGTGAAGCAGAGTCATGGAAAGAGCCTTGAGTGGATTGGACGTGTTAGTCCTAGCACTGGTGGTACTAGCTACAACCAGAAGTTCAAGGGCAAGGCCACATTGACAGTAGACAAATCCCTCAGCACAGCCTACATGCAGCTCAACAGCCTGACATCTGAGGACTCTGCGGTCTATTACTGTGGAAGATATGATTACGACCTATATTACTATGCTATGGACTACTGGGGTCAAGGA…	IGHV1-19*01	IGHD2-4*01,IGHD2-9*02	IGHJ4*01	19	98.7	95.8	94.1	75	93.9	83.3	ATGGAGACAGAGACACTCCTGCTATGGGTGCTACTGCTCTGGGTTCCAGGTTCCACAGGTAAAATTGTGCTGACCCAATCTCCAGCTTCTTTGGCTGTGTCTCTAAGGCAGAGGGCCACCATATCCTGCAGAGCCAGTGAAAGTGTTGATAGTTATGGCAATAGTTTTATGCACTGGTACCAGCAGAAACCAGGACAGCCACCCAAACTCCTCATCTATCGTGCATCCAACCTAGAATCTGGGGTCCCTGCCAGGTTCAGTGGCAGTGGGTCTAGGACAGACTTCACCCTCACCATTGATCCTGTGGAGGCTGATGATGCTGCAACCTATTACTGTCAGCAAAATAATGAGGATCCGTGGACGTTCGGTGGAGGCACCAAGCTGGAAATCAAACGG	IGKV3-10*01	IGKJ1*01	3	97.4	100	98	88.9	99.1	100
40	N230	2	6	IgA	ATGGGATGGAGCTGGGTCTTTCTCTTCCTCCTGTCAGGAACTGCAGGTGTCCACTCTGAGGTCCAGCTGCAACAGTCTGGACCTGAGCTGGTGAAGCCTGGGGCTTCAGTGAAGATGTCCTGTAAGGCTTCTGGATACACATTCACTGACTATTACATGAACTGGGTGAAGCAGAGTCATGGAAAGAGCCTTGAGTGGATTGGACGTGTTAATCCTAGCAATGGTGGTACTAGCTACAACCAGAAGTTCAAGGGCAAGGCCACATTGACTGTAGACAAATCCCTCAGCACAGCCTACATGCAGCTCAACAGCCTGACATCTGAGGACTCTGCGGTCTATTACTGTGCAAGATATGATTACGACCTATATTTCTATGCTATGGACTTCTGGGGTCAAGGA…	IGHV1-19*01	IGHD2-4*01,IGHD2-9*02	IGHJ4*01	16	98.7	91.7	94.1	83.3	94.7	100	ATGGAGACAGAGACACTCCTGCTATGGGTGCTACTGCTCTGGGTTCCAGGTTCCACAGGTAAAATTGTGCTGACCCAATCTCCAGCTTCTTTGGCTGTGTCTCTAAGGCAGAGGGCCACCATATCCTGCAGAGCCAGTGAAAGTGTTGATAGTTATGGCAATAGTTTTGTGCACTGGTACCAGCAGAAACCAGGACAGCCACCCAAACTCCTCATCTATCGTGCATCCAACCTAGATTCTGGGGTCCCTGCCAGGTTCAGTGGCAGTGGGTCTAGGACAGACTTCACCCTCACCATTGATCCTGTGGAGGCTGATGATGCTGCAACCTATTACTGTCAGCAAAATAATGAGGATCCGTGGACGTTCGGTGGAGGCACCAAGCTGGAAATCAAACGG	IGKV3-10*01	IGKJ1*01	5	97.4	100	98	88.9	99.1	100
41	S521	2	6	IgA	ATGGGATGGAGCTGGGTCTTTCTCTTCCTCCTGTCAGGAACTGCAGGTGTCCACTCTGAGGTCCAGCTGCAACAGTCTGGACCTGAACTGGTGAAGCCTGGGGCTTCAGTGAAGATGTCCTGTAAGGCTTCTGGATACACATTCACTGACTACTACATGAACTGGGTGAAGCAGAGTCATGGAAAGAGCCTTGAGTGGATTGGACGTGTTAGTCCTAGCACTGGTGGTACTAGCTACAACCAGAAGTTCAAGGGCAAGGCCACATTGACAGTAGACAAATCCCTCAGCACAGCCTACATGCAGCTCAACAGCCTGACATCTGAGGACTCTGCGGTCTATTACTGTGGAAGATATGATTACGACCTATATTACTATGCTATGGACTACTGGGGTCAAGGA…	IGHV1-19*01	IGHD2-4*01,IGHD2-9*02	IGHJ4*01	20	97.3	95.8	94.1	75	93.9	83.3	ATGGAGACAGAGACACTCCTGCTATGGGTGCTACTGCTCTGGGTTCCAGGTTCCACAGGTAAAATTGTGCTGACCCAATCTCCAGCTTCTTTGGCTGTGTCTCTAAGGCAGAGGGCCACCATATCCTGCAGAGCCAGTGAAAGTGTTGATAGTTATGGCAATAGTTTTATGCACTGGTACCAGCAGAGACCAGGACAGCCACCCAAACTCCTCATCTATCGTGCATCCAACCTAGAATCTGGGGTCCCTGCCAGGTTCAGTGGCAGTGGGTCTAGGACAGACTTCACCCTCACCATTGATCCTGTGGAGCCTGATGATGCTGCAACCTATTACTGTCAGCAAAATAATGAGGATCCGTGGACGTTCGGTGGAGGCACCAAGCTGGAAATCAAACGG	IGKV3-10*01	IGKJ1*01	5	97.4	100	98	88.9	99.1	100
42	S533	2	6	IgA	ATGGGATGGAGCTGGGTCTTTCTCTTCCTCCTGTCAGGAACTGCAGGTGTCCACTCTGAGGTCCAGCTGCAACAGTCTGGACCTGAACTGGTGAAGCCTGGGGCTTCAGTGAAGATGTCCTGTAAGGCTTCTGGATACACATTCACTGACTACTACATGAACTGGGTGAAGCAGAGTCATGGAAAGAGCCTTGAGTGGATTGGACGTGTTAGTCCTAGCACTGGTGGTACTAGCTACAACCAGAAGTTCAAGGGCAAGGCCACATTGACAGTAGACAAATCCCTCAGCACAGCCTACATGCAGCTCAACAGCCTGACATCTGAGGACTCTGCGGTCTATTACTGTGGAAGATATGATTACGACCTATATTACTATGCTATGGACTACTGGGGTCAAGGA…	IGHV1-19*01	IGHD2-4*01,IGHD2-9*02	IGHJ4*01	20	97.3	95.8	94.1	75	93.9	83.3	ATGGAGACAGAGACACTCCTGCTATGGGTGCTACTGCTCTGGGTTCCAGGTTCCACAGGTAAAATTGTGCTGACCCAATCTCCAGCTTCTTTGGCTGTGTCTCTAAGGCAGAGGGCCACCATATCCTGCAGAGCCAGTGAAAGTGTTGATAGTTATGGCAATAGTTTTATGCACTGGTACCAGCAGAGACCAGGACAGCCACCCAAACTCCTCATCTATCGTGCATCCAACCTAGAATCTGGGGTCCCTGCCAGGTTCAGTGGCAGTGGGTCTAGGACAGACTTCACCCTCACCATTGATCCTGTGGAGCCTGATGATGCTGCAACCTATTACTGTCAGCAAAATAATGAGGATCCGTGGACGTTCGGTGGAGGCACCAAGCTGGAAATCAAACGG	IGKV3-10*01	IGKJ1*01	5	97.4	100	98	88.9	100	90.9
43	N103	2	7	IgA	ATGGGATGGAACTGGATCTTTATTTTAATCCTGTCAGTAACTACAGGTGTCCACTCTGAGGTCCAGCTGCAGCAGTCTGGACCTGAGCTGGTGAAGCCTGGGGCTTCAGTGAAGATATCCTGCAAGGCTTCTGGTTACTCATTCACTGACTACTACATGCACTGGGTGAAGCAAAGTCCTGAAAAGAGCCTTGAGTGGATTGGAGAGATTAATCCTAGCACTGGTGGTACTACCTACAACCAGAAGTTCAAGGCCAAGGCCACATTGACTGTAGAGAAATCCTCCAGCACAGCCTACATGCAGCTCCAGAGCCTGACATCTGAGGACTCTGCAGTCTATTACTGTGCAAGATATGATAGTAACCTTTATTACTATGCTATGGACTACTGGGGTCAAGGA…	IGHV1-42*01	IGHD2-5*01,IGHD2-6*01	IGHJ4*01	4	100	95.8	98	100	98.2	100	ATGGAGACAGAGACACTCCTGCTATGGGTGCTACTGCTCTGGGTTCCAGGTTCCACAGGTAAAATTGTGCTGACCCAATCTCCAGCTTCTTTGGCTGTGTCTCTAAGGCAGAGGGCCACCATATCCTGCAGAGCCAGTGAAAGTGTTGATAGTTATGGCAATAGTTTTATGTACTGGTACCAGCAGAAACCAGGACAGCCACCCAAACTCCTCATCTATCGTGCATCCAACCTAGAATCTGGGGTCCCTGCCAGGTTCAGTGGCAGTGGGTCTAGGACAGACTTCACCCTCACCATTGATCCTGTGGAGGCTGATGATGCTGCAACCTATTACTGTCAGCAGAATTATGAGGATCCTCGGACGTTCGGTGGAGGCACCAAGCTGGAAATCAAGCGG	IGKV3-10*01	IGKJ1*01	6	97.4	100	100	88.9	100	100
44	N704	2	8	IgA	ATGGGATGGAGCTGGGTCTTTCTCTTCCTCCTGTCAGGAACTGCAGGTGTCCACTCTGAGGTCCAGCTGCAACAGTCTGGACCTGAGCTGGTGAAGCCTGGGGCTTCAGTGAAGATGTCCTGTAAGGCTTCTGGATACACATTCACTGACTACTACATGAATTGGGTGAAGCAGAGTCATGGAAAGAGCCTTGAGTGGATTGGACATGTTAATCCTAGCAATGGTTATACTACCTACAACCAGAAGTTCAAGGGCAAGGCCACATTGACAGTAGACAAATCCCTCAGCACAGCCTACATGCAGCTCAACAGCCTGACATCTGAGGACTCCGCGGTCTATTACTGTGGAAGATATGATTACGACCTATATTTCTATGCTATGGACTACTGGGGTCCAGGA…	IGHV1-26*01	IGHD2-4*01,IGHD2-9*02	IGHJ4*01	21	97.3	95.8	94.1	83.3	91.2	83.3	ATGGAGACAGAGACACTCCTGCTATGGGTGCTACTGCTCTGGGTTCCAGGTTCCACAGGTAAAATTGTGCTGACCCAATCTCCAGCTTCTTTGGCTGTGTCTCTAAGGCAGAGGGCCACCATATCCTGCAGAGCCAGTGAAAGTGTTGATAGTTATGGCAATAGTTTTATGCACTGGTACCAGCAGAAACCAGGACAGCCACCCAAACTCCTCATCTATCGTGCATCCAACCTAGAATCTGGGGTCCCTGCCAGGTTCAGTGGCAGTGGGTCTAGGACAGACTTCACCCTCACCATTGATCCTGTGGAGGCTGATGATGCTGCAACCTATTACTGTCAGCAAAATAATGAGGATCCGTGGACGTTCGGTGGAGGCACCAAGCTGGAAATCAAACGG	IGKV3-10*01	IGKJ1*01	3	96.2	100	98	77.8	94.4	100
45	N102	2	9	IgA	ATGAACTTCGGGCTCACCTTGATTTTCCTTGTCCTTACTTTAAAAGGTGTCCAGTGTGAGGTGCAACTGGTGGAGTCTGGGGGAGGCTTAGTGAAGCCTGGAGGGTCCCTGAAACTCTCCTGTGCAGCCTCTGGATTCATTTTCAGTAGTTATGCCATGTCTTGGGTTCGCCAGACTCCAGAGAAGAGGCTGGAGTGGGTCGCAGCCATTAATAGTAATGGTGGTAGCACCTACTATCCAGACACTGTGAAGGACCGATTCACCATCTCCAGAGACAATGCCAAGAATACCCTGTACCTGCAAATGAGCAGTCTGAGGTCTGAGGACACAGCCTTGTATTACTGTGCTAGACATAATAGTAACTACGTTGACTATGCTATGGACTACTGGGGTCAAGGA…	IGHV5-6-2*01	IGHD2-5*01,IGHD2-6*01	IGHJ4*01	14	93.3	83.3	98	100	97.4	87.5	ATGGATTTTCAGGTGCAGATTTTCAGCTTCCTGCTAATCAGTGCCTCAGTCATAATGTCCAGAGGACAAGTTGTTCTCTCCCAGTCTCCAGCAATCATGTCTGCATCTCCAGGGCAGAAAGTCACCATAACCTGCAGTGCCAGCTCAAGTGTAAATTACATGCACTGGTACCAGCAGAAGCTAGGATCCTCCCCCAAACTCTGGATTTATGACACATCCAAACTGGCTCCTGGAGTCCCTGCTCGCTTCAGTGGCAGTGGGTCTGGGACCTCTTACTCTCTCACAATCAGCAGCATGGAGGCTGAAGATGCTGCCTCTTATTTCTGCCATCAGTGGAGTAGTTATACGTTCGGATCGGGGACCAAGCTGGAAATAAAACGG	IGKV4-56*01	IGKJ2*03	12	97.4	100	98	77.8	94.4	100
46	N126	2	9	IgA	ATGAACTTCGGGCTCACCTTGATTTTCCTTGTCCTTACTTTAAAAGGTGTCCAGTGTGAGGTGCAGCTGGTAGAGTCTGGGGGAGGCTTAGTGAAGCCTGGAGGGTCCCTGAAACTCTCCTGTGCAGCCTCTGGATTCACTTTCAGTAGCTATGCCATGTCTTGGGTTCGCCAGACTCCAGAGAAGAGGCTGGAGTGGGTCGCAGCCATTAATAGTAATGGTGGTTACACCTACTATCCAGACACTGTGAAGGACCGATTCACCATCTCCAGAGACAATGCCAAGAACACCCTGTACCTGCAAATGAGCAGTCTGAGGTCTGAGGACACAGCCTTGTATTACTGTGCAAGACATAATAGTAACTACGTTGACTATGCTATGGACTACTGGGGTCAAGGA…	IGHV5-6-2*01	IGHD2-5*01,IGHD2-6*01	IGHJ4*01	12	93.3	91.7	98	91.7	98.2	100	ATGGATTTTCAGGTGCAGATTTTCAGCTTCCTGCTAATCAGTGCCTCAGTCATAATGTCCAGAGGACAAATTGTTTTCACCCAGTCTCCAGCAATCATGTCTGCATCTCCAGGGCAGAAAGTCACCATAACCTGCAGTGCCACCTCAAGTGTAAATTACATGCACTGGTACCAGCAGAAGCTAGGATCCTCCCCCAAACTCTGGATTTATGACACATCCAAACTGGCTCCTGGAGTCCCTGCTCGCTTCAGTGGCAGTGGGTCTGGGACCTCTTACTCTCTCACAATCAGCAGCATGGAGGCTGAAGATGCTGCCTCTTATTTCTGCCATCAGTGGAGTAGTTATACGTTCGGATCGGGGACCAAGCTGGAAATAAAACGG	IGKV4-56*01	IGKJ2*03	11	100	100	94.1	100	97.2	100
47	L009	3	10	IgA	ATGAAATGCAGCTGGGTCATCTTCTTCCTGATGGCAGTGGTTATAGGGGTCACTTCAGAGGTTCAGCTGCAGCAGTCTGGGGCAGAGCTTGTGAGGCCAGGGGCCTCAGTCAAGTTGTCCTGCACAGCTTCTGGCTTCAACATTAAAGACAGCCTTATGCACTGGGTGAAGCAGAGGCCTGAACAGGGCCTGGAGTGGATTGGATGGATTGATCCTGAGGATGGTGAAACTAAATATGCCCCGAAGTTCCGGGACAAGGCCACTGTAACTTCAGACACATCCTCCAATACAGCCTACCTGCAGCTCAGCAGCCTGACATCTGAGGACACTGCCATCTATTACTGTACTCGCGATTACTACGCTGGTAGTCCCTATGCTATGGACTACTGGGGTCAAGGA…	IGHV14-1*01	IGHD1-1*01,IGHD1-1*02	IGHJ4*01	14	100	83.3	98	95.8	93	100	ATGGAATCACAGACTCTGGTCTTCATATCCATACTGCTCTGGTTATATGGTGCTGATGGGAACATTGTAATGACCCAATCTCCCAAATCCATGTCCATGTCAGTAGGAGAGAGGGTCACCTTGAGCTGCAAGGCCAGTGAGAATGTGGGTACTTATGTATCATGGTATCAACAGAAACCAGAACAGTCTCCTAAAGTGCTGATATACGGGGCATCCAACCGGTACACTGGGGTCCCCGATCGGTTCACAGGCAGTGGATCTGTAACAGATTTCACTCTGACCATCAGCAGTGTGCAGGCTGAAGACCTTGCAGATTATTACTGTGGACAGAGTTACAGCTATCCTCTCACGTTCGGTGCTGGGACCAAGCTGGAGCTGAAACGG	IGKV6-20*01	IGKJ5*01	6	100	100	100	100	97.2	100
48	L020	3	10	IgA	ATGAAATGCAGCTGGGTCATCTTCTTCCTGATGGCAGTGGTTATAGGGGTCAATTCAGAGGTTCAGCTGCAGCAGTCTGGGGCAGAGCTTGTGAGGCCAGGGGCCTCAGTCAAATTGTCCTGCACAGCTTCTGGCTTCAACATTAAAGACAGCCTTATGCACTGGGTGAAGCAGAGGCCTGAACAGGGCCTGGAGTGGATTGGATGGATTGATCCTGAGGATGGTGAAACTAAATGTGCCCCGAAGTTCCAGGACAAGGCCGCTGTAACTGCAGACACATCCTCCAACACAGCCTACCTGCAGCTCAGCAGCCTGACATCTGAGGACACTGCCATCTATTACTGTACTCGCGATTACTACGATGGTAGCCCCTATGCTATGGACTACTGGGGTCAAGGA…	IGHV14-1*01	IGHD1-1*01,IGHD1-1*02	IGHJ4*01	14	98.7	83.3	98	95.8	93.9	100	ATGGAATCACAGACTCTGGTCTTCATATCCATACTGCTCTGGTTATATGGTGCTGATGGGAACATTGTAATGACCCAATCTCCCAAATCCATGTCCATGTCAGTAGGAGAGAGGGTCACCTTGAGCTGCAAGGCCAGTGAGAATGTGGGTACTTATGTATCCTGGTATCAACAGAAACCAGAGCAGTCTCCTAAACTGCTGATATACGGGGCATCCAACCGGTACACTGGGGTCCCCGATCGGTTCACAGGCAGTGGATCTGTAACAGATTTCACTCTGACCATCAGCAGTGTGCAGGCTGAAGACCTTGCAGATTATTACTGTGGACAGAGTTACAGCTATCCTCTCACGTTCGGTGCTGGGACCAAGCTGGAGCTGAAACGG	IGKV6-20*01	IGKJ5*01	3	98.7	94.4	98	100	97.2	100
49	L022	3	10	IgA	ATGAAATGCAGCTGGGTCATCTTCTTCCTGATGGCAGTGGTTATAGGGGTCAATTCAGAGGTTCAGCTGCAGCAGTCTGGGGCAGAGCTTGTGAGGCCAGGGGCCTCAGTCAAGTTGTCCTGCACAGCTTCTGGCTTCAACATTAAAGACAGCCTTATGCACTGGGTGAAGCAGAGGCCTGAACAGGGCCTGGAGTGGATTGGATGGATTGATCCTGAGGATGGTGAAACTAAATATGCCCCGAAGTTCCAGGGCAAGGCCACTCTAACTGCAGACGCATCCTCCAACACAGCCTACCTGCAGCTCAGCAGCCTGACATCTGAGGACACTGCCATCTATTACTGTGCTCGCGATTACTACGGTGGTAGCCCCTATGCTATGGACTACTGGGGTCAAGGA…	IGHV14-1*01	IGHD1-1*01,IGHD1-1*02	IGHJ4*01	12	100	83.3	98	95.8	95.6	66.7	ATGGAATCACAGACTCTGGTCTTCATATCCATACTGCTCTGGTTATATGGTGCTGATGGGAACATTGTAATGACCCAATCTCCCAAATCCATGTCCATGTCAGTAGGGGAGAGGGTCACCTTGAGCTGCAAGGCCAGTGAGAATGTGGGTTCTTATGTATCCTGGTATCAACAGAAACCAGAGCAGTCTCCTAAACTACTGATATACGGGGCATCCAACCGATACACTGGGGTCCCCGATCGCTTCACAGGCAGTGGATCTGCAACAGATTTCACTCTGACCATCAGCAGTGTGCAGGCTGAAGACCTTGTAGATTATTACTGTGGACAGAGTTACAGCTATCCTCTCACGTTCGGTGCTGGGACCAAGCTGGAGCTGAAACGG	IGKV6-20*01	IGKJ5*01	6	96.2	88.9	98	100	97.2	100
50	N114	3	10	IgA	ATGAAATGCAGCTGGGTCATCTTCTTCCTGATGGCAGTGGTTATAGGGGTCAATTCAGAGGTTCAGCTGCAGCAGTCTGGGGCAGAGCTTGTGAGGCCAGGGGCCTCAGTCAAGTTGTCCTGCACAGCTTCTGGCTTCAACATTAAAGACAGCCTTATGCACTGGGTGAAGCAGAGGCCTGAACAGGGCCTGGAGTGGATTGGCTGGATTGATATTGAAGATGGTGAAACTAAATATGCCCCGAAGTTCCAGGACAAGGCCACTATAACTGCAGACACATCCTCCAACACAGCCTACCTGCAACTCAGCAGCCTGACATCTGAGGACACTGCCGTCTATTACTGTACTCGCGATTACTACGGTGGTACCCCCTATACTATGGACAACTGGGGTCAAGGA…	IGHV14-1*01	IGHD1-1*01,IGHD1-1*02	IGHJ4*01	14	100	83.3	96.1	83.3	96.5	100	ATGGAATCACAGACTCTGGTCTTCATATCCATACTGCTCTGGTTATATGGTGCTGATGGGAACATTGTTATGACCCAATCTCCCAGATCCATGTCCATGTCAGTAGGAGAGAGGGTCACCTTGAGCTGCAGGGCCAGTGAAATTGTGGGTACTTATGTATCCTGGTATCAACAGAAAGCAGAGCAGTCTCCTAAACTGCTGATATACGGGGCATCCAACCGGTACACTGGGGTCCCCGATCGCTTCACAGGCAGTGGATCTGTTACAGATTTCACTCTGACCATCAGCAGTGTGCAGGCTGAAGACCTTGCAGATTATTACTGTGGACAGAGTTACAGCTATCCTCTCACGTTCGGTGCTGGGACCAAGCTGGAGCTGAAACGG	IGKV6-20*01	IGKJ5*01	9	98.7	94.4	100	100	98.1	100
51	N124	3	10	IgA	ATGAAATGCAGCTGGGTCATCTTCTTCCTGATGGCAGTGGTTATAGGGGTCAATTCAGAGGTTCAGCTGCAGCAGTCTGGGGCAGAGCTTGTGAGGCCAGGGGCCTCAGTCAAGTTGTCCTGCACAGCTTCTGGCTTCAACATTAAAGACAGCCTTATGCACTGGGTGAAGCAGAGGCCTGAACAGGGCCTGGAGTGGATTGGCTGGATTGATATTGAAGATGGTGAAACTAAATATGCCCCGAAGTTCCAGGACAAGGCCACTATAACTGCAGACACATCCTCCAACACAGCCTTCCTGCAGCTCAGCAGCCTGACATCTGAGGACACTGCCATCTATTACTGTGCTCGCGATTACTACGGTGGTAGCCCCTATGCTATGGACAACTGGGGTCAAGGA…	IGHV14-1*01	IGHV14-1*01,IGHV14-2*01,IGHV14-3*01	IGHD1-1*01,IGHD1-1*02	16	100	83.3	96.1	83.3	95.6	66.7	ATGGAATCACAGACTCTGGTCTTCATATCCATACTGCTCTGGTTATATGGTGCTGATGGGAACATTGTAATGACCCAATCTCCCAGATCCATGTCCATGTCAGTAGGAGAGAGGGTCACCTTGAGCTGCAAGGCCAGTGAGATTGTGGGTACTTATGTATCCTGGTATCAACAGAAACCAGAGCAGTCTCCTAAACTGCTGATATACGGGGCATCCAACCGGTACACTGGGGTCCCCGATCGCTTCACAGGCAGTGGATCTGTAACAGATTTCACTCTGACCATCAGCAGTGTGCAGGCTGAAGACCTTGCAGATTATTACTGTGGACAGAGTTACAGCTATCCTCTCACGTTCGGTGCTGGGACCAAGCTGGAGCTGAAACGG	IGKV6-20*01	IGKJ5*01	4	100	100	100	100	96.3	100
52	N127	3	10	IgA	ATGAAATGCAGCTGGGTCATCTTCTTCCTGATGGCAGTGGTTATAGGGGTCAATTCAGAGGTTCAGCTGCAGCAGTCTGGGGCAGAGCTTGTGAGGCCAGGGGCCTCAGTCAAATTGTCCTGCACAGCTTCTGGCTTCAACATTAAAGACAGCCTTATGCACTGGGTGAAGCAGAGGCCTGAACAGGGCCTGGAGTGGATTGGATGGATTGATCCTGAGGATGGTGAAACTAAATGTGCCCCGAAGTTCCAGGACAAGGCCGCTGTAACTGCAGACACATCCTCCAACACAGCCTACCTGCAGCTCAGCAGCCTGACATCTGAGGACACTGCCATCTATTACTGTACTCGCGATTACTACGATGGTAGCCCCTATGCTATGGACTACTGGGGTCAAGGA…	IGHV14-1*01	IGHD1-1*01,IGHD1-1*02	IGHJ4*01	14	98.7	83.3	98	95.8	93.9	100	ATGGAATCACAGACTCTGGTCTTCATATCCATACTGCTCTGGTTATATGGTGCTGATGGGAACATTGTAATGACCCAATCTCCCAAATCCATGTCCATGTCAGTAGGAGAGAGGGTCACCTTGAGCTGCAAGGCCAGTGAGAATGTGGGTACTTATGTATCCTGGTATCAACAGAAACCAGAGCAGTCTCCTAAACTGCTGATATACGGGGCATCCAACCGGTACACTGGGGTCCCCGATCGGTTCACAGGCAGTGGATCTGTAACAGATTTCACTCTGACCATCAGCAGTGTGCAGGCTGAAGACCTTGCAGATTATTATTGTGGACAGAGTTACAGCTATCCTCTCACGTTCGGTGCTGGGACCAAGCTGGAGCTGAAACGG	IGKV6-20*01	IGKJ5*01	4	100	100	98	100	97.2	100
53	N133	3	10	IgA	ATGAAATGCAGCTGGGTCATCTTCTTCCTGATGGCAGTGGTTATAGGGGTCAATTCAGAGGTTCAGCTGCAGCAGTCTGGGGCAGAGCTTGTGAGGCCAGGGGCCTCAGTCAAGTTGTCCTGCACAGCTTCTGGCTTCAACATTAAAGACAGCCTTATGCACTGGGTGAAGCAGAGGCCTGAACAGGGCCTGGAGTGGATTGGATGGATTGATCCTGAGGATGGTGAAACTAAATATGCCCCGAAGTTCCAGGACAAGGCCACTGTAACTGCAGACACATCCTCCAACACAGCCTACCTGCAGCTCAGCAGCCTGACATCTGAGGACACTGCCATCTATTACTGTACTCGCGATTACTACGATGGTAGCCCCTATGCTATGGACTTCTGGGGTCAAGGA…	IGHV14-1*01	IGHD1-1*01,IGHD1-1*02	IGHJ4*01	11	100	83.3	98	95.8	95.6	100	ATGGAATCACAGACTCTGGTCTTCATATCCATACTGCTCTGGTTATATGGTGCTGATGGGAACATTGTAATGACCCAATCTCCCAAATCCATGTCCATGTCAGTAGGAGAGAGGGTCACCTTGAGCTGCAAGGCCAGTGAGAATGTGGGTACTTATGTATCCTGGTATCAACAGAAACCAGAACAGTCTCCTAAACTGCTGATATACGGGGCATCCAACCGGTACACTGGGGTCCCCGATCGGTTCACAGGCAGTGGATCTGTAACAGATTTCACTCTGACCATCAGCAGTGTGCAGGCTGAAGACCTTGCAGATTATTACTGTGGACAGAGTTACAGCTATCCTCTCACGTTCGGTGCTGGGACCAAGCTGGAGCTGAAACGG	IGKV6-20*01	IGKJ5*01	4	100	100	94.1	100	97.2	100
54	N136	3	10	IgA	ATGAAATGCAGCTGGGTCATCTTCTTCCTGATGGCAGTGGTTATAGGGGTCAATTCAGAGGTTCAGCTGCAGCAGTCTGGGGCAGAGCTTGTGAGGCCAGGGGCCTCAGTCAAGTTGTCCTGCACAGCTTCTGGCTTCAACATTAAAGACAGCCTTATGCACTGGGTGAAGCAGAGGCCTGAACAGGGCCTGGAGTGGATTGGATGGATTGATCCTGAGGATGGTGAAACTAAATATGCCCCGAAGTTCCGGGACAAGGCCACTGTAACTTCAGACACATCCTCCAACACAGCCTACCTGCAGCTCAGCAGCCTGACATCTGAGGACACTGCCATCTATTACTGTACTCGCGATTACTACGCTGGTAGCCCCTATGCTATGGACTACTGGGGTCAAGGA…	IGHV14-1*01	IGHD1-1*01,IGHD1-1*02	IGHJ4*01	13	100	83.3	98	95.8	93.9	100	ATGGAATCACAGACTCTGGTCTTCATATCCATACTGCTCTGGTTATATGGTGCTGATGGGAACATTGTAATGACCCAATCTCCCAAATCCATGTCCATGTCAGTAGGAGAGAGGGTCACCTTGAGCTGCAAGGCCAGTGAGAATGTGGGTACTTATGTATCATGGTATCAACAGAAACCAGAGCAGTCTCCTAAAGTACTGATATACGGGGCATCCAACCGGTACACTGGGGTCCCCGATCGGTTCACAGGCAGTGGATCTGTAACAGATTTCACTCTGACCATCAGCAGTGTGCAGGCTGAAGACCTTGCAGATTATTACTGTGGACAGAGTTACAGCTATCCTCTCACGTTCGGTGCTGGGACCAAGCTGGAGCTGAAACGG	IGKV6-20*01	IGKJ5*01	6	100	100	98	100	97.2	100
55	N140	3	10	IgA	ATGAAATGCAGCTGGGTCATCTTCTTCCTGATGGCAGTGGTTATAGGGGTCAATTCAGAGGTTCAGCTGCAGCAGTCTGGGGCAGAGCTTGTGAGGCCAGGGGCCTCAGTCAAGTTGTCCTGCACAGCTTCTGGCTTCAACATTAAAGACAGCCTTATGCACTGGGTGAAGCAGAGGCCTGAACAGGGCCTGGAGTGGATTGGATGGATTGATCCTGAGGATGGTGAAACTAAATATGCCCCGAAGTTCCAGGACAAGGCCACTGTAACTGCAGACACATCCTCCAACACAGCCTACCTGCAGCTCAGCAGCCTGACATCTGAGGACACTGCCATCTATTACTGTACTCGCGATTACTACGATGGTAGCCCCTATGCTATGGACTACTGGGGTCAAGGA…	IGHV14-1*01	IGHD1-1*01,IGHD1-1*02	IGHJ4*01	11	100	83.3	98	95.8	95.6	100	ATGGAATCACAGACTCTGGTCTTCATATCCATACTGCTCTGGTTATATGGTGCTGATGGGAACATTGTAATGACCCAATCTCCCAAATCCATGTCCATGTCAGTAGGAGAGAGGGTCACCTTGAGCTGCAAGGCCAGTGAGAATGTGGGTACTTATGTATCCTGGTATCAACAGAAACCAGAGCAGTCTCCTAGACTGCTGATATACGGGGCATCCAACCGGTACACTGGGGTCCCCGATCGGTTCACAGGCAGTGGATCTGTAACAGATTTCACTCTGACCATCAGCAGTGTGCAGGCTGAAGACCTTGCAGATTATTACTGTGGACAGAGTTACAGCTATCCTCTCACGTTCGGTGCTGGGACCAAGCTGGAGCTGAAACGG	IGKV6-20*01	IGKJ5*01	4	100	100	98	100	97.2	100
56	N145	3	10	IgA	ATGAAATGCAGCTGGGTCATCTTCTTCCTGATGGCAGTGGTTATAGGGGTCAATTCAGAGGTTCAGCTGCAGCAGTCTGGGGCAGAGCTTGTGAGGCCAGGGGCCTCAGTCAAGTTGTCCTGCACAGCTTCTGGCTTCAACATTAAAGACAGCCTTATGCACTGGGTGAAGCAGAGGCCTGAACAGGGCCTGGAGTGGATTGGATGGATTGATCCTGAGGATGGTGAAACTAAATATGCCCCGAAGTTCCAGGACAAGGCCACTGTAACTGCAGACACATCCTCCAACACAGCCTACCTGCAGCTCAGCAGCCTGACATCTGAGGACACTGCCATCTATTACTGTACTCGCGATTACTACGATGGTAGCCCCTATGCTATGGACTTCTGGGGTCAAGGA…	IGHV14-1*01	IGHD1-1*01,IGHD1-1*02	IGHJ4*01	11	100	83.3	98	95.8	95.6	100	ATGGAATCACAGACTCTGGTCTTCATATCCATACTGCTCTGGTTATATGGTGCTGATGGGAACATTGTAATGACCCAATCTCCCAAATCCATGTCCATGTCAGTAGGAGAGAGGGTCACCTTGAGCTGCAAGGCCAGTGAGAATGTGGGTACTTATGTATCCTGGTATCAACAGAAACCAGAACAGTCTCCTAAACTGCTGATATACGGGGCATCCAACCGGTACACTGGGGTCCCCGATCGGTTCACAGGCAGTGGATCTGTAACAGATTTCACTCTGACCATCAGCAGTGTGCAGGCTGAAGACCTTGCAGATTATTACTGTGGACAGAGTTACAGCTATCCTCTCACGTTCGGTGCTGGGACCAAGCTGGAGCTGAAACGG	IGKV6-20*01	IGKJ5*01	4	98.7	100	100	100	97.2	100
57	N206	3	10	IgA	ATGAAATGCAGCTGGGTCATCTTCTTCCTGATGGCAGTGGTTATAGGGGTCAATTCAGAGGTTCAGCTGCAGCAGTCTGGGGCAGAGCTTGTGAGGCCAGGGGCCTCAGTCAAGTTGTCCTGCACAGCTTCTGGCTTCAACATTAAAGACAGCCTTATGCACTGGGTGAAGCAGAGGCCTGAACAGGGCCTGGAGTGGATTGGATGGATTGATCCTGAGGATGGTGAAACTAAATATGCCCCGAAGTTCCAGGACAAGGCCACTGTAACTGCAGACACATCCTCCAACACAGCCTACCTGCAGCTCAGCAGCCTGACATCTGAGGACACTGCCATCTATTACTGTACTCGCGATTACTACGATGGTAGCCCCTATGCTATGGACTACTGGGGTCAAGGA…	IGHV14-1*01	IGHD1-1*01,IGHD1-1*02	IGHJ4*01	11	100	83.3	98	95.8	95.6	100	ATGGAATCACAGACTCTGGTCTTCATATCCATACTGCTCTGGTTATATGGTGCTGATGGGAACATTGTAATGACCCAATTTCCCAAATCCATGTCCATGTCAGTAGGAGAGAGGGTCACCTTGAGCTGCAAGGCCAGTGAGAATGTGGGTACTTATGTATCCTGGTATCAACAGAAACCAGAGCAGTCTCCTAAACTGCTGATATACGGGGCATCCAACCGGTACACTGGGGTCCCCGATCGGTTCACAGGCAGTGGATCTGTAACAGATTTCACTCTGACCATCAGCAGTGTGCAGGCTGAAGACCTTGCAGATTATTACTGTGGACAGAGTTACAGCTATCCTCTCACGTTCGGTGCTGGGACCAAGCTGGAGCTGAAACGG	IGKV6-20*01	IGKJ5*01	4	100	100	94.1	100	97.2	100
58	N212	3	10	IgA	ATGAAATGCAGCTGGGTCATCTTCTTCCTGATGGCAGTGGTTATAGGGGTCAATTCAGAGGTTCAGCTGCAGCAGTCTGGGGCAGAGCTTGTGAGCCCAGGGGCCTCAGTCAAGTTGTCCTGCACAGCTTCTGGCTTCAACATTAAAGACAGCCTTATGCACTGGGTGAAGCAGAGGCCTGAACAGGGCCTGGAGTGGATTGGATGGATTGATCCTGAGGATGGTGAAACTAAATATGCCCCGAAGTTCCGGGACAAGGCCACTGTAACTTCAGACACATCCTCCAACACAGCCTACCTGCAGCTCAGCAGCCTGACATCTGAGGACACTGCCATCTATTACTGTACTCGCGATTACTACGCTGGTAGCCCCTATGCTATGGACTACTGGGGTCAAGGA…	IGHV14-1*01	IGHD1-1*01,IGHD1-1*02	IGHJ4*01	14	98.7	83.3	98	95.8	93.9	100	ATGGAATCACAGACTCTGGTCTTCATATCCATACTGCTCTGGTTATATGGTGCTGATGGGAACATTGTAATGACCCAATCTCCCAAATCCATGTCCATGTCAGTAGGAGAGAGGGTCACCTTGAGCTGCAAGGCCAGTGAGAATGTGGGTACTTATGTATCATGGTATCAACAGAAACCAGAGCAGTCTCCTAAAGTACTGATATACGGGGCATCCAACCGGTACACTGGGGTCCCCGATCGGTTCACAGGCAGTGGATCTGTAACAGATTTCACTCTGACCATCAGCAGTGTGCAGGCTGAAGACCTTGCAGATTATTACTGTGGACAGAGTTACAGCTATCCTCTCACGTTCGGTGCTGGGACCAAGCTGGAGCTGAAACGG	IGKV6-20*01	IGKJ5*01	6	100	100	98	100	97.2	100
59	N216	3	10	IgA	ATGAAATGCAGCTGGGTCATCTTCTTCCTGATGGCAGTGGTTATAGGGGTCAATTCAGAGGTTCAGCTGCAGCAGTCTGGGGCAGAGCTTGTGAGGCCAGGGGCCTCAGTCAAGTTGTCCTGCACAGCTTCTGGCTTCAACATTAAAGACAGCCTTATGCACTGGGTGAAGCAGAGGCCTGAACAGGGCCTGGAGTGGATTGGATGGATTGATCCTGAGGATGGTGAAACTAAATATGCCCCGAAGTTCCAGGACAAGGCCACTGTAACTGCAGACACATCCTCCAACACAGCCTACCTGCAGCTCAGCAGCCTGACATCTGAGGACACTGCCATCTATTACTGTACTCGCGATTACTACGATGGTAGCCCCTATGCTATGGACTTCTGGGGTCAAGGA…	IGHV14-1*01	IGHD1-1*01,IGHD1-1*02	IGHJ4*01	11	100	83.3	98	95.8	95.6	100	ATGGAATCACAGACTCTGGTCTTCATATCCATACTGCTCTGGTTATATGGTGCTGATGGGAACATTGTAATGACCCAATCTCCCAAATCCATGTCCATGTCAGTAGGAGAGAGGGTCACCTTGAGCTGCAAGGCCAGTGAGAATGTGGGTACTTATGTATCCTGGTATCAACAGAAACCAGAACAGTCTCCTAAACTGCTGATATACGGGGCATCCAACCGGTACACTGGGGTCCCCGATCGGTTCACAGGCAGTGGATCTGTAACAGATTTCACTCTGACCATCAGCAGTGTGCAGGCTGAAGACCTTGCAGATTATTACTGTGGACAGAGTTACAGCTATCCTCTCACGTTCGGTGCTGGGACCAAGCTGGAGCTGAAACGG	IGKV6-20*01	IGKJ5*01	4	100	100	100	100	96.3	100
60	N220	3	10	IgA	ATGAAATGCAGCTGGGTCATCTTCTTCCTGATGGCAGTGGTTATAGGGGTCAATTCAGAGGTTCAGCTGCAGCAGTCTGGGGCAGAGCTTGTGAGGCCAGGGGCCTCAGTCAAGTTGTCCTGCACAGCTTCTGGCTTCAACATTAAAGACAGCCTTATGCACTGGGTGAAGCAGAGGCCTGAACAGGGCCTGGAGTGGATTGGATGGATTGATCCTGAGGATGGTGAAACTAAATATGCCCCGAAGTTCCAGGACAAGGCCACTGTAACTGCAGACACATCCTCCAACACAGCCTACCTGCAGCTCAGCAGCCTGACATCTGAGGACACTGCCATCTATTACTGTACTCGCGATTACTACGATGGTAGCCCCTATGCTATGGACTACTGGGGTCAAGGA…	IGHV14-1*01	IGHD1-1*01,IGHD1-1*02	IGHJ4*01	11	100	83.3	98	95.8	95.6	100	ATGGAATCACAGACTCTGGTCTTCATATCCATACTGCTCTGGTTATATGGTGCTGATGGGAACATTGTAATGACCCAATCTCCCAAATCCATGTCCATGTCAGTAGGAGAGAGGGTCACCTTGAGCTGCAAGGCCAGTGAGAATGTGGGTACTTATGTATCCTGGTATCAACAGAAACCAGAGCAGTCTCCTAAACTGCTGATATACGGGGCATCCAACCGGTACACTGGGGTCCCCGATCGGTTCTCAGGCAGTGGATCTGTAACAGATTTCACTCTGACCATCAGCAGTGTGCAGGCTGAAGACCTTGCAGATTATTACTGTGGACAGAGTTACAGCTATCCTCTCACGTTCGGTGCTGGGACCAAGCTGGAGCTGAAACGG	IGKV6-20*01	IGKJ5*01	4	100	100	94.1	100	97.2	100
61	N221	3	10	IgA	ATGAAATGCAGCTGGGTCATCTTCTTCCTGATGGCAGTGGTTATAGGGGTCACTTCAGAGGTTCAGCTGCAGCAGTCTGGGGCAGAGCTTGTGAGGCCAGGGGCCTCAGTCAAGTTGTCCTGCACAGCTTCTGGCTTCAACATTAAAGACAGCCTTATGCACTGGGTGAAGCAGAGGCCTGAACAGGGCCTGGAGTGGATTGGATGGATTGATCCTGAGGATGGTGAAACTAAATATGCCCCGAAGTTCCGGGACAAGGCCACTGTAACTTCAGACACATCCTCCAATACAGCCTACCTGCAGCTCAGCAGCCTGACATCTGAGGACACTGCCATCTATTACTGTACTCGCGATTACTACGCTGGTAGTCCCTATGCTATGGACTACTGGGGTCAAGGA…	IGHV14-1*01	IGHD1-1*01,IGHD1-1*02	IGHJ4*01	14	100	83.3	98	95.8	93	100	ATGGAATCACAGACTCTGGTCTTCATATCCATACTGCTCTGGTTATATGGTGCTGATGGGAACATTGTAATGACCCAATCTCCCAAATCCATGTCCATGTCAGTAGGAGAGAGGGTCACCTTGAGCTGCAAGGCCAGTGAGAATGTGGGTACTTATGTATCATGGTATCAACAGAAACCAGAACAGTCTCCTAAAGTGCTGATATACGGGGCATCCAACCGGTACACTGGGGTCCCCGATCGGTTCACAGGCAGTGGATCTGTAACAGATTTCACTCTGACCATCAGCAGTGTGCAGGCTGAAGACCTTGCAGATTATTACTGTGGACAGAGTTACAGCTATCCTCTCACGTTCGGTGCTGGGACCAAGCTGGAGCTGAAACGG	IGKV6-20*01	IGKJ5*01	6	98.7	88.9	100	100	96.3	100
62	N223	3	10	IgA	ATGAAATGCAGCTGGGTCATCTTCTTCCTGATGGCAGTGGTTATAGGGGTCAATTCAGAGGTTCAGCTGCAGCAGTCTGGGGCAGAGCTTGTGAGGCCAGGGGCCTCAGTCAAGTTGTCCTGCACAGCTTCTGGCTTCAACATTAAAGACAGCCTTATGCACTGGGTGAAGCAGAGGCCTGAACAGGGCCTGGAGTGGATTGGATGGATTGCTCCTGAGGATGGTGAAACTAAATATGCCCCGAAGTTCCAGGACAAGGCCACTGTAACTGCAGACACATCCTCCAACACAGCCTACCTGCAGCTCAACAGCCTGACATCTGAGGACACTGCCATCTATTACTGTACTCGCGATTACTTCGGTGGTAGCCCCTATGCTATGGACTACTGGGGTCAAGGA…	IGHV14-1*01	IGHD1-1*01,IGHD1-1*02	IGHJ4*01	13	100	83.3	98	91.7	94.7	100	ATGGAATCACAGACTCTGGTCTTCATATCCATACTGCTCTGGTTATATGGTGCTGATGGGAACATTGTAATGACCCAATCTCCCAAATCCATGTCCATGTCAGTAGGAGAGAGGGTCACCTTGAGCTGCAAGGCCAATGACATTGTGGGTACTTATGTATCCTGGTATCAACAGAAACCAGAGCAGTCTCCTAAACTGCTGATATACGGGGCATCCAACCGGTACAGTGGGGTCCCCGATCGGTTCACAGGCAGTGGATCTGTAACAGATTTCACTCTGACCATCAGCAGTGTGCAGGCTGAAGACCTTGCAGATTATTACTGTGGACAGAGTTACAGCTATCCTCTCACGTTCGGTGCTGGGACCAAGCTGGAGCTGAAACGG	IGKV6-20*01	IGKJ5*01	7	100	100	98	100	97.2	100
63	N225	3	10	IgA	ATGAAATGCAGCTGGGTCATCTTCTTCCTGATGGCAGTGGTTATAGGGGTCAATTCAGAGGTTCAGCTGCAGCAGTCTGGGGCAGAGCTTGTGAGGCCAGGGGCCTCAGTCAAGTTGTCCTGCACAGCTTCTGGCTTCAACATTAAAGACAGCCTTATACACTGGGTGATGCGGAGGCCTGAACAGGGCCTGGAGTGGATTGGATGGATTGATCCTGAGGATGGTGAAACTAAATATGCCCCGAAGTTCCAGGACAAGGCCACTATAACTGCAGACACATCCTCCAACACAGCCTACCTGCAGCTCAGCAGCCTGACATCTGAGGACACTGCCATCTATTACTGTGCTAGAGATTACTACGATGGTAGTCCCTATGCTATGGACTACTGGGGTCAAGGA…	IGHV14-2*01	IGHD1-1*01,IGHD1-1*02	IGHJ4*01	14	98.7	83.3	90.2	100	96.5	100	ATGGAATCACAGACTCTGGTCTTCATATCCATACTGCTCTGGTTATATGGTGCTGATGGGAACATTGTAATGACCCAATCTCCCAAATCCATGTCCATGTCAGTAGGAGAGAGGGTCACCTTGAGCTGCAAGGCCAGTGAGAATGTGGGTACTTATGTATCCTGGTATCAACAGAAACCAGAACAGTCTCCTAAACTGCTGATATACGGGGCATCCAACCGGTACACTGGGGTCCCCGATCGCTTCACAGGCAGTGGATCTGTAACAGATTTCATTCTGACCATCAGCAGTGTGCAGGCTGAAGACCTTGCAGATTATTACTGTGGACAGAGTTACAGCTATCCGCTCACGTTCGGTGCTGGGACCAAGCTGGAGATGAAACGG	IGKV6-20*01	IGKJ5*01	4	100	100	96.1	100	97.2	100
64	N237	3	10	IgA	ATGAAATGCAGCTGGGTCATCTTCTTCCTGATGGCAGTGGTTATAGGGGTCAATTCAGAGGTTCAGCTGCAGCAGTCTGGGGCAGAGCTTGTGAGGCCAGGGGCCTCAGTCAAGTTGTCCTGCACAGCTTCTGGCTTCAACATTAAAGACAGCCTTATGCACTGGGTGAAGCAGAGGCCTGAACAGGGCCTGGAGTGGATTGGATGGATTGATCCTGAGGATGCTGAAACTAAATATGCCCCGAGGTTCCAGGACAAGGCCACTGTAATTGCAGACACATCCTCCAACACAGCCTACCTGCAGCTCAGCAGCCTGACATCTGAGGACACTGCCATCTATTACTGTACTCGCGATTACTACGATGGTAGCCCCTATACTATGGACTGCTGGGGTCAAGGA…	IGHV14-1*01	IGHD1-1*01,IGHD1-1*02	IGHJ4*01	14	98.7	91.7	94.1	83.3	94.7	100	ATGGAATCACAGACTCTGGTCTTCATATCCATACTGCTCTGGTTATATGGTGCTGATGGGAACATTGTAATGACCCAATCTCCCAAATCCATGTCCATGTCAGTAGGAGAGAGGGTCACCTTGAGCTGCAAGGCCAGTGAGAATGTGGGTACTTATGTATCCTGGTATCAACAAAAACCCGAGCAGTCTCCTAAACTGCTGATATACGGGGCATCCAACCGGTACACTGGGGTCCCCGATCGGTTCACAGGCAGTGGATCTGTAACAGATTTCACTCTGACCATCAGCAGTGTGCAGGCTGAAGACCTTGCAGATTATTACTGTGGACAGAGTTACAGCTATCCTCTCACGTTCGGTGCTGGGACCAAGCTGGAACTGAAACGG	IGKV6-20*01	IGKJ5*01	5	100	100	100	100	95.4	100
65	N239	3	10	IgA	ATGAAATGCAGCTGGGTCATCTTCTTCCTGATGGCAGTGGTTATAGGGGTCAATTCAGAGGTTCAGCTGCAGCAGTCTGGGGCAGAGCTTGTGAGGCCAGGGGCCTCAGTCAAGTTGTCCTGCACAGCTTCTGGCTTCAACATTAAAGACAGCCTTATGCACTGGGTGAAGCAGAGGCCTGAACAGGGCCTGGAGTGGATTGGATGGATTGATCCTGAGGATGGTGAAACTAAATATACCCCGAAGTTCCAGGACAAGGCCACTATAACTGCAGACACATCCTCCAACACAGCCTACCTGCAGCTCAGCAGCCTGACATCTGAGGACACTGCCGTCTATTACTGTTCTAGAGATTACTACGATGGTAGTCCCTATGCTATGGACTACTGGGGTCAAGGA…	IGHV14-2*01	IGHD1-1*01,IGHD1-1*02	IGHJ4*01	12	98.7	83.3	96.1	100	96.5	83.3	ATGGAATCACAGACTCTGGTCTTCATATCCATACTGCTCTGGTTATATGGTGCTGATGGGAACATTGTAATGACCCAATCTCCCAAATCCATGTCCATGTCAGTAGGAGAGAGGGTCACCTTGAGCTGCAAGGCCAGTGAGAATGTGGGTACTTATGTATCCTGGTATCAACAGAAACCAGAGCAGTCTCCTAAACTGCTGATATACGGGGCATCCAACCGGTACACTGGTGTCCCCAATCGCTTCACAGGCAGTGGATCTGTAACAGATTTCATTCTGACCATCAGCAGTGTGCAGGCTGAAGACCTTGCAGATTATTACTGTGGACAGAGTTACAGCTATCCACTCACGTTCGGTGCTGGGACCAAGCTGGAGCTGAAACGG	IGKV6-20*01	IGKJ5*01	5	98.7	94.4	100	100	98.1	100
66	N248	3	10	IgA	ATGAAATGCAGCTGGGTCATCTTCTTCCTGATGGCAGTGGTTATAGGGGTCAATTCAGAGGTTCAGCTGCAGCAGTCTGGGGCAGAGCTTGTGAGGCCAGGGGCCTCAGTCAAGTTGTCCTGCACAGCTTCTGGCTTCAACATTAAAGACAGCCTTATGCACTGGGTGAAGCAGAGGCCTGAACAGGGCCTGGAGTGGATTGGCTGGATTGATATTGAAGATGGTGAAACTAAATATGCCCCGAAGTTCCAGGACAAGGCCACTATAACTGCAGACACATCCTCCAACACAGCCTTCCTGCAGCTCAGCAGCCTGACATCTGAGGACACTGCCATCTATTACTGTGCTCGCGATTACTACGGTGGTAGCCCCTATGGTATGGACAACTGGGGTCAAGGA…	IGHV14-1*01	IGHD1-1*01,IGHD1-1*02	IGHJ4*01	16	100	83.3	96.1	83.3	95.6	66.7	ATGGAATCACAGACTCTGGTCTTCATATCCATACTGCTCTGGTTATATGGTGCTGATGGGAACATTGTAATGACCCAATCTCCCAGATCCATGTCCATGTCAGTAGGAGAGAGGGTCACCTTGAGCTGCAAGGCCAGTGAGATTGTGGGTACTTATGTATCCTGGTATCAACAGAAACCAGAGCAGTCTCCTAAACTGCTGATATACGGGGCATCCAACCGGTACACTGGGGTCCCCGATCGCTTCACAGGCAGTGGATCTGTAACAGATTTCACTCTGACCATCAGCAGTGTGCAGGCTGAAGACCTTGCAGATTATTACTGTGGACAGAGTTACAGCTATCCTCTCACGTTCGGTGCTG	IGKV6-20*01	IGKJ5*01	4	98.7	100	98	100	95.4	100
67	N703	3	10	IgA	ATGAAATGCAGCTGGGTCATCTTCTTCCTGATGGCAGTGGTTATAGGGGTCAATTCAGAGGTTCAGCTGCAGCAGTCTGGGGCAGAGCTTGTGAGGCCAGGGGCCTCAGTCAAGTTGTCCTGCACAGCTTCTGGCTTCAACATTAAAGACAGCCTTATGCACTGGGTGAAGCAGAGGCCTGAACAGGGCCTGGAGTGGATTGGATGGATTGATCCTGAGGATGGTGAAACTAAATATGCCCCGAAGTTCCAGGACAAGGCCACTATAACTGCAGACACATCCTCCAACACAGCCTACCTGCAGCTCAGCAGCCTGACATCTGAGGACACTGCCATCTATTACTGTGCTAGAGATTACTACGATGGTAGTCCCTATGCTATGGACTACTGGGGTCAAGGA…	IGHV14-1*01	IGHD1-1*01,IGHD1-1*02	IGHJ4*01	11	98.7	83.3	96.1	100	96.5	100	ATGGAATCACAGACTCTGGTCTTCATATCCATACTGCTCTGGTTATATGGTGCTGATGGGAACATTTTAATGACCCAATCTCCCAAATCCATGTCCATGTCAGTAGGAGAGAGGGTCACCTTGAGCTGCAAGGCCAGTGAGAATGTGGGTACTTATGTATCCTGGTATCAACAGAAACCAGAGCAGTCTCCTAAACTGTTGATATACGGGGCATCCAACCGGTACACTGGGGTCCCCGATCGCTTCACAGGCAGTGGATCTGTAACAGATTTCATTCTGACCATCAGCAGTGTGCGGGCTGAGGACCTTGCAGATTATTACTGTGGACAGAGTTACAGCTATCCGCTCACGTTCGGTGCTGGGACCAAGCTGGAGCTGAAACGG	IGKV6-20*01	IGKJ5*01	7	100	100	98	100	96.3	100
68	N706	3	10	IgA	ATGAAATGCAGCTGGGTCATCTTCTTCCTGATGGCAGTGGTTATAGGGGTCAATTCAGAGGTTCAGCTGCAGCAGTCTGGGGCAGAGCTTGTGAGGCCAGGGGCCTCAGTCAAGTTGTCCTGCACAGCTTCTGGCTTCAACATTAAAGACAGCCTTATGCACTGGGTGAAGCAGAGGCCTGAACAGGGCCTGGAGTGGATTGGATGGATTGATCCTGAGGATGGTGAAACTAAATATGCCCCGAAGTTCCAGGACAAGGCCACTGTAACTGCAGACACATCCTCCAACACAGCCTACCTGCAGCTCAGCAGCCTGACATCTGAGGACACTGCCATCTATTACTGTACTCGCGATTATTACGATGGTAGCCCCTATGCTATGGACTACTGGGGTCAAGGA…	IGHV14-1*01	IGHD1-1*02	IGHJ4*01	11	100	83.3	98	95.8	95.6	100	ATGGAATCACAGACTCTGGTCTTCATATCCATACTGCTCTGGTTATATGGTGCTGATGGGAACATTGTAATGACCCAATCTCCCAAATCCATGTCCATGTCAGTAGGAGAGAGGGTCACCTTGAGCTGCAAGGCCAGTGAGAATGTGGGTACTTATGTATCCTGGTATCAACAGAAACCAGAGCAGTCTCCTAAACTGCTGATCTACGGGGCATCCAACCGGTACACTGGGGTCCCCGATCGGTTCACAGGCAGTGGATCTGTAACAGATTTCACTCTGACCATCAACAGTGTGCAGGCTGAAGACCTTGCAGATTATTACTGTGGACAGAGTTACAGCTATCCTCTCACGTTCGGTGCTGGGACCAAGCTGGAGCTGAAACGG	IGKV6-20*01	IGKJ5*01	5	100	100	98	100	95.4	100
69	N710	3	10	IgA	ATGAAATGCAGCTGGGTCATCTTCTTCCTGATGGCAGTGGTTATAGGGGTCAATTCAGAGGTTCAGCTGCAGCAGTCTGGGGCAGAGCTTGTGAGGCCAGGGGCCTCAGTCAAGTTGTCCTGCACAGCTTCTGGCTTCAACATTAAAGACAGCCTTATGCACTGGGTGAAGCAGAGGCCTGAACAGGGCCTGGAGTGGATTGGATGGATTGATCCTGAGGATGGTGAAACTAAATATGCCCCGAAGTTCCAGGACAAGGCCACTGTAACTGCAGACACATCCTCCAACACAGCCTACCTGCAGCTCAGCAGCCTGACATCTGAGGACACTGCCATCTATTACTGTACTCGCGATTACTACGATGGTAGCCCCTATGCTATGGACTACTGGGGTCAAGGA…	IGHV14-1*01	IGHD1-1*01,IGHD1-1*02	IGHJ4*01	11	100	83.3	98	95.8	95.6	100	ATGGAATCACAGACTCTGGTCTTCATATCCATACTGCTCTGCTTATATGGTGCTGATGGGAACATTGTAATGACCCAATCTCCCAAATCCATGTCCATGTCAGTAGGAGAGAGGGTCACCTTGAGCTGCAAGGCCAGTGAGAATGTGGGTACTTATGTATCCTGGTATCAACAGAAACCAGAGCAGTCTCCTAAACTACTGATATACGGGGCATCCAACCGGTACACTGGGGTCCCCGATCGGTTCACAGGCAGTGGCTCTGTAACCGATTTCACTCTGACCATCAGCAGTGTGCAGGCTGAAGACCTTGCAGATTATTACTGTGGACAGAGTTACAGCTATCCTCTCACGTTCGGTGCTGGGACCAAGCTGGAGCTGAAACGG	IGKV6-20*01	IGKJ5*01	6	98.7	100	96.1	100	97.2	86.4
70	S213	3	10	IgG2	ATGAAATGCAGCTGGGTCATCTTCTTCCTGATGGCAGTGGTTATAGGGGTCAATTCAGAGGTTCAGCTGCAGCAGTCTGGGGCAGAGCTTGTGAGGCCAGGGACCTCAGTCAAGTTGTCCTGCACAGCTTCTGGCTTCAAAATTAAAGACAGCCTTATGCACTGGGTGAAGCAGAGGCCTGAACAGGGCCTGGAGTGGATTGGATGGATTGATCCTGAGGATGGTGAAACTAAATATGGCCCGAAGTTCCAGGACAAGGCCACTGTAACTGCAGACACTTCCTCCAACACAGCCTACCTGCACCTCAGCAGCCTGACATCTGAGGACACTGCCATCTATTACTGTACTCGCGATTATTACGGTGGTAGCCCCTATGCTATGGACTATTGGGGTCAAGGA…	IGHV14-1*01	IGHD1-1*01,IGHD1-1*02	IGHJ4*01	16	98.7	79.2	98	95.8	93	100	ATGGAATCACAGACTCTGGTCTTCATATCCATACTGCTCTGGTTATATGGTGCTGATGGGAACATTGTAATGACCCAATCTCCCAAATCCATGTCCATGTCAGTAGGAGAGAGGGTCACCTTGAGGTGCAAGGCCAGTGAGAATGTGGGTACTTATGTATCCTGGTATCAACAGAAACCAGAGCAGTCTCCTCAAGTGCTGATATACGGGGCATCCAACCGGTACACTGGGGTCCCCGATCGGTTCACAGGCAGTGGATCTGTAACAGATTTCACTCTGACCATCAGCAGTGTGCAGGCTGAAGACCTTGCAGATTATTACTGTGGCCAGAGTTATAGTTATCCTCTCACGTTCGGTGCTGGGACCAAGCTGGAGCTGAAACGG	IGKV6-20*01	IGKJ5*01	9	100	94.4	98	100	97.2	100
71	S221	3	10	IgG2	ATGAAATGCAGCTGGGTCATCTTCTTCCTGATGGCAGTGGTTATAGGGGTCAATTCAGAGGTTCAGCTGCAGCAGTCTGGGGCAGAGCTTGTGAGGCCAGGGGCCTCAGTCAAGTTGTCCTGCACAGCTTCTGGCTTCAACATTAAAGACAGCCTTATGCACTGGGTGAAGCAGAGGCCTGAACAGGGCCTGGAGTGGATTGGATGGATTGATCCTGAGGATGGTGAAACTAAATATGCCCCGAAGTTCCAGGGCAAGGCCACTGTAACTGCAGACACATCCTCCAACACAGCCTACCTGCAGCTCAGCAGCCTGACATCTGAGGACACTGCCATCTATTACTGTACTCGCGATTACTACGATGGTAGCCCCTATACTATGGACTACTGGGGTCAAGGA…	IGHV14-1*01	IGHD1-1*01,IGHD1-1*02	IGHJ4*01	10	100	83.3	98	95.8	96.5	100	ATGGAATCACAGACTCTGGTCTTCATATCCATACTGCTCTGGTTATATGGTGCTGATGGGAACATTGTAATGACCCAATCTCCCAAATCCATGTCCATGTCAGTAGGAGAGAGGGTCACCTTGAGCTGCAAGGCCAGTGAGAATGTGGGTATTTATGTATCCTGGTATCAACAGAAATCAGAGCAGTCTCCTAAACTGCTGATATACGGGGCATCCAACCGGTACACTGGGGTCCCCGATCGGTTCACAGGCAGTGGATCTGTAACAGATTTCACTCTGACCATCAGCAGTGTGCAGGCTGAAGACCTTGCAGATTATTACTGTGGACAGAGTTACAGCTATCCTCTCACGTTCGGTGCTGGGACCAAGCTGGAACTGAAACGG	IGKV6-20*01	IGKJ5*01	5	100	100	96.1	88.9	97.2	100
72	S306	3	10	IgG2	ATGAAATGCAGCTGGGTCATCTTCTTCCTGATGGCAGTGGTTATAGGGGTCAATTCAGAGGTTCAGCTGCAGCAGTCTGGGGCAGAGCTTGTGAGGCCAGGGGCCTCAGTCAAGTTGTCCTGCACAGCTTCTGGCTTCATCATTAAAGACAGCCTTATGCACTGGGTGAAGCAGAGGCCTGAACAGGGCCTGGAGTGGATTGGATGGATTGATCCTGAGGATGGTGAAACTAAATATGCCCCGAAGTTCCAGGACAAGGCCACTTTAACTGCAGACACATCCTCCAACACAGCCTACCTGCAGCTCAGCAGCCTGACATCTGAGGACACTGCCATCTTTTACTGTACTCGCGATTACTACGATGGTAGCCCCTATGCTTTGGACTACTGGGGTCAAGGA…	IGHV14-1*01	IGHD1-1*01,IGHD1-1*02	IGHJ4*01	13	100	79.2	98	95.8	94.7	100	ATGGAATCACAGACTCTGGTCTTCATATCCATACTGCTCTGGTTATATGGTGCTGACGGGAACATTGTAATGACCCAATCTCCCAAATCCATGTCCATGTCAGTAGGAGAGAGGGTCACCTTGAGCTGCAAGGCCAGTGAGAATGTGGGTACTTATTTATCCTGGTATCAACAGAAACCAGAGCAGTCTCCTAAAGTGCTGATATACGGGGCTTCCAACCGGTACACTGGGGTCCCCGATCGGTTCACAGGCAGTGGATCTGTAACAGATTTCACTCTGACCATCAGCAGTGTGCAGGCTGAAGACCTTGCAGATTATTACTGTGGACAGAGTTACAGCTATCCTCTCACGTTCGGTGCTGGGACCAAGCTGGAGCTGAAACGG	IGKV6-20*01	IGKJ5*01	6	100	88.9	98	100	97.2	100
73	S316	3	10	IgG2	ATGAAATGCAGCTGGGTCATCTTCTTCCTGATGGCAGTGGTTATAGGGGTCAATTCAGAGGTTCAGCTGCAGCAGTCTGGGGCAGAGCTTGTGAGGCCAGGGGCCTCAGTCAAGTTGTCCTGCACAGCTTCTGGCTTCAACATTAAAGACAGCCTTATGCACTGGGTGAAGCAGAGGCCTGAACAGGGCCTGGAGTGGATTGGATGGATTGATCCTGAGGATGGTGAAACTAAATATGTCCCGAAGTTCCAGGGCAAGACCACTGTAACTGCAGACACATCCTCCAACACAGCCTACCTGCAGCTCAGCAGCCTGACATCTGAGGACACTGCCATCTATTACTGTACTCGCGATTACTACGATGGTAGCCCCTATACTATGGACTACTGGGGTCAAGGA…	IGHV14-1*01	IGHD1-1*01,IGHD1-1*02	IGHJ4*01	12	100	83.3	98	95.8	94.7	100	ATGGAATCACAGACTCTGGTCTTCATATCCATACTGCTCTGGTTATATGGTGCTGATGGGAACATTGTAATGACCCAATCTCCCAAATCCATGTCCATGTCAGTAGGAGAGAGGGTCACCTTGAGCTGCAAGGCCAGTGACAATGTGGGTATTTATGTATCCTGGTATCAACAGAAATCAGAGCAGTCTCCTAAACTGCTGATATACGGGGCATCCAACCGGTACACTGGGGTCCCCGATCGGTTCACAGGCAGTGGATCTGTAACAGATTTCACTCTGACCATCAGCAGTGTGCAGGCTGAAGACCTTGCAGATTATTACTGTGGACAGAGTTACAGCTATCCTCTCACGTTCGGTGCTGGGACCAAGCTGGAACTGAAACGG	IGKV6-20*01	IGKJ5*01	6	100	100	94.1	100	97.2	100
74	S503	3	10	IgA	ATGAAATGCAGCTGGGTCATCTTCTTCCTGATGGCAGTGGTTATAGGGGTCACTTCAGAGGTTCAGCTGCAGCAGTCTGGGGCAGAGCTTGTGAGGCCAGGGGCCTCAGTCAAGTTGTCCTGCACAGCTTCTGGCTTCAACATTAAAGACAGCCTTATGCACTGGGTGAAGCAGAGGCCTGAACAGGGCCTGGAGTGGATTGGATGGATTGATCCTGAGGATGGTGAAACTAAATATGCCCCGAAGTTCCGGGACAAGGCCACTGTAACTTCAGACACATCCTCCAATACAGCCTACCTGCAGCTCAGCAGCCTGACATCTGAGGACACTGCCATCTATTACTGTACTCGCGATTACTACGCTGGTAGTCCCTATGCTATGGACTACTGGGGTCAAGGA…	IGHV14-1*01	IGHD1-1*01,IGHD1-1*02	IGHJ4*01	14	100	83.3	98	95.8	93	100	ATGGAATCACAGACTCTGGTCTTCATATCCATACTGCTCTGGTTATATGGTGCTGATGGGAACATTGTAATGACCCAATCTCCCAAATCCATGTCCATGTCAGTAGGAGAGAGGGTCACCTTGAGCTGCAAGGCCAGTGAGAATGTGGGTACTTATGTATCATGGTATCAACAGAAACCAGAACAGTCTCCTAAAGTGCTGATATACGGGGCATCCAACCGGTACACTGGGGTCCCCGATCGGTTCACAGGCAGTGGATCTGTAACAGATTTCACTCTGACCATCAGCAGTGTGCAGGCTGAAGACCTTGCAGATTATTACTGTGGACAGAGTTACAGCTATCCTCTCACGTTCGGTGCTGGGACCAAGCTGGAGCTGAAACGG	IGKV6-20*01	IGKJ5*01	6	100	100	94.1	100	97.2	100
75	S505	3	10	IgA	ATGAAATGCAGCTGGGTCATCTTCTTCCTGATGGCAGTGGTTATAGGGGTCAATTCAGAGGTTCAGCTGCAGCAGTCTGGGGCAGAGCTTGTGAGGCCAGGGGCCTCAGTCAAGTTGTCCTGCACAGCTTCTGGCTTCAACATTAAAGACAGCCTTATGCACTGGGTGAAGCAGAGGCCTGAACAGGGCCTGGAGTGGATTGGATGGATTGATCCTGAGGATGGTGAAACTAAATATGCCCCGAAGTTCCGGGACAAGGCCACTGTAACTTCAGACACATCCTCCAACACAGCCTACCTGCAGCTCAGCAGCCTGACATCTGAGGACACTGCCATCTATTACTGTACTCGCGATTACTACGCTGGTAGCCCCTATGCTATGGACTACTGGGGTCAAGGA…	IGHV14-1*01	IGHD1-1*01,IGHD1-1*02	IGHJ4*01	13	100	83.3	98	95.8	93.9	100	ATGGAATCACAGACTCTGGTCTTCATATCCATACTGCTCTGGTTATATGGTGCTGATGGGAACATTGTAATGACCCAATCTCCCAAATCCATGTCCATGTCAGTAGGAGAGAGGGTCACCTTGAGCTGCAAGGCCAGTGAGAATGTGGGTACTTATGTATCATGGTATCAACAGAAACCAGAGCAGTCTCCTAAAGTACTGATATACGGGGCATCCAACCGGTACACTGGGGTCCCCGATCGGTTCACAGGCAGTGGATCTGTAACAGATTTCACTCTGACCATCAGCAGTGTGCAGGCTGAAGACCTTGCAGATTATTACTGTGGACAGAGTTACAGCTATCCTCTCACGTTCGGTGCTGGGACCAAGCTGGAGCTGAAACGG	IGKV6-20*01	IGKJ5*01	6	100	100	98	100	98.1	100
76	S506	3	10	IgA	ATGAAATGCAGCTGGGTCATCTTCTTCCTGATGGCAGTGGTTATAGGGGTCAATTCAGAGGTTCAGCTGCAGCAGTCTGGGGCAGAGCTTGTGAGGCCAGGGGCCTCAGTCAAGTTGTCCTGCACAGCTTCTGGCTTCAACATTCAAGACAGCCTTATGCACTGGGTGAAGCAGAGGCCTGAACGGGGCCTGGAGTGGATTGGATGGATTGATCCTGAGGATGGTGAAACTAAATATGCCCCGAAGTTCCAGGACAAGGCCACTATAACTGCAGACACATCCTCCAACACAGCCTACCTGCACCTCAGCAGCCTGACATCTGAGGACACTGCCATCTATTACTGTGCTCGCGATTACTACGATGGTAGCCCCTATGCTATGGACTACTGGGGTCAAGGA…	IGHV14-1*01	IGHD1-1*01,IGHD1-1*02	IGHJ4*01	14	100	79.2	96.1	95.8	95.6	66.7	ATGGAATCACAGACTCTGGTCTTCATATCCATACTGCTCTGGTTATATGGTGCTGATGGGAACATTGTAATGACCCAATCTCCCAAATCCATGTCCATGTCAGTAGGAGAGAGGGTCACCTTGAGCTGCAAGGCCAGTGAGAATGTGGGTACTTATGTATCCTGGTATCAACAGAAACCAGAACAGTCTCCTAAACTGCTGATATACGGGGCATCCAACCGGTACACTGGGGTCCCCGATCGCTTCACAGGCAGTGGATCTGTAACAGATTTCACTCTGACCATCAGCAGTGTGCAGGCTGAAGACCTTGCAGATTATTACTGTGGACAGAGTTACAGCTATCCTCTCACGTTCGGTGCTGGGACCAAGCTGGAGCTGAAACGG	IGKV6-20*01	IGKJ5*01	3	100	100	100	100	96.3	100
77	S510	3	10	IgA	ATGAAATGCAGCTGGGTCATCTTCTTCCTGATGGCAGTGGTTATAGGGGTCAATTCAGAGGTTCAGCTGCAGCAGTCTGGGGCAGAGCTTGTGAGGCCAGGGGCCTCAGTCAAGTTGTCCTGCACAGCTTCTGGCTTCAACATTAAAGACAGCCTTATGCACTGGGTGAGGCAGAGGCCTGAACAGGGCCTGGAGTGGATTGGATGGATTGATCCTGAGGATGGTGAAACTAAATATGCCCCGAAGTTCCAGGACAGGGCCACTGTAACTGCAGACACATCCTCCAACACAGCCTACCTGCAACTCAGCAGCCTGTCATCTGAGGACACTGCCATCTATTACTGTACTCGCGATTATTACGATGGTAGCCCCTATGCTATGGACTACTGGGGTCAAGGC…	IGHV14-1*01	IGHD1-1*02	IGHJ4*01	15	100	83.3	96.1	95.8	93	100	ATGGAATCACAGACTCTGGTCTTCATATCCATACTGCTCTGGTTATATGGTGCTGATGGGAACATTGTAATGACCCAATCTCCCAAATCCATGTCCATGTCAGTAGGAGAGAGGGTCACCTTGAGCTGCAAGGCCAGTGAGAATGTGGGTACTTATGTATCCTGGTATCAACAGAAACCAGAGCAGTCTCCTAAACTGCTGATATACGGGGCATCCAACCGGTACACTGGGGTCCCCGATCGGTTCACAGGCAGTGGATCTGTAACAGCTTTCACTCTGACCATCAGCAGTGTGCAGGCTGAAGACCTTGCAGATTATTACTGTGGACAGAGTTACAGCTATCCTCTCACGTTCGGTGCTGGGACCAAGCTGGAGCTGAAACGG	IGKV6-20*01	IGKJ5*01	4	100	94.4	98	100	95.4	100
78	S514	3	10	IgA	ATGAAATGCAGCTGGGTCATCTTCTTCCTGATGGCAGTGGTTATAGGGGTCAATTCAGAGATTCAGCTGCAGCAGTCTGGGGCAGAGCTTGTGAGGCCAGGGGCCTCAGTCAAGTTGTCCTGCACAGCTTCTGGCTTCAACATTAAAGACAGCCTTATGCACTGGGTGAAGCAGAGGCCTGAACAGGGCCTGGAGTGGATTGGATGGATTGATCCTGAGGATGGTGAAACTAAATATGTCACGAAGGTCCAGGGCAAGGCCACTGTAACTGCAGACACATCCTCCAACACAGCCTACCTGCAGCTCAGCAGCCTGACATCTGAGGACACTGCCATCTATTACTGTACTCGCGATTACTACGATGGTAGCCCCTATACTATGGACTACTGGGGTCAAGGA…	IGHV14-1*01	IGHD1-1*01,IGHD1-1*02	IGHJ4*01	14	98.7	83.3	98	95.8	93.9	100	ATGGAATCACAGACTCTGGTCTTCATATCCATACTGCTCTGGTTATATGGTGCTGATGGGAACATTGTAATGACCCAATCTCCCAAATCCATGTCCATGTCAGTAGGAGAGAGGGTCACCTTGAGCTGCAAGGCCAGTGAGAATGTGGGTATTTATGTATCCTGGTATCAACAGAAATCAGAGCAGTCTCCTAAACTGCTGATATACGGGGCATCCAACCGGTATAATGGGGTCCCCGATCGGTTCACAGGCAGTGGATCTGTAACAGATTTCACTCTGACCATCAGCAGTGTGCAGGCTGAAGACCTTGCAGATTATTACTGTGGACAGAGTTACAGCTATCCTCTCACGTTCGGTGCTGGGACCAAGCTGGAATTGAAACGG	IGKV6-20*01	IGKJ5*01	7	100	100	96.1	100	97.2	100
79	S520	3	10	IgA	ATGAAATGCAGCTGGGTCATCTTCTTCCTGATGGCAGTGGTTATAGGGGTCAATTCAGAGGTTCAGCTGCAGCAGTCTGGGGCAGAGCTTGTGAGGCCAGGGGCCTCAGTCAAGTTGTCCTGCACAGCTTCTGGCTTCAACATTAAAGACAGCCTTATGCACTGGGTGAAGCAGAGGCCTGAACAGGGCCTGGAGTGGATTGGATGGATTGATCCTGAGGATGGTGAAACTAAATATGCCCCGAAGTTCCGGGACAAGGCCACTGTAACTTCAGACACATCCTCCAACACAGCCTACCTGCAGCTCAGCAGCCTGACATCTGAGGACACTGCCATCTATTACTGTTCTCGCGATTACTACGCTGGTAGCCCCTATAGTATGGACTACTGGGGTCAAGGA…	IGHV14-1*01	IGHD1-1*01,IGHD1-1*02	IGHJ4*01	14	100	83.3	98	95.8	93.9	66.7	ATGGAATCACAGACTCTGGTCTTCATATCCATACTGCTCTGGTTATATGGTGCTGATGGGAACATTGTAATGACCCAATCTCCCAAATCCATGTCCATGTCAGTAGGAGAGAGGGTCACCTTGAGCTGCAAGGCCAGTGAGAATGTGGGTACTTATGTATCATGGTATCAACAGAAACCAGAGCAGTCTCCTAAAGTGCTGATATACGGGGCATCCAACCGGTACACTGGGGTCCCCGATCGGTTCACAGGCAGTGGATCTGTAACAGATTTCACTCTGACCATCAGCAGTGTGCAGGCTGAAGACCTTGCAGATTATTACTGTGGACAGAGTTACAGCTATCCTCTCACGTTCGGTGCTGGGACCAAGCTGGAGCTGAAACGG	IGKV6-20*01	IGKJ5*01	5	100	100	100	100	97.2	100
80	S523	3	10	IgA	ATGAAATGCAGCTGGGTCATCTTCTTCCTGATGGCAGTGGTTATAGGGGTCAATTCAGAGGTTCAGCTGCAGCAGTCTGGGGCAGAGCTTGTGAGGCCAGGGGCCTCAGTCAAGTTGTCCTGCACAGCTTCTGGCTTCAACATTAAAGACAGCCTTATGCACTGGGTGAAGCAGAGGCCTGAACAGGGCCTGGAGTGGATTGGATGGATTGATCCTGAGGATGGTGAAACTAAATATGCCCCGAAGTTCCAGGACAAGGCCACTGTAACTGCAGACACATCCTCCAACACAGCCTACCTGCAGCTCAGCAGCCTGACATCTGAGGACACTGCCATCTATTACTGTACTCGCGATTATTACGATGGTAGCCCCTATGCTATGGACTACTGGGGTCAAGGA…	IGHV14-1*01	IGHD1-1*02	IGHJ4*01	11	100	83.3	98	95.8	95.6	100	ATGGAATCACAGACTCTGGTCTTCATATCCATACTGCTCTGGTTATATGGTGCTGATGGGAACATTGTAATGACCCAATCTCCCAAATCCATGTCCATGTCAGTAGGAGAGAGGGTCACCTTGAGCTGCAAGGCCAGTGAGAATGTGGGTACTTATGTATCCTGGTATCAACAGAAACCAGAGCAGTCTCCTAAACTGCTGATATACGGGGCATCCAACCGGTACACTGGGGTCCCCGATCGGTTCACAGGCAGTGGATCTGTAACAGATTTCACTCTGACCATCAGCAGTGTGCAGGCTGAAGACCTTGCAGATTATTACTGTGGACAGAGTTACAGCTATCCTCTCACGTTCGGTGCTGGGACCAAGCTGGAGCTGAAACGG	IGKV6-20*01	IGKJ5*01	3	98.7	94.4	98	100	96.3	100
81	S526	3	10	IgA	ATGAAATGCAGCTGGGTCATCTTCTTCCTGATGGCAGTGGTTATAGGGGTCAATTCAGAGGTTCAGCTGCAGCAGTCTGGGGCAGAGCTTGTGAGGCCAGGGGCCTCAGTCAAGTTGTCCTGCACAGCTTCTGGCTTCAACATTAAAGACAGCCTTATGCACTGGGTGAAGCAGAGGCCTGAACAGGGCCTGGAGTGGATTGGATGGATTGATCCTGAGGATGGTGAAACTAAATATGCCCCGAAGTTCCAGGACAAGGCCACTGTAACTGCAGACACATCTTCCAACACAGCCTACCTGCAGCTCAGCAGCCTGACATCTGAGGACACTGCCATCTATTACTGTACTCGCGATTACTACGATGGTAGTCCCTATACTATGGACTACTGGGGTCAAGGA…	IGHV14-1*01	IGHD1-1*01,IGHD1-1*02	IGHJ4*01	12	100	83.3	98	95.8	94.7	100	ATGGAATCACAGACTCTGGTCCTCATATCCATGCTGCTCTGGTTATATGGTGCTGATGGGAACACTGTAATGACCCAATCTCCCAAATCCATGTCCATGTCAGTAGGAGAGAGGGTCACCTTGAGCTGCAAGGCCAGTGAGAATGTGGGTAGTTATGTATCCTGGTATCAACAGAAACCAGAACAGTCTCCTAAACTGCTGATATACGGGGCATCCAACCGGTACACTGGGGTCCCCGATCGGTTCACAGGCAGTGGATCTGTAACAGATTTCACTCTGACCATCAGCAGTGTGCAGGCTGAAGACCTTGGAGATTATTACTGTGGACAGAGTTACAGCTATCCTCTCACGTTCGGTGCTGGGACCAAGCTGGAGCTGAAACGG	IGKV6-20*01	IGKJ5*01	7	100	100	100	100	96.3	100
82	S527	3	10	IgA	ATGAAATGCAGCTGGGTCATCTTCTTCCTGATGGCAGTGGTTATAGGGGTCAATTCAGAGGTTCAACTGCAGCAGTCTGGGGCAGAGCTTGTGAGGCCAGGGGCCTCAGTCAAGTTGTCCTGCACAGCTTCTGGCTTCAACATTAAAGACAGCCTTATGCACTGGGTGAAACAGAGGCCTGAACAGGGCCTGGAGTGGATTGGATGGATTGATCCTGAGGATGGTGAAACTAAATATGCCCCGAAGTTCCAGCACAAGGCCACTGTAACTGCAGACACATCCTCCAACACAGCCTACCTGCAGCTCAGCAGCCTGACATCTGAGGACACTGCCATCTATTACTGTACTCGCGATTACTACGATGGTGACCCCTATGCTATGGACTACTGGGGTCAAGGA…	IGHV14-1*01	IGHD2-13*01	IGHJ4*01	14	98.7	83.3	96.1	95.8	94.7	100	ATGGAATCACAGACTCTGGTCTTCATATCCATACTGCTCTGGTTATATGGTGCTGATGGGAACATTGTAATGACCCAATCTCCCAAATCCATGTCCATGTCAGTAGGAGAGAGGGTCACCTTGAGCTGCAAGGCCAGTGAGAATGTGGGTACTTATGTATCCTGGTATCAACAGAAACCAGAGCAGTCTCCTAAACTGCTGATATACGGGGCATCCAACCGGTACACTGGGGTCCCCGATCGGTTCTCAGGCAGTGGATCTGTAACAGATTTCACTCTGACCATCAGCAGTGTGCAGGCTGAAGACCTTGCAGATTATTACTGTGGACAGAGTTACAGCTATCCTCTCACGTTCGGTGCTGGGACCAAGCTGGAGCTGAAACGG	IGKV6-20*01	IGKJ5*01	4	97.4	94.4	100	100	97.2	100
83	S537	3	10	IgA	ATGAAATGCAGCTGGGTCATCTTCTTCCTGATGGCAGTGGTTATAGGGGTCAATTCAGAGGTTCAGCTGCAGCAGTCTGGGGCAGAGCTTGTGAGGCCAGGGGCCTCAGTCAAGTTGTCCTGCACAGCTTCTGGCTTCAACATTAAAGACAGCCTTATGCACTGGGTGAAGCAGAGGCCTGAACAGGGCCTGGAGTGGATTGGCTGGATTGATATTGAAGATGGTGAAACTAAATGTGCCCCGAAGTTCCAGGACAGGGCCACTATAACTGCAGACACATCCTCCAACACAGCCTACCTGCAGCTCAGCAGCCTGACATCTGAGGACACTGCCATCTATTACTGTGCTCGCGATTACTACGGTGGTAGCCCCTATGCTATGGACAACTGGGGTCAAGGA…	IGHV14-1*01	IGHD1-1*01,IGHD1-1*02	IGHJ4*01	17	100	83.3	96.1	83.3	94.7	66.7	ATGGAATCACAGACTCTGGTCTTCATATCCATACTGCTCTGGTTATATGGTGCTGATGGGAACATTGTAATGACCCAATCTCCCAGATCCATGTCCATGTCAGTAGGAGAGAGGGTCACCTTGAACTGCAAGGCCAGTGAGATTGTGGGTACTTATGTATCCTGGTATCAACAGAAACCAGAGCAGTCTCCTAAACTGCTGATATACGGGGCATCCAACCGGTACACTGGGGTCCCCGATCGCTTCACAGGCAGTGGATCTGTAACAGATTTCACTCTGACCATCAGCACTGTGCAGGCTGAAGACCTTGCAGATTATTACTGTGGACAGAGTTACAGCTATCCTCTCACGTTCGGTGCTGGGACCAAGCTGGAGCTGAAACGG	IGKV6-20*01	IGKJ5*01	6	100	100	100	100	96.3	100
84	S538	3	10	IgA	ATGAAATGCAGCTGGGTCATCTTCTTCCTGATGGCAGTGGTTATAGGGGTCAATTCAGAGGTTCAGCTGCAGCAGTCTGGGGCAGAGCTTGTGAGGCCAGGGGCCTCAGTCAAGTTGTCCTGCACAGCTTCTGGCTTCAACATTAAAGACAGCCTTATGCACTGGGTGAGGCAGAGGCCTGAACAGGGCCTGGAGTGGATTGGATGGATTGATCCTGAGGATGGTGAAACTAAATATGCCCCGAAGTTCCAGGACAGGGCCACTGTAACTGCAGACACATCCTCCAACACAGCCTACCTGCAACTCAGCAGCCTGTCATCTGAGGACACTGCCATCTATTACTGTACTCGCGATTATTACGATGGTAGCCCCTATGCTATGGACTACTGGGGTCAAGGC…	IGHV14-1*01	IGHD1-1*02	IGHJ4*01	15	100	83.3	96.1	95.8	93	100	ATGGAATCACAGACTCTGGTCTTCATATCCATACTGCTCTGGTTATATGGTGCTGATGGGAACATTGTAATGACCCAATCTCCCAAATCCATGTCCATGTCAGTAGGAGAGAGGGTCACCTTGAGCTGCAAGGCCAGTGAGAATGTGGGTACTTATGTATCCTGGTATCAACAGAAACCAGAGCAGTCTCCTAAACTGCTGATATACGGGGCATCCAACCGGTACACTGGGGTCCCCGATCGGTTCACAGGCAGTGGATCTGTAACAGCTTTCACTCTGACCATCAGCAGTGTGCAGGCTGAAGACCTTGCAGATTATTACTGTGGACAGAGTTACAGCTATCCTCTCACGTTCGGTGCTGGGACCAAGCTGGAGCTGAAACGG	IGKV6-20*01	IGKJ5*01	4	100	100	96.1	100	97.2	90.9
85	S539	3	10	IgA	ATGAAATGCAGCTGGGTCATCTTCTTCCTGATGGCAGTGGTTATAGGGGTCAATTCAGAGGTTCAGCTGCAGCAGTCTGGGGCAGAGCTTGTGAGGCCAGGGGCCTCAGTCAAGTTGTCCTGCACAGCTTCTGGCTTCAACATTAAAGACAGCCTTATGTACTGGGTGAAACAGAGGCCTGAACAGGGCCTGGAGTGGATTGGATGGATTGATCCTGAGGATGGTGAAACTAAATATGCCCCGAAGTTCCAGGACAAGGCCACTATAACTGCAGACACATCCTCCAACACAGCCCACCTGCAGCTCAGCAGCCTGACATCTGAGGACACTGCCATCTATTACTGTGCTCGCGATTACTACGATGGTAGCCCCTATACTATGGACTACTGGGGTCAAGGA…	IGHV14-1*01	IGHD1-1*01,IGHD1-1*02	IGHJ4*01	14	100	83.3	94.1	95.8	95.6	66.7	ATGGAATCACAGACTCTGGTCTTCATATCCATACTGCTCTGGTTATATGGTGCTGATGGGAACATTGTAATGACCCAATCTCCCAAATCCATGTCCATGTCAGTAGGAGAGAGGGTCACCTTGAGCTGCAAGGCCAGTGAGAATGTGGGTACTTATGTATCCTGGTATCAACAGAAACCAGACCAGTCTCCTCAACTGCTGATATACGGGGCATCCAACCGGTACACTGGGGTCCCCGATCGCTTCACAGGCAGTGGATCTGTAATAGATTTCACTCTGACCATCAGCAGTGTGCAGGCTGAAGACCTTGCAGATTATTACTGTGGACAGACTTACACCTATCCTCTCACGTTCGGTGCTGGGACCAAGCTGGAGCTGAAACGG	IGKV6-20*01	IGKJ5*01	7	97.4	100	96.1	100	97.2	100
86	S541	3	10	IgA	ATGAAATGCAGCTGGGTCATCTTCTTCCTGATGGCAGTGGTTATAGGGGTCAATTCAGAGGTTCAGCTGCAGCAGTCTGGGGCAGAGCTTGTGAGGCCAGGGGCCTCAGTCAAGTTGTCCTGCACAGCTTCTGGCTTCAACATTAAAGACAGCCTTATGCACTGGGTGAAGCAGAGGCCTGAACAGGGCCTGGAGTGGATTGGATGGATTGATCCTGAGGATGGTGAAACTAAATATGTCCCGAAGTTCCAGGACAAGGCCACTGTAACTGCAGACACATCCTCCAACACAGCCTACCTGCAGGTCAGCAGCCTGACATCTGAGGACACTGCCATCTATTACTGTACTCGCGATTACTACGATGGTAGCCCCTATGCTATGGACTACTGGGGTCAAGGA…	IGHV14-1*01	IGHD1-1*01,IGHD1-1*02	IGHJ4*01	13	100	83.3	98	95.8	93.9	100	ATGGAATCACAGACTCTGGTCTTCATATCCATACTGCTCTGGTTATATGGTGCTGATGGGAACATTGTAATGACCCAATCTCCCAAATCCATTTCCATGTCAATAGGAGAGAGGGTCACCTTGAGCTGCAAGGCCAGTGAGAATGTGGGTACTTATGTATCCTGGTATCAACAGAAAGTAGAGCAGTCTCCTAAACTGCTGATATACGGGGCATCCAACCGGTACACTGGGGTCCCCGATCGGTTCACAGGCAGTGGATCTGTAACAGATTTCACTCTGACCATCAGCAGTGTGCAGGCTGAAGACCTTGCAGATTATTACTGTGGACAGAGTTACAGCTATCCTCTCACGTTCGGTGCTGGGACCAAGCTGGAGCTTAAACGG	IGKV6-20*01	IGKJ5*01	7	100	100	94.1	100	97.2	100
87	S543	3	10	IgA	ATGAAATGCAGCTGGGTCATCTTCTTCCTGATGGCAGTGGTTATAGGGGTCACTTCAGAGGTTCAGCTGCAGCAGTCTGGGGCAGAGCTTGTGAGGCCAGGGGCCTCAGTCAAGTTGTCCTGCACAGCTTCTGGCTTCAACATTAAAGACAGCCTTATGCACTGGGTGAAGCAGAGGCCTGAACAGGGCCTGGAGTGGATTGGATGGATTGATCCTGAGGATGGTGAAACTAAATATGCCCCGAAGTTCCGGGACAAGGCCACTGTAACTTCAGACACATCCTCCAATACAGCCTACCTGCAGCTCAGCAGCCTGACATCTGAGGACACTGCCATCTATTACTGTACTCGCGATTACTACGCTGGTAGTCCCTATGCTATGGACTACTGGGGTCAAGGA…	IGHV14-1*01	IGHD1-1*01,IGHD1-1*02	IGHJ4*01	14	100	83.3	98	95.8	93	100	ATGGAATCACAGACTCTGGTCTTCATATCCATACTGCTCTGGTTATATGGTGCTGATGGGAACATTGTAATGACCCAATCTCCCAAATCCATGTCCATGTCAGTAGGAGAGAGGGTCACCTTGAGCTGCAAGGCCAGTGAGAATGTGGGTACTTATGTATCATGGTATCAACAGAAACCAGAACAGTCTCCTAAAGTGCTGATATACGGGGCATCCAACCGGTACACTGGGGTCCCCGATCGGTTCACAGGCAGTGGATCTGTAACAGATTTCACTCTGACCATCAGCAGTGTGCAGGCTGAAGACCTTGCAGATTATTACTGTGGACAGAGTTACAGCTATCCTCTCACGTTCGGTGCTGGGACCAAGCTGGAGCTGAAACGG	IGKV6-20*01	IGKJ5*01	6	100	100	100	100	97.2	100
88	S547	3	10	IgA	ATGAAATGCAGCTGGGTCATCTTCTTCCTGATGGCAGTGGTTATAGGGGTCAATTCAGAGGTTCAGCTGCAGCAGTCTGGGGCAGAGCTTGTGAGGCCAGGGGCCTCAGTCAAGTTGTCCTGCACAGCTTCTGGCTTCAACATTAAAGACAGCCTTATGCACTGGGTGAAGCAGAGGCCTGAACAGGGCCTGGAGTGGATTGGATGGATTGATCCTGAGGATGGTGAAACTAAATATGCCCCGAAGTTCCAGGACAAGGCCACTGTAACTGCAGACACATCCTCCAACTCAGCCTACCTGCAGCTCAGCAGCCTGACATCTGAGGACACTGCCATCTATTACTGTACTCGCGATTACTACGATGGTAGCCCCTATGCTATGGACTACTGGGGTCAAGGA…	IGHV14-1*01	IGHD1-1*01,IGHD1-1*02	IGHJ4*01	12	100	83.3	98	95.8	94.7	100	ATGGAATCACAGACTCTGGTCTTCATATCCATACTGCTCTGGTTATATGGTGCTGATGGGAACATTGTAATGACCCAATCTCCCAAATCCATGTCCATGTCAGTAGGAGAGAGGGTCACCTTGAGCTGCAAGGCCAGTGAGAATGTGGGTACTTATGTATCCTGGTATCAACAGAAACCAGAGCAGTCTCCTAAACTGCTGATATACGGGGCATCCAACCGGTACACTGGGGTCCCCGATCGGTTCACAGGCAGTGGATCTGTAACAGATTTCACTCTGACCATCAGCAGTGTGCAGGCTGAAGACCTTGCAGATTATTACTGTGGACAGAGTTACAGCTATCCTCTCACGTTCGGTGCTGGGACCAAGCTGGAGCTGAAACGG	IGKV6-20*01	IGKJ5*01	3	97.4	94.4	100	100	97.2	100
89	S548	3	10	IgA	ATGAAATGCAGCTGGGTCATCTTCTTCCTGATGGCAGTGGTTATAGGGGTCAATTCAGAGGTTCAGCTGCAGCAGTCTGGGGCAGAGCTTGTGAGGCCAGGGGCCTCAGTCAAGTTGTCCTGCACAGCTTCTGGCTTCAACATTAAAGACAGCCTTATGCACTGGGTGAAGCAGAGGCCTGAACAGGGCCTGGAGTGGATTGGCTGGATTGATATTGAAGATGGTGAAACTAAATGTGCCCCGAAGTTCCAGGACAGGGCCACTATAACTGCAGACACATCCTCCAACACAGCCTACCTGCAGCTCAGCAGCCTGACATCTGAGGACACTGCCATCTATTACTGTGCTCGCGATTACTACGGTGGTAGCCCCTATGCTATGGACAACTGGGGTCAAGGA…	IGHV14-1*01	IGHD1-1*01,IGHD1-1*02	IGHJ4*01	17	100	83.3	96.1	83.3	94.7	66.7	ATGGAATCACAGACTCTGGTCTTCATATCCATACTGCTCTGGTTATATGGTGCTGATGGGAACATTGTAATGACCCAATCTCCCAGATCCATGTCCATGTCAGTAGGAGAGAGGGTCACCTTGAACTGCAAGGCCAGTGAGATTGTGGGTACTTATGTATCCTGGTATCAACAGAAACCAGAGCAGTCTCCTAAACTGCTGATATACGGGGCATCCAACCGGTACACTGGGGTCCCCGATCGCTTCACAGGCAGTGGATCTGTAACAGATTTCACTCTGACCATCAGCACTGTGCAGGCTGAAGACCTTGCAGATTATTACTGTGGACAGAGTTACAGCTATCCTCTCACGTTCGGTGCTGGGACCAAGCTGGAGCTGAAACGG	IGKV6-20*01	IGKJ5*01	6	98.7	100	100	100	96.3	100
90	S601	3	10	IgA	ATGAAATGCAGCTGGGTCATCTTCTTCCTGATGGCAGTGGTTATAGGGGTCAATTCAGAGGTTCAGCTGCAGCAGTCTGGGGCAGAGCTTGTGAGGCCAGGGGCCTCAGTCAAGTTGTCCTGCACAGCTTCTGGCTTCAACATTAAAGACAGCCTTATGCACTGGGTGAAGCAGAGGCCTGAACAGGGCCTGGAGTGGATTGGATGGATTGATCCTGAGGATGGTGAAACTAAATATGCCCCGAAGTTCCAGGACAAGGCCACTGTAACTGCAGACACATCCTCCAACACAGCCTACCTGCAGCTCAGCAGCCTGACATCTGAGGACACTGCCATCTATTACTGTACTCGCGATTACTACGATGGTAGCCCCTATGCTATGGACTACTGGGGTCAAGGA…	IGHV14-1*01	IGHD1-1*01,IGHD1-1*02	IGHJ4*01	11	100	83.3	98	95.8	95.6	100	ATGGAATCACAGACTCTGGTCTTCATATCCATACTGCTCTGGTTATATGGTGCTGATGGGAACATTGTAATGACCCAAACTCCCAAATCCATGTCCATGTCAGTAGGAGAGAGGGTCACCTTGAGCTGCAAGGCCAGTGAGAATGTGGGTACTTATGTATCCTGGTATCAACAGAAACCAGAGCAGTCTCCTAAACTGCTGATATACGGGGCATCCAACCGGTACACTGGGGTCCCCGATCGGTTCACAGGCAGTGGATCTGTAACAGATTTCACTCTGACCATCAGCAGTGTGCAGGCTGAAGACCTTGCAGATTATTTCTGTGGACAGAGTTACAGCTATCCTCTCACGTTCGGTGCTGGGACCAAGCTGGAGCTGAAACGG	IGKV6-20*01	IGKJ5*01	5	98.7	100	100	100	94.4	95.5
91	S610	3	10	IgA	ATGAAATGCAGCTGGGTCATCTTCTTCCTGATGGCAGTGGTTATAGGGGTCAATTCAGAGGTTCAGCTGCAGCAGTCTGGGGCAGAGCTTGTGAGGCCAGGGGCCTCAGTCAAGTTGTCCTGCACAGCTTCTGGCTTCAACATTAAAGACAGCCTTATGCACTGGGTGAAGCAGAGGCCTGAACAGGGCCTGGAGTGGATTGGATGGATTGCTCCTGAGGATGGTGAAACTAAATATGCCCCGAAGTTCCAGGACAAGGCCACTGTAACTGCAGACACATCCTCCAACACAGCCTACCTGCAGCTCAACAGCCTGACATCTGAGGACACTGCCATCTATTACTGTACTCGCGATTACTTCGGTGGTAGCCCCTATGCTATGGACTACTGGGGTCAAGGA…	IGHV14-1*01	IGHD1-1*01,IGHD1-1*02	IGHJ4*01	13	100	83.3	98	91.7	94.7	100	ATGGAATCACAGACTCTGGTCTTCATATCCATACTGCTCTGGCTATATGGTGCTGATGGGAACATTGTAATGACCCAATCTCCCAAATCCATGTCCATGTCAGTAGGAGAGAGGGTCACTTTGAGCTGCAAGGCCAGTGAGAATGTGGGTACTTATGTATCCTGGTATCAACAGAAACCAGAGCAGTCTCCTAAACTGCTGATATACGGGGCATCCAACCGGTACACTGGGGTCCCCGATCGGTTCACAGGCAGTGGATCTGTAATAGATTTCCCTCTGCCCATCAGCAGTGTGCAGGCTGAAGACCTTGCAGATTATTACTGTGGACAGAGTTACAGCCATCCTCTCACGTTCGGTGCTGGGACCAAGCTGGAGATGAAACGG	IGKV6-20*01	IGKJ5*01	8	100	100	96.1	100	97.2	100
92	S613	3	10	IgA	ATGAAATGCAGCTGGGTCATCTTCTTCCTGATGGCAGTGGTTATAGGGGTCAATTCAGAGGTTCAGCTGCAGCAGTCTGGGGCAGAGCTTGTGAGGCCAGGGGCCTCAGTCAAGTTGTCCTGCACAGCTTCTGGCTTCAACATTAAAGACAGCCTTATGCACTGGGTGAAGCAGAGGCCTGAACAGGGCCTGGAGTGGATTGGATGGATTGATCCTGAGGATGGTGAAACTAAATATGCCCCGAAGTTCCGGGACAAGGCCACTGTAACTTCAGACACATCCTCCAACACAGCCTACCTGCAGCTCAGCAGCCTGACATCTGAGGACACTGCCATCTATTACTGTTCTCGCGATTACTACGCTGGTAGCCCCTATAGTATGGACTACTGGGGTCAAGGA…	IGHV14-1*01	IGHD1-1*01,IGHD1-1*02	IGHJ4*01	14	100	83.3	98	95.8	93.9	66.7	ATGGAATCACAGACTCTGGTCTTCATATCCATACTGCTCTGGTTATATGGTGCTGATGGGAACATTGTAATGACCCAATCTCCCAAATCCATGTCCATGTCAGTAGGAGAGAGGGTCACCTTGAGCTGCAAGGCCAGTGAGAATGTGGGTACTTATGTATCATGGTATCAACAGAAACCAGAGCAGTCTCCTAAAGTGCTGATATACGGGGCATCCAACCGGTACACTGGGGTCCCCGATCGGTTCACAGGCAGTGGATCTGTAACAGATTTCACTCTGACCATCAGCAGTGTGCAGGCTGAAGACCTTGCAGATTATTACTGTGGACAGAGTTACAGCTATCCTCTCACGTTCGGTGCTGGGACCAAGCTGGAGCTGAAACGG	IGKV6-20*01	IGKJ5*01	5	100	100	98	100	97.2	100
93	S621	3	10	IgA	ATGAAATGCAGCTGGGTCATCTTCTTCCTGATGGCAGTGGTTATAGGGGTCAATTCAGAGGTTCAGCTGCAGCAGTCTGGGGCAGAGCTTGTGAGGCCAGGGGCCTCAGTCAAGTTGTCCTGCACAGCTTCTGGCTTCATCATTAAAGACAGCCTTATGCACTGGGTGAAGCAGAGGCCTGAACAGGGCCTGGAGTGGATTGGATGGATTGATCCTGAGGATGGTGAAACTAAATATGCCCCGAAGTTCCAGGACAAGGCCACTGTAACTGCAGACACATCCTCCAACACAGCCTACCTGCAGCTCAGCAGCCTGACATCTGAGGACACTGCCATCTTTTACTGTACTCGCGATTACTACGATGGTAGCCCCTATGCTTTGGACTACTGGGGTCAAGGA…	IGHV14-1*01	IGHD1-1*01,IGHD1-1*02	IGHJ4*01	13	100	79.2	98	95.8	94.7	100	ATGGAATCACAGACTCTGGTCTTCATATCCATACTGCTCTGGTTATATGGTGCTGACGGGAACATTGTAATGACCCAATCTCCCAAATCCATGTCCATGTCAGTAGGAGAGAGGGTCACCTTGAGCTGCAAGGCCAGTGAGAATGTGGGTACTTATGTATCCTGGTATCAACAGAAACCAGAGCAGTCTCCTAAAGTGCTGATATACGGGGCATCCAACCGGTACACTGGGGTCCCCGATCGGTTCACAGGCAGTGGATCTGTAACAGATTTCACTCTGACCATCAGCAGTGTGCAGGCTGAAGACCTTGCAGATTATTACTGTGGACAGAGTTACAGCTATCCTCTCACGTTCGGTGCTGGGACCAAGCTGGAGCTGAAACGG	IGKV6-20*01	IGKJ5*01	4	100	100	92.2	100	96.3	100
94	S623	3	10	IgA	ATGAAATGCAGCTGGGTCATCTTCTTCCTGATGGCAGTGGTTATAGGGGTCAATTCAGAGGTTCAACTGCAGCAGTCTGGGGCAGAGCTTGTGAGGCCAGGGGCCTCAGTCAAGTTGTCCTGCACAGCTTCTGGCTTCAACATTAAAGACAGCCTTATGCACTGGGTGAAGCAGAGGCCTGAACAGGGCCTGGAGTGGATTGGATGGATTGATCCTGAGGATGTTGAAACTAAATATGCCCCGAAGTTCCGGGACAAGGCCACTGTAACTTCAGACACATCCTCCAACACAGCCTACCTGCAGCTCAGCAGCCTGACATCTGAGGACACTGCCATCTATTACTGTACTCGCGATTACTACGCTGGTAGCCCCTATGCTATGGACTACTGGGGTCAAGGA…	IGHV14-1*01	IGHD1-1*01,IGHD1-1*02	IGHJ4*01	15	98.7	83.3	98	91.7	93.9	100	ATGGAATCACAGACTCTGGTCTTCATATCCATACTGCTCTGGTTATATGGTGCTGATGGGAACATTGTAATGACCCAATCTCCCAAATCCATGTCCATGTCAGTAGGAGAGAGGGTCACCTTGAGCTGCAAGGCCAGTGAGAATGTGGGTACTTATGTATCATGGTATCAACAGAAACCGGAGCAGTCTCCTAAAGTGTTGATATACGGGGCATCCAACCGGTACACTGGGGTCCCCGATCGGTTCACAGGCACTGGATCTGTAACAGATTTCACTCTGACCATCAGCAGTGTGCAGGCTGAAGACCTTGCAGATTATTACTGTGGACAGAGTTACAGCTATCCTCTCACGTTCGGTGCTGGGACCAAGCTGGAGCTGAAACGG	IGKV6-20*01	IGKJ5*01	8	100	100	100	100	97.2	100
95	S624	3	10	IgA	ATGAAATGCAGCTGGGTCATCTTCTTCCTGATGGCAGTGGTTATAGGGGTCAATTCAGAGGTTCAGCTGCAGCAGTCTGGGGCAGAGCTTGTGAGGCCAGGGGCCTCAGTCAAGTTGTCCTGCACAGCTTCTGGCTTCAACATTAAAGACAGCCTTATGCACTGGGTGAAGCAGAGGCCTGAACAGGGCCTGGAGTGGATTGGATGGATTGATCCTGAGGATGGTGAAACTAAATATGCCCCGAAGTTCCAGGACAAGGCCACTGTAACTGCAGACACATCCTCCAACACAGCCTACCTGCAGCTCAGCAGCCTGACATCTGAGGACACTGCCATCTATTACTGTACTCGCGATTACTACGATGGTAGCCCCTATGCTATGGACTACTGGGGTCAAGGA…	IGHV14-1*01	IGHD1-1*01,IGHD1-1*02	IGHJ4*01	11	100	83.3	98	95.8	95.6	100	ATGGAATCACAGACTCTGGTCTTCATATCCATACTGCTCTGGTTATATGGTGCTGATGGGAACATTGTAATGACCCAATCTCCCAAATCCATGTCCATGTCAGTAGGAGAGAGGGTCACCTTGAGCTGCAAGGCCAGTGAGAATGTGGGTACTTATGTATCCTGGTATCAACAGAAACCAGAGCAGTCTCCTAAACTGCTGATATACGGGGCATCCAACCGGTACACTGGGGTCCCCGATCGGTTCACAGGCAGTGGATCTGTAACAGATTTCACTCTGACCATCAGCAGTGTGCAGGCTGAAGACCTTGCAGATTATTACTGTGGACAGAGTTACAGCTATCCTCTCACGTTCGGTGCTGGGACCAAGCTGGAGCTGAAACGG	IGKV6-20*01	IGKJ5*01	3	97.4	94.4	100	100	97.2	100
96	S630	3	10	IgA	ATGAAATGCAGCTGGGTCATCTTCTTCCTGATGGCAGTGGTTATAGGGGTCAATTCAGAGGTTCAGCTGCAGCAGTCTGGGGCAGAGCTTGTGAGGCCAGGGGCCTCAGTCAAGTTGTCCTGCACAGCTTCTGGCTTCAACATTAAAGACAGCCTTATGCACTGGGTGAAGCAGAGGCCTGAACAGGGCCTGGAGTGGATTGGCTGGATTGATATTGAAGATGGTGAAACTAAATGTGCCCCGAAGTTCCAGGACAGGGCCACTATAACTGCAGACACATCCTCCAACACAGCCTACCTGCAGCTCAGCAGCCTGACATCTGAGGACACTGCCATCTATTACTGTGCTCGCGATTACTACGGTGGTAGCCCCTATGCTATGGACAACTGGGGTCAAGGA…	IGHV14-1*01	IGHD1-1*01,IGHD1-1*02	IGHJ4*01	17	100	83.3	96.1	83.3	94.7	66.7	ATGGAATCACAGACTCTGGTCTTCATATCCATACTGCTCTGGTTATATGGTGCTGATGGGAACATTGTAATGACCCAATCTCCCAGATCCATGTCCATGTCAGTAGGAGAGAGGGTCACCTTGAACTGCAAGGCCAGTGAGATTGTGGGTACTTATGTATCCTGGTATCAACAGAAACCAGAGCAGTCTCCTAAACTGCTGATATACGGGGCATCCAACCGGTACACTGGGGTCCCCGATCGCTTCACAGGCAGTGGATCTGTAACAGATTTCACTCTGACCATCAGCACTGTGCAGGCTGAAGACCTTGCAGATTATTACTGTGGACAGAGTTACAGCTATCCTCTCACGTTCGGTGCTGGGACCAAGCTGGAGCTGAAACGG	IGKV6-20*01	IGKJ5*01	6	98.7	100	100	100	96.3	95.5
97	S638	3	10	IgA	ATGAAATGCAGCTGGGTCATCTTCTTCCTGATGGCAGTGGTTATAGGGGTCAATTCAGAGGTTCAGCTGCAGCAGTCTGGGGCAGAGCTTGTGAGGCCAGGGGCCTCAGTCAAGTTGTCCTGCACAGCTTCTGGCTTCAACATTAAAGACAGCCTTATGCACTGGGTGAAGCAGAGGCCTGAACAGGGCCTGGAGTGGATTGGATGGATTGATCCTGACGATGGTGAAACTAAATATGCCCCGAAGTTCCAGGACAAGGCCACTGTAACTGCAGACACATCCTCCAACACAGCCTACCTGCAGCTCAGCAGCCTGACATCTGAGGACACTGCCATCTATTACTGTACTCGCGATTACTACGATGGTAGCCCCTATACTATGGACTGCTGGGGTCAAGGA…	IGHV14-1*01	IGHD1-1*01,IGHD1-1*02	IGHJ4*01	12	100	83.3	98	91.7	95.6	100	ATGGAATCACAGACTCTGGTCTTCATATCCATACTGCTCTGGCTATATGGTGCTGATGGGAACATTGTAATGACCCAATCTCCCAAATCCATGTCCATGTCAGTAGGAGAGAGGGTCACTTTGAGCTGCAAGGCCAGTGAGAATGTGGGTACTTATGTATCCTGGTATCAACAGAAACCAGAGCAGTCTCCTAAACTGCTGATATACGGGGCATCCAACCGGTACACTGGGGTCCCCGATCGGTTCACAGGCAGTGGATCTGTAATAGATTTCACTCTGACCATCAGCAGTGTGCAGGCTGAAGACCTTGCAGATTATTACTGTGGACAGAGTTACAGCCATCCTCTCACGTTCGGTGCTGGGACCAAGCTGGAGCTGAAACGG	IGKV6-20*01	IGKJ5*01	6	98.7	94.4	98	100	97.2	100
98	S639	3	10	IgA	ATGAAATGCAGCTGGGTCATCTTCTTCCTGATGGCAGTGGTTATAGGGGTCAATTCAGAGGTTCAGCTGCAGCAGTCTGGGGCAGAGCTTGTGAGGCCAGGGGCCTCAGTCAAGTTGTCCTGCACAGCTTCTGGCTTCAACATTAAAGACAGCCTTATGCACTGGGTGAAGCAGAGGCCTGAACAGGGCCTGGAGTGGATTGGATGGATTGATCCTGAGGATGGTGAAACTAAATATGCCCCGAAGTTCCAGGGCAAGGCCACTCTAACTGCAGACGCATCCTCCAACACAGCCTACCTGCAGCTCAGCAGCCTGACATCTGAGGACACTGCCATCTATTACTGTGCTCGCGATTACTACGGTGGTAGCCCCTATGCTATGGACTACTGGGGTCAAGGA…	IGHV14-1*01	IGHD1-1*01,IGHD1-1*02	IGHJ4*01	12	100	83.3	98	95.8	95.6	66.7	ATGGAATCACAGACTCTGGTCTTCATATCCATACTGCTCTGGTTATATGGTGCTGATGGGAACATTGTAATGACCCAATCTCCCAAATCCATGTCCATGTCAGTAGGGGAGAGGGTCACCTTGAGCTGCAAGGCCAGTGAGAATGTGGGTTCTTATGTATCCTGGTATCAACAGAAACCAGAGCAGTCTCCTAAACTACTGATATACGGGGCATCCAACCGATACACTGGGGTCCCCGATCGCTTCACAGGCAGTGGATCTGCAACAGATTTCACTCTGACCATCAGCAGTGTGCAGGCTGAAGACCTTGTAGATTATTACTGTGGACAGAGTTACAGCTATCCTCTCACGTTCGGTGCTGGGACCAAGCTGGAGCTGAAACGG	IGKV6-20*01	IGKJ5*01	6	100	100	92.2	100	97.2	100
99	S640	3	10	IgA	ATGAAATGCAGCTGGGTCATCTTCTTCCTGATGGCAGTGGTTATAGGGGTCACTTCAGAGGTTCAGCTGCAGCAGTCTGGGGCAGAGCTTGTGAGGCCAGGGGCCTCAGTCAAGTTGTCCTGCACAGCTTCTGGCTTCAACATTAAAGACAGCCTTATGCACTGGGTGAAGCAGAGGCCTGAACAGGGCCTGGAGTGGATTGGATGGATTGATCCTGAGGATGGTGAAACTAAATATGCCCCGAAGTTCCGGGACAAGGCCACTGTAACTTCAGACACATCCTCCAATACAGCCTACCTGCAGCTCAGCAGCCTGACATCTGAGGACACTGCCATCTATTACTGTACTCGCGATTACTACGCTGGTAGTCCCTATGCTATGGACTACTGGGGTCAAGGA…	IGHV14-1*01	IGHD1-1*01,IGHD1-1*02	IGHJ4*01	14	100	83.3	98	95.8	93	100	ATGGAATCACAGACTCTGGTCTTCATATCCATACTGCTCTGGTTATATGGTGCTGATGGGAACATTGTAATGACCCAATCTCCCAAATCCATGTCCATGTCAGTAGGAGAGAGGGTCACCTTGAGCTGCAAGGCCAGTGAGAATGTGGGTACTTATGTATCATGGTATCAACAGAAACCAGAACAGTCTCCTGAAGTGCTGATATACGGGGCATCCAACCGGTACACTGGGGTCCCCGATCGGTTCACAGGCAGTGGATCTGTAACAGATTTCACTCTGACCATCAGCAGTGTGCAGGCTGAAGACCTTGCAGATTATTACTGTGGACAGAGTTACAGCTATCCTCTCACGTTCGGTGCTGGGACCAAGCTGGAGCTGAAACGG	IGKV6-20*01	IGKJ5*01	7	100	100	98	100	97.2	100
100	S641	3	10	IgA	ATGAAATGCAGCTGGGTCATCTTCTTCCTGATGGCAGTGGTTATAGGGGTCAATTCAGAGGTTCAGCTGCAGCAGTCTGGGGCAGAGCTTGTGAGGCCAGGGGCCTCAGTCAAGTTGTCCTGCACAGCTTCTGGCTTCATCATTAAAGACAGCCTTATGCACTGGGTGAAGCAGAGGCCTGAACAGGGCCTGGAGTGGATTGGATGGATTGATCCTGAGGATGGTGAAACTAAATATGCCCCGAAGTTCCAGGACAAGGCCACTGTAACTGCAGACACATCCTCCAACACAGCCTACCTGCAGCTCAGCAGCCTGACATCTGAGGACACTGCCATCTTTTACTGTACTCGCGATTACTACGATGGTAGCCCCTATGCTTTGGACTACTGGGGTCAAGGA…	IGHV14-1*01	IGHD1-1*01,IGHD1-1*02	IGHJ4*01	13	100	79.2	98	95.8	94.7	100	ATGGAATCACAGACTCTGGTCTTCATATCCATACTGCTCTGGTTATATGGTGCTGACGGGAACATTGTAATGACCCAATCTCCCAAATCCATGTCCATGTCAGTAGGAGAGAGGGTCACCTTGAGCTGCAAGGCCAGTGAGAATGTGGGTACTTATGTATCCTGGTATCAACAGAAACCAGAGCAGTCTCCTAAAGTGCTGATATACGGGGCATCCAACCGGTACACTGGGGTCCCCGATCGGTTCACAGGCAGTGGATCTGTAACAGATTTCACTCTGACCATCAGCAGTGTGCAGGCTGAAGACCTTGCAGATTATTACTGTGGACAGAGTTACAGCTATCCTCTCACGTTCGGTGCTGGGACCAAGCTGGAGCTGAAACGG	IGKV6-20*01	IGKJ5*01	4	100	100	100	100	97.2	100
101	S642	3	10	IgA	ATGAAATGCAGCTGGGTCATCTTCTTCCTGATGGCAGTGGTTATAGGGGTCAATTCAGAGGTTCAGCTGCAGCAGTCTGGGGCAGAGCTTGTGAGGCCAGGGGCCTCAGTCAAGTTGTCCTGCACAGCTTCTGGCTTCAACATTAAAGACAGCCTTATGCACTGGGTGAAGCAGAGGCCTGAACAGGGCCTGGAGTGGATTGGATGGATTGATCCTGAGGATGGTGAAACTAAATATGCCCCGAAGTTCCAGGACAAGGCCACTGTAACTGCAGACACATCCTCCAACACAGCCTACCTGCAGCTCAGCAGCCTGACATCTGAGGACACTGCCATCTATTACTGTACTCGCGATTATTACGATGGTAGCCCCTATGCTATGGACTACTGGGGTCAAGGA…	IGHV14-1*01	IGHD1-1*02	IGHJ4*01	11	100	83.3	98	95.8	95.6	100	ATGGAATCACAGACTCTGGTCTTCATATCCATACTGCTCTGGTTATATGGTGCTGATGGGAACATTGTAATGACCCAATCTCCCAAATCCATGTCCATGTCAGTAGGAGAGAGGGTCACCTTGAGCTGCAAGGCCAGTGAGAATGTGGGTACTTATGTATCCTGGTATCAACAGAAACCAGAGCAGTCTCCTAAACTGCTGATATACGGGGCATCCAACCGGTACACTGGGGTCCCCGATCGGTTCACAGGCAGTGGATCTGTAACAGATTTCACTCTGACCATCAGCAGTGTGCAGGCTGAAGACCTTGCAGATTATTACTGTGGACAGAGTTACAGCTATCCTCTCACGTTCGGTGCTGGGACCAAGCTGGAGCTGAAACGG	IGKV6-20*01	IGKJ5*01	3	98.7	100	100	100	97.2	100
102	S644	3	10	IgA	ATGAAATGCAGCTGGGTCATCTTCTTCCTGATGGCAGTGGTTATAGGGGTCAATTCAGAGGTTCAGCTGCAGCAGTCTGGGGCAGAGCTTGTGAGGCCAGGGGCCTCAGTCAAGTTGTCCTGCACAGCTTCTGGCTTCAACATTAAAGACAGCCTTATGCACTGGGTGAAGCAGAGGCCTGAACAGGGCCTGGAGTGGATTGGATGGATTGATCCTGAGGATGGTGAAACTAAATATGCCCCGAAGTTCCAGGACAAGGCCACTGTAACTGCAGACACATCCTCCAACACAGCCTACCTGCAGCTCAGCAGCCTGACATCTGAGGACACTGCCATCTATTACTGTACTCGCGATTACTACGATGGTAGCCCCTATGCTATGGACTACTGGGGTCAAGGA…	IGHV14-1*01	IGHD1-1*01,IGHD1-1*02	IGHJ4*01	11	100	83.3	98	95.8	95.6	100	ATGGAATCACAGACTCTGGTCTTCATATCCATACTGCTCTGGTTATATGGTGCTGATGGGAACATTGTAATGACCCAATTTCCCAAATCCATGTCCATGTCAGTAGGAGAGAGGGTCACCTTGAGCTGCAAGGCCAGTGAGAATGTGGGTACTTATGTATCCTGGTATCAACAGAAACCAGAGCAGTCTCCTAAACTGCTGATATACGGGGCATCCAACCGGTACACTGGGGTCCCCGATCGGTTCACAGGCAGTGGATCTGTAACAGATTTCACTCTGACCATCAGCAGTGTGCAGGCTGAAGACCTTGCAGATTATTACTGTGGACAGAGTTACAGCTATCCTCTCACGTTCGGTGCTGGGACCAAGCTGGAGCTGAAACGG	IGKV6-20*01	IGKJ5*01	4	100	100	96.1	100	97.2	100
103	S645	3	10	IgA	ATGAAATGCAGCTGGGTCATCTTCTTCCTGATGGCAGTGGTTATAGGGGTCAATTCAGAGGTTCAGCTGCAGCAGTCTGGGGCAGAGCTTGTGAGGCCAGGGGCCTCAGTCAAGTTGTCCTGCACAGCTTCTGGCTTCAACATTAAAGACAGCCTTATGCACTGGGTGAAGCAGAGGCCTGAACAGGGCCTGGAGTGGATTGGATGGATTGATCCTGAGGATGGTGAAACTAAATATGCCCCGAAGTTCCGGGACAAGGCCACTGTAACTTCAGACACATCCTCCAACACAGCCTACCTGCAGCTCAGCAGCCTGACATCTGAGGACACTGCCATCTATTACTGTTCTCGCGATTACTACGCTGGTAGCCCCTATAGTATGGACTACTGGGGTCAAGGA…	IGHV14-1*01	IGHD1-1*01,IGHD1-1*02	IGHJ4*01	14	100	83.3	98	95.8	93.9	66.7	ATGGAATCACAGACTCTGGTCTTCATATCCATACTGCTCTGGTTATATGGTGCTGATGGGAACATTGTAATGACCCAATCTCCCAAATCCATGTCCATGTCAGTAGGAGAGAGGGTCACCTTGAGCTGCAAGGCCAGTGAGAATGTGGGTACTTATGTATCATGGTATCAACAGAAACCAGAGCAGTCTCCTAAAGTGCTGATATACGGGGCATCCAACCGGTACACTGGGGTCCCCGATCGGTTCACAGGCAGTGGATCTGTAACAGATTTCACTCTGACCATCAGCAGTGTGCAGGCTGAAGACCTTGCAGATTATTACTGTGGACAGAGTTACAGCTATCCTCTCACGTTCGGTGCTGGGACCAAGCTGGAGCTGAAACGG	IGKV6-20*01	IGKJ5*01	5	100	100	94.1	100	97.2	100
104	S647	3	10	IgA	ATGAAATGCAGCTGGGTCATCTTCTTCCTGATGGCAGTGGTTATAGGGGTCACTTCAGAGGTTCAGCTGCAGCAGTCTGGGGCAGAGCTTGTGAGGCCAGGGGCCTCAGTCAAGTTGTCCTGCACAGCTTCTGGCTTCAACATTAAAGACAGCCTTATGCACTGGGTGAAGCAGAGGCCTGAACAGGGCCTGGAGTGGATTGGATGGATTGATCCTGAGGATGGTGAAACTAAATATGCCCCGAAGTTCCGGGACAAGGCCACTGTAACTTCAGACACATCCTCCAATACAGCCTACCTGCAGCTCAGCAGCCTGACATCTGAGGACACTGCCATCTATTACTGTACTCGCGATTACTACGCTGGTAGTCCCTATGCTATGGACTACTGGGGTCAAGGA…	IGHV14-1*01	IGHD1-1*01,IGHD1-1*02	IGHJ4*01	14	100	83.3	98	95.8	93	100	ATGGAATCACAGACTCTGGTCTTCATATCCATACTGCTCTGGTTATATGGTGCTGATGGGAACATTGTAATGACCCAATCTCCCAAATCCATGTCCATGTCAGTAGGAGAGAGGGTCACCTTGAGCTGCAAGGCCAGTGAGAATGTGGGTACTTATGTATCATGGTATCAACAGAAACCAGAACAGTCTCCTAAAGTGCTGATATACGGGGCATCCAACCGGTACACTGGGGTCCCCGATCGGTTCACAGGCAGTGGATCTGTAACAGATTTCACTCTGACCATCAGCAGTGTGCAGGCTGAAGACCTTGCAGATTATTACTGTGGACAGAGTTACAGCTATCCTCTCACGTTCGGTGCTGGGACCAAGCTGGAGCTGAAACGG	IGKV6-20*01	IGKJ5*01	6	100	100	100	100	99.1	85
105	N217	4	11	IgA	ATGGGATGGAGCTGTATCATCCTCTTTTTGGTAGCAGCAGCTACAGGTGTCCACTCCCAGGTCCAACTGCAGCAGCCTGGGGCTGAGCTGGTGAAGCCTGGGACTTCAGTGAAGCTGTCCTGCAAGGCTTCTGGCTACACCTTCACCAGCTACTGGATGCACTGGGTGAAGCAGAGGCCTGGACAAGGCCTTGAATGGATTGGTAATATTGACCCTTCTGATAGTGAAACTCACTACAATCAAAAGTTCAAGGACAAGGCCACTTTGACTGTTGACAAATCCTCCACCACAGCCTACATGCAACTCAGCAGCCTGACATCTGAGGACTCTGCGGTCTATTACTGTACAAGAGATTACTACGATGGTAGCTTGGCCTGGTTTGCTTACTGGGGCCAAGGG…	IGHV1-52*01	IGHD1-1*01,IGHD1-1*02	IGHJ3*01	11	97.3	100	92.2	100	96.5	83.3	ATGTCCTCTGCTCAGTTCCTTGGTCTCCTGTTGCTCTGTTTTCAAGGTACCAGATGTGATATCCAGATGACACAGACTACATCCTCCCTGTCTGCCTCTCTGGGAGACAGAGTCACCATCAGTTGCAGGGCAAGTCAGGATATTAGCAATTATTTAAACTGGTATCAGCAGAAACCAGATGGAACTGTTAAACTCCTGATCTACTACACATCAAGATTACACTCAGGAGTCCCATCAAGGTTCAGTGGCAGTGGGTCTGGGACAGATTATTCTCTCACCATCAGCAACCTGGAACCTGAAGATTTTGCCACTTACTATTGTCAGCACTATAGTAGCCTTCCGTGGACGTTCGGTGGAGGCACCAAGCTGGAAATCAAACGG	IGKV10-94*03	IGKJ1*01	4	100	100	100	100	99.1	85
106	L001	ND	Lung	IgA	ATGAAATGCAGCTGGGTCATCTTCTTCCTGATGGCAGTGGTTATAGGGGTCAATTCAGAGGTTCAGCTGCAGCAGTCTGGGGCAGAGCTTGTGAGGCCAGGGGCCTCAGTCAAATTGTCTTGCACAGCTTCTGGCTTCAACATTAAAGACAGCCTTATGCACTGGGTGAAGCAGAGGCGTGAACAGGGCCTGGAGTGGATTGGATGGATTGATCCTGAGGATGGTGAAACTAAATGTGCCCCGAAGTTCCAGGTCAAGGCCGCTGTAACTGCAGACACATCCTCCAACACAGCCTACCTGCAGCTCAGCAGCCTGACATCTGAGGACACTGCCATCTATTACTGTACTCGCGATTACTACGATGGTAGCCCCTATGCTATGGACTACTGGGGTCAAGGA…	IGHV14-1*01	IGHD1-1*01,IGHD1-1*02	IGHJ4*01	16	97.3	83.3	96.1	95.8	93.9	100	ATGATGTCCTCTGCTCAGTTCCTTGGTCTCCTGTTGCTCTGTTTTCAAGGTACCAGATGTGATATCCAGATGACACAGACTACATCCTCCCTGTCTGCCTCTCTGGGAGACAGAGTCACCATCAGTTGCAGGGCAAGTCAGGATATTAGCAATTATTTAAACTGGTATCAGCAGAAACCAGATGGAACTGTTAAACTCCTGATCTACTACACATCAAGATTACACTCAGGAGTCCCATCAAGGTTCAGTGGCAGTGGGTCTGGGACAGATTATTCTCTCACCATCAGCAACCTGGAACCTGAAGATTTTGCCACTTACTATTGTCAGCACTATAGTAGCCTTCCGTGGACGTTCGGAGGAGGCACCAAGCTGGAAATCAAACGG	IGKV10-94*03,IGKV10-94*08	IGKJ1*01	4	100	100	100	100	99.1	85
107	L005	ND	lung	IgA	ATGGCTGTCCTGGCGCTACTCCTCTGCCTGATGACTTTCCCAAGCTGTGCCCTGTCCCAGGTGCAGCTGAAGGAGTCAGGACCTGGCCTAGTGGCGCCCTCACAGAGCCTGTCCATCACATGCACTGTCTCTGGGTTCTCATTAACCAACTATGCTATAAGCTGGGTTCGCCAGCCACCAGGAAAGGGTCTGGAGTGGCTTGGAATAATCTGGACTGGTGGAGGCACAAATTATAATTCAGCTCTCAAATCCAGACTGAGCATCAGCAAAGACAACTCCAAGAGTCAAGTTTTCTTAAAAATGAACAGTCTGCAAACTGATGACACAGCCAGGTACTACTGTGCCAGATTCCCCTACTATACTTACTATAGTGACGGCGTGGAAGCTATGGACTACTGG…	IGHV2-9-1*01	IGHD2-12*01	IGHJ4*01	4	98.7	95.8	98	95.2	100	100	ATGTCCTCTGCTCAGTTCCTTGGTCTCCTGTTGCTCTGTTTTCAAGGTACCAGATGTGATATCCAGATGACACAGACTACATCCTCCCTGTCTGCCTCTCTGGGAGACAGAGTCACCATCAGTTGCAGGGCAAGTCAGGATATTAGCAATTATTTAAACTGGTATCAGCAGAAACCAGATGGAACTGTTAAACTCCTGATCTACTACACATCAAGATTACACTCAGGAGTCCCATCAAGGTTCAGTGGCAGTGGGTCTGGGACAGATTATTCTCTCACCATCAGCAACCTGGAACCTGAAGATTTTGCCACTTACTATTGTCAGCACTATAGTAGCCTTCCGTGGACGTTCGGAGGAGGCACCAAGCTGGAAATCAAACGG	IGKV10-94*03,IGKV10-94*08	IGKJ1*01	4	98.7	97	98	100	98.1	94.4
108	L010	ND	lung	IgA	ATGGGATGGAACTGGATCTTTATTTTAATCCTGTCAGTAACTACAGGTGTCCACTCTGAGGTCCAGCTGCAGCAGTCTGGACCTGAGCTGGTGAAGCCTGGGGCTTCAATGAAGATATCCTGCAAGGCTTCTGGTTACTCATTCACTGACTACTACATACACTGGGTGAAGCAAAGTCCTGAAAAGAGCCTTGAGTGGATTGGAGAGATTAATCCTGGCACTGGTGGTACTACCTACAACCAGAAATTCAAGGCCAAGGCCACATTGACTGTAGACAAATCCTCCAGCACAGCCTACATGCAGCTCAAGAGCCTGACATCTGAGGACTCTGCAGTCTATTACTGTGCAAGAGATTACTACGATGGTAGTTCTGCCTGGTTTGCTTACTGGGGCCAAGGG…	IGHV1-42*01	IGHD1-1*01,IGHD1-1*02	IGHJ3*01	6	98.7	95.8	96.1	95.8	99.1	100	ATGATGTCCTCTGCTCAGTTCCTTGGTCTCCTGTTGCTCTGTTTTCAAGGTACCAGATGTGATATCCAGATGACACAGACTACATCCTCCCTGTCTGCCTCTCTGGGAGACAGAGTCACCATCAGTTGCAGGGCAAGTCAGGATATTAGCAATTATTTAAACTGGTATCAGCAGAAACCAGATGGAACTGTTAAACTCCTGATCTACTACACATCAAGATTACACTCAGGAGTCCCAGCAAGGTTCAGTGGCAGTGGGTCTGGGACAGAATATTCTCTCACCATCAGCAACCTGGAACCTGAAGATATTGCCATTTACTACTGTCACCAGTATAGTAAGCTTCCGTGGACGCTCGGTGGAGGCACCAAGCTGGAAATCAAACGG	IGKV10-94*03,IGKV10-94*08	IGKJ1*01	5	100	100	100	100	99.1	85
109	L015	ND	lung	IgA	ATGGCTGTCCTGGCGCTACTCCTCTGCCTGATGACTTTCCCAAGCTGTGCCCTGTCCCAGGTGCAGCTGAAGGAGTCAGGACCTGGCCTGGTGGCGCCCTCACAGAGCCTGTCCATCACATGCACTGTCTCTGGGTTCTCATTAATGAACTATGCTATAAGCTGGGTTCGCCAGCCACCAGGAAAGGGTCTGGAGTGGCTTGGAGTAATATGGACTGGTGGAGGCACAAATTATAATTTAGCTCTCAAATCCAGACTGAGCATCAGCAAAGACAACTCCAAGAGTCAAGTTTTCTTAAAAATGAACAGTCTGCAAACTGATGACACAGCCAGGTACTACTGTGCCAGGTATAATTACTACAGTTACGACGTCGGTTTTGGCTACTGGGGCCAAGGCACC…	IGHV2-9-1*01	IGHD2-12*01	IGHJ2*01	4	100	87.5	100	100	99.1	100	ATGAAGTTGCCTGTTAGGCTGTTGGTGCTGATGTTCTGGATTCCTGCTTCCAGCAGTGATGTTGTGATGACCCAAACTCCACTCTCCCTGCCTGTCAGTCTTGGAGATCAAGCCTCCATCTCTTGCAGATCTAGTCAGAGCATTGTACATAGTGATGGAAACACCTATTTAGAATGGTACCTGCAGAAGCCAGGCCAGTCTCCAAAGCTCCTGATCTACAAAGTTTCCAACCGATTTTCTGGGGTCCCAGACAGGTTCAGTGGCAGTGGATCAGGGACAGATTTCTCACTCAAGATCAGCAGAGTGGAGACTGAGGATCTGGGAGTTTATTACTGCTTTCAAGCTTCACATGTTGTGGTGGACGTTCGGTGGAGGCACCAAGCTGGAAATCAAACGG	IGKV1-117*01	IGKJ1*01	6	93.6	97	96.1	100	96.3	90.9
110	L017	ND	Lung	IgA	ATGAAATGCAGCTGGGTCATCTTCTTCCTGATGGCAGTGGTTATAGGGGTCAATTCAGAGGTTCAGCTGCAGCAGTCTGGGGCAGAGCTTGTGAGTCCAGGGGCCTCAGTCAAATTGTCCTGCACAGCTTCTGGCTTCAACATTAAAGACAGCCTTATGCACTGGGTGAAGCAGAGGCCTGAACAGGGCCTGGAGTGGATTGGATGGATTGATCCTGAGGATGGTGAAACTAAATGTGCCCCGAAGTTCCAGGACAAGGCCGCTGTAACTGCAGACACATCCTCCAACACAGCCTACCTGCAGCTCAGCAGCCTGACATCTGAGGACACTGCCATCTATTACTGTACTCGCGATTACTACGATGGTAGCCCCTATGCTATGGACTACTGGGGTCAAGGA…	IGHV14-1*01	IGHD1-1*01,IGHD1-1*02	IGHJ4*01	15	97.3	83.3	98	95.8	93.9	100	ATGATGTCCTCTGCTCAGTTCCTTGGTCTCCTGTTGCTCTGTTTTCAAGGTACCAGATGTGATATCCAGATGACACAGACTACATCCTCCCTGTCTGCCTCTCTGGGAGACAGAGTCACCATCAGTTGCAGGGCAAGTCAGGATATTAGCAATTATTTAAACTGGTATCAGCAGAAACCAGATGGAACTGTTAAACTCCTGATCTACTACACATCAAGATTACACTCAGGAGTCCCATCAAGGTTCAGTGGCAGTGGGTCTGGGACAGATTATTCTCTCACCATCAGCAACCTGGAACCTGAAGATTTTGCCACTTACTATTGTCAGCACTATAGTAGCCTTCCGTGGACGTTCGGTGGAGGCACCAAGCTGGAAATCAAACGG	IGKV10-94*03,IGKV10-94*08	IGKJ1*01	4	100	100	100	100	96.3	95
111	L023	ND	Lung	IgA	ATGGCTGTCCTGGCGCTACTCCTCTGCCTGATGACTTTCCCAAGCTGTGCCCTGTCCCAGGTGCAGCTGAAGGAGTCAGGACCTGGCCTAGTGGCGCCCTCACAGAGCCTGTCCATCACATGCACTGTCTCTGGGTTCTCATTAACCAACTATGCTATAAGCTGGGTTCGCCAGCCACCAGGAAAGGGTCTGGAGTGGCTTGGAATAATCTGGACTGGTGGAGGCACAAATTATAATTCAGCTCTCAAATCCAGACTGAGCATCAGCAAAGACAACTCCAAGAGTCAAGTTTTCTTAAAAATGAACAGTCTGCAAACTGATGACACAGCCAGGTACTACTGTGCCAGATTCCCCTACTATACTTACTATAGTGACGGCGTGGAAGCTATGGACTACTGG…	IGHV2-9-1*01	IGHD2-12*01	IGHJ4*01	4	98.7	95.8	98	95.2	100	100	ATGAGTCCTGCCCAGTTCCTGTTTCTGCTAGTGCTCTGGATTCAGAAAACCAACGGTGATGTTGTGATGACCCAGACTCCACTCACTTTGTCTGTTACCATTGGACAGCCAGCTTCCATTTCTTGCAAGTCAAGTCAGAGCCTCTTATATAGTGATGGAAAAACCTATTTGAATTGGTTATTACAGAGTCCAGGCCAGTCTCCAAAGCTCCTAATCTATCTGGTGTCTAAACTGGAATCTGGAGTCCCTGACAGATTCAGTGGCAGTGGATCAGGGACAGATTTTACACTGAAAATCAGCAGAGTGGAGGCTGAGGATTTGGGAGTTTATTACTGCGTGCAAAGTACACATTTCCCTCGGACGTTCGGTGGAGGCACCAAGCTGGAAATCAAACG	IGKV1-133*01	IGKJ1*01	14	97.4	97	96.1	100	93.5	82.6
112	S311	ND	Spleen	IgG2	ATGAAATGCAGCTGGGTCATCTTCTTCCTGATGGCAGTGGTTATAGGGGTCAATTCAGAGGTTCAGCTGCAGCAGTCTGGGGCAGAGCTTGTGAGGCCAGGGGCCTCAGTCAAGTTGTCCTGCACAGCTTCTGGCTTCAACATTAAAGACAGCCTTATGCACTGGGTGAAGCAGAGGCCTGAACAGGGCCTGGAGTGGATTGGATGGATTGATCCTGAGGATGGTGAAACTAAATATGCCCCGAAGTTCCAGGGCAAGGCCACTGTAACTGCAGACACATCCTCCAACACAGCCTACCTGCAGCTCAGCAGCCTGACATCTGAGGACACTGCCATCTATTACTGTACTCGCGATTACTACGATGGTAGCCCCTATACTATGGACTACTGGGGTCAAGGA…	IGHV14-1*01	IGHD1-1*01,IGHD1-1*02	IGHJ4*01	10	100	83.3	98	95.8	96.5	100	ATGAGTGTGCCCACTCAGGTCCTGGGGTTGCTGCTGCTGTGGCTTACAGGTGCCAGATGTGACATCCAGATGACTCAGTCTCCAGCCTCCCTATCTGCATCTGTGGGAGAAACTGTCACCATCACATGTCGAGCAAGTGAGAATATTTACAGTTATTTAGCATGGTATCAGCAGAAACAGGGAAAATCTCCTCAGCTCCTGGTCTATAATGCAAAAACCTTAGCAGAAGGTGTGCCATCAAGGTTCAGTGGCAGTGGATCAGGCACACAGTTTTCTCTGAAGATCAACAGCCTGCAGCCTGAAGATTTTGGGAGTTATTACTGTCAACATCATTATGGTACTCCTCGGACGTTCGGTGGAGGCACCAAGCTGGAAATCAAACG	IGKV12-44*01	IGKJ1*01	0	100	100	100	100	100	100
113	S312	ND	Spleen	IgG	ATGACTGTTCTGGTGCTGTTCCTCTGCCTGGTTGCATTTCCAAGCTGTGTCCTGTCCCAGGTGCAGCTGAAGGAATCAGGACCTGTCCTGGTGGCGCCCTCACAGAGCCTGTCCATCACTTGCACTGTCTCTGGGTTTTCATTAACCAGCTATGGTGTACACTGGGTTCGCCAGCCTCCAGGAAAGGGTCTGGAGTGGCTGGGAGTAATTTGGGCTGGTGGAAGCACAAATTATAATTCAGCTCTCATGTCCAGACTGAGCATCAGCAAAGACAACTCCAAGAGCCAAGTTTTCTTAAAAGTGAACAGTCTGCAAACTGATGACACAGCCATGTACTACTGTGCCATCTACTATGGTAACTACGAGAAGGGTTTGGACTACTGGGGTCAAGGAACCTCA…	IGHV2-9*02	IGHD2-1*01,IGHD2-8*01	IGHJ4*01	5	97.3	100	100	95.2	98.2	100	ATGATGTCCTCTGCTCAGTTCCTTGGTCTCCTGTTGCTCTGTTTTCAAGGTACCAGATGTGATATCCAGATGACACAGACTACATCCTCCCTGTCTGCCTCTCTGGGAGACAGAGTCACCATCAGTTGCAGGGCAAGTCAGGATATTAGCAATTATTTAAACTGGTATCAGCAGAAACCAGATGGAACTGTTAAACTCCTGATCTACTATAGATCAAGATTACACTCAGGAGTCCCATCAAGGTTCAGTGGCAGTGGGTCTGGGACAGATTATTCTCTCACCATCAGCAACCTGGAACCTGAAGATATTGCCACTTACTATTGTCAGCAGTATAGTAAGCTTCCGTATACGTTCGGATCGGGGACCAAGCTGGAAATAAAACGG	IGKV10-94*03	IGKJ2*03	2	100	100	100	77.8	100	100
114	S318	ND	Spleen	IgG	ATGAAGTTGTGGCTGAACTGGATTTTCCTTTTAACACTTTTAAATGATGTCCAGTGTGAGGTGAAGCTGTTGGAATCTGGAGGAGGTTTGGTACAGCCGGGGGGTTCTCTGAGACTCTCCTGTGCAGCTTGTGGATTCACCTTCACTGATTTCTACATGAGCTGGATCCGCCAGCCTCCAGGGAAGGCACCTGAGTGGTTGGCTGTTGTTAAAAACAAAGGTTATGGTTATACAACAGAGTACAATCTATCTGTGAAGGGGCGGTTCACCATCTCCAGAGATAATACCCAAAACATCCTCTATCTTCAAATGAACACCCTGAGACCGGAGGACACTGCCATTTACTACTGTGCTATAACAACCTACTACTTTCCTTACTGGGGCCAAGGAGTCATGGTC…	IGHV7-4*04	IGHD1-3*01,IGHD6-1*01	IGHJ2*01	27	94.7	91.7	94.1	83.3	88.6	100	ATGGAATCACAGACTCTGGTCTTCATATCCATACTGCTCTGGTTATATGGTGCTGATGGGAACATTGTAATGACCCAATCTCCCAAATCCATGTCCATGTCAGTAGGAGAGAGGGTCACCTTGAGCTGCAAGGCCAATGACATTGTGGGTACTTATGTATCCTGGTATCAACAGAAACCAGAGCAGTCTCCTAAACTGCTGATATACGGGGCATCCAACCGGTACAGTGGGGTCCCCGATCGGTTCACAGGCAGTGGATCTGTAACAGATTTCACTCTGACCATCAGCAGTGTGCAGGCTGAAGACCTTGCAGATTATTACTGTGGACAGAGTTACAGCTATCCTCTCACGTTCGGTGCTGGGACCAAGCTGGAGCTGAAACGG	IGKV6-20*01	IGKJ5*01	7	98.7	88.9	100	100	96.3	100
115	S507	ND	Spleen	IgA	ATGGGATGGAACTGGATCTTTATTTTAATCCTGTCAGTAACTACAGGTGTCCACTCTGAGGTCCAGCTGCAGCAGTCTGGACCTGAGCTGGTGAAGCCTGGGGCTTCAGTGAAGATATCCTGCAAGGCTTCTGGTTACTCTTTCACTGACTACTACATGCACTGGGTGAAGCAAAGTCCTGAAAAGAGCCTTGAGTGGATTGGAGAGATTAATCCTAGCACTGGTGTCACTACCTACAACCAGAAGTTCAAGGCCAAGGCCACATTGACTGTAGACAAATCCTCCAGCACAGCCTACATGCAGCTCCAGAGCCTGACATCTGAGGACTCTGCAGTCTATTACTGTGCAAGATATGATAATAACCTTTATTACTATGCTATGGACTACTGGGGTCAAGGA…	IGHV1-42*01	IGHD2-3*01,IGHD2-4*01,IGHD2-9*02	IGHJ4*01	6	100	91.7	98	91.7	99.1	100	ATGGAGACAGAGACACTCCTGCTATGGGTGCTACTGCTCTGGGTTCCAGGTTCCACAGGTAAAATTGTGCTGACCCAATCTCCAGCTTCTTTGGCTGTGTCTCTAAGGCAGAGGGCCACCATATCCTGCAGAGCCAGTGAAAGTGTTGATAGTTATGGCAATAGTTTTATGCACTGGTACCAGCAGAAACCAGGACAGCCACCCAAACTCCTCATCTATCGTGCATCCAACCTAGAATCTGGGGTCCCTGCCAGGTTCAGTGGCAGTGGGTCTAGGACAGACTTCACCCTCACCATTGATCCTGTGGAGGCTGATGATGCTGCAACCTATTACTGTCAGCAGTGTTATGAGGATCCTCGGACGTTCGGTGGAGGCACCAAGCTGGAAATCAAGCGG	IGKV3-10*01	IGKJ1*01	7	97.4	100	100	88.9	100	81.8
116	S603	ND	Spleen	IgA	ATGTACTTGGGACTGAACTGTGTAATCATAGTTTTTCTCTTAAAAGGTGTCCAGAGTGAAGTGAAGCTTGAGGAGTCTGGAGGAGGCTTGGTGCAACCTGGAGGATCCATGAAACTCTCTTGTGCTGCTTCTGGATTCACTTTTAGTGATGCCTGGATGGCCTGGGTCCGCCAGTCTCCAGAGAAGGGGCTTGAGTGGATTGCTGAAATTAGAAACAAACTTAATAATCATGCAACATATTATGCTGAGTCTGTGAAAGGGAGGTTCACCATCTCAAGAGATGACTCCAAAAGTACACTTTACCTGCAAATGAACAACTTAAGAGCTGAAGACACTGGCATTTATTACTGTACCGGGAGGACTGGGTACTATGCTTTGGACTACTGGGGTCAAGGAACC…	IGHV6-6*01	IGHD4-1*01,IGHD4-1*02	IGHJ4*01	14	98.7	95.8	96.1	93.3	93.9	83.3	ATGGAATCACAGACTCTGGTCTTCATATCCATACTGCTCTGGTTATATGGTGCTGATGGAAACATTGTAATGACCCAATCTCCCAAATCCATGTCCATGTCAGTAGGAGAGAGGGTCACCTTGAGCTGCAAGGCCAGTGAGAATGTGGGTACTTATGTATCCTGGTATCAACAGAAACCAGACCAGTCTCCTAAACTACTGATATACGGGGCATCCAACCGGTACACTGGGGTCCCCGATCGCTTCACAGGCAGTGGATCTGCAACTGATTTCACTCTGACCATCAGCAGTGTGCAGGCTGAAGACCTTGCAGATTATTACTGTGGACAGAGTTACAGCTATCCGTATACGTTCGGATCGGGGACCAAGCTGGAAATAAAACGG	IGKV6-20*01	IGKJ2*03	4	100	100	96.1	100	98.1	100
117	S629	ND	Spleen	IgA	ATGGGATGGAACTGGATCTTTATTTTAATCCTGTCAGTAACTACAGGTGTCCACTCTGAGGTCCAGCTGCAGCAGTCTGGACCTGAGCTGGTGAAGCCTGGGGCTTCAGTGAAGATATCCTGCAAGGCTTCTGGTTACTCATTCACTGACTACTACATGCACTGGGTGAGGCAAAGTCCTGAAAAGAGCCTTGAGTGGATTGGAGAGATTAATCCTAGCACTGGTGGTACTACCTACAACCAGAAGTTCAAGGCCAAGGCCACATTGACTGTAGACAAATCCTCCAGCACAGCCTACATGCAGCTCCAGAGCCTGACATCTGAGGACTCTGCAGTCTATTACTGTGCAAGATATGATAGTAACCTTTATTACTATGCTATGGACTACTGGGGTCAAGGA…	IGHV1-42*01	IGHD2-5*01,IGHD2-6*01	IGHJ4*01	4	100	95.8	96.1	100	99.1	100	ATGGAGACAGAGACACTCCTGCTATGGGTGCTACTGCTCTGGGTTCCAGGTTCCACAGGTAAAATTGTGCTGACCCAATCTCCACCTTCTTTGGCTGTGTCTCTAAGGCAGAGGGCCACCATATCCTGCAGAGCCAGTGAAAGTGTTGATAGTTATGGCAGTAGTTTTATGCACTGGTACCAGCAGAAACCAGGACAGCCACCCAAACTCCTCATCTATCGTGCATCCAACCTAGAATCTGGGGTCCCTGCCAGGTTCAGTGGCAGTGGGTCTAGGACAGACTTCACCCTCACCATTGATCCTGTGGAGGCTGATGATGCTGCAACCTATTACTGTCAGCAGAATTATGACGATCCTCGGACGTTCGGTGGAGGCACCAAGCTGGAAATCAAGCGG	IGKV3-10*01	IGKJ1*01	8	96.2	96.7	100	88.9	100	86.4

## Sheet: No.2 mouse
	Clone No	Type	Group	Class	VH	VH germline	D germline	J germline	mismatch	FW1	CDR1	FW2	CDR2	FW3	CDR3	VK		J germline	mismatch	FW1	CDR1	FW2	CDR2	FW3	CDR3
1	N26	1	1	IgA	ATGGAATGGAGCAGAGTCTTTATCTTTCTCCTATCAGTAACTGCAGGTGTTCACTCCCAGGTCCAGCTGCTGCAGTCTGGAGCTGCGCTGGTAAGGCCTGGGACTTCAGTGAAGGTGTCCTGCAAGGCTTCTGGATACGCCTTCACTAATTTCTTGATAGAGTGGGTAAAGCAGAGGCCTGGACAGGGCCTTGAGTGGATTGGATTGACTAATCCTGGAAGTGGTGGTTCTAACTACAATGAGAAGTTCAAGGACAAGGCAACACTGACTACAGACAAATCCTCCAACACTGCCTACATGCAGCTCAGCAGCCTGACATCTGAGGACTCTGCGGTCTATTTCTGTGCAAGAAGACGGGACTGGGACGAGGGGTGGTTTGCTTACTGGGGCCAAGGGACT…	IGHV1-54*01	IGHD4-1*01,IGHD4-1*02	IGHJ3*01	9	97.3	95.8	98	91.7	97.4	100	ATGGATTTTCATGTGCAGATTTTCAGCTTCATGCTAATCAGTGTCACAGTCATATTGTCCAGTGGAGAAATTGTGCTCACCCAGTCTCCAGCACTCATGGCTGCATCTCCAGGGGAGAAGGTCACCATCACCTGCAGTGTCAGCTCAAGTATAAGTTCCAGCAACTTACACTGGTACCAGCAGAAGTCAGGAACCTCCCCCAAACCCTGGATTTATGGCACATCCAACCTTGCTTCTGGAGTCCCTGTTCGCTTCAGTGGCAGTGGATCTGGGACCTCTTATTCTCTCACAATCAGCAGCATGGAGGCTGAAGATGCTGCCACTTATTACTGTCAACAGTGGAGTAGTTACCCGCTCACGTTCGGTCCTGGGACCAAGCTGGAGCTGAAACGG	IGKV4-53*01	IGKJ5*01	4	100	100	96.1	100	99.1	96
2	N35	1	1	IgA	ATGGAATGGAGCAGAGTCTTTATCTTTCTCCTATCAGTTACTGCAGGTGTTCACTCCCAGGTCCAGCTGCAGCAGTCTGGAGCTGAGCTGGTAAGGCCTGGGACTTCAGTGAAGGTGTCCTGCAAGGCTTCTGGATACGCCTTCACTGATTACTTGATAGAGTGGGTAAAGCAGAGGCCTGGACAGGGCCTTGAGTGGATTGGACTGATTAATCCTGGAAGTGGTGGTCCTAACTACAATGAGAAGTTCAAGGGCAAGGCAACACTGACTGCAGACAAATCCTCCAGCACTGCCTACATGCTGCTCAGCAGCCTGACATCTGAGGACTCTGCGGTCTATTTCTGTGCAAGAAGACGGGACTGGGACGAGGGGTGGTTTGCTTACTGGGGCCAAGGGACT…	IGHV1-54*01	IGHD4-1*01,IGHD4-1*02	IGHJ3*01	4	100	95.8	98	95.8	99.1	100	ATGGATTTTCATGTGCAGATTTTCAGCTTCATGCTAATCAGTGTCACAGTCATATTGTCCAGTGGAGAATTTGTGCTCACCCAGTCTCCAGCACTCATGGCTGCATCTCCAGGGGAGAAGGTCACCATCACCTGCAGTGTCAGCTCAAGTATAAGTTCCAGCAACTTACACTGGTACCAGCAGAAGTCAGGGACCTCCCCCAAACCCTGGATTTTTGGCACATCCAACCTTGCTTCTGGAGTCCCTCTTCGCTTCAGTGGCAGTGGATCTGGGACCTCTTATTCTCTCACAATCAGCAGCATGGAGGCTGAAGATGCTGCCACTTATTACTGTCAACAGTGGAGTACTTACCCGCTCACGTTCGGTGCTGGGACCAAGCTAGAGCTGAAACGG	IGKV4-53*01	IGKJ5*01	9	98.7	100	92.2	100	98.1	92
3	N40	1	1	IgA	ATGGAATGGAGCAGAGTCTTTATCTTTCTCCTATCAGTTACTGCAGGTGTTCACTCCCAGGTCCAGCTGCAGCAGTCTGGAGCTGAGCTGGTAAGGCCTGGGACTTCAGTGAAGGTGTCCTGCAAGGCTTCTGGATACGCCTTCACTGATTACTTGATTGAGTGGGTAAAGCAGAGGCCTGGACAGGGCCTTGAGTGGATTGGACTGATTAATCCTGGAAGTGGTGGTCCTTACTACAATGAGAATTTCAAGGGCAAGTCAACACTGACTGCAGACAAATCCTCCAGCACTGCCTACATGCTGCTCAGCAGCCTGACATCTGAGGACTCTGCGGTCTATTTCTGTGCCAGAAGACGGGACTGGGACGAGGGGTGGTTTGTTTATTGGGGCCAAGGGACT…	IGHV1-54*01	IGHD4-1*01,IGHD4-1*02	IGHJ3*01,IGHJ3*02	9	100	95.8	96.1	95.8	96.5	83.3	ATGGATTTTCATGTGCAGATTTTCAGCTTCATGCTAATCAGTGTCACAGTCATATTGTCCAGTGGAGAAATTGTGCTCACCCAGTCTCCAGCACTCATGGCTGCATCTCCAGGGGAGAAGGTCACCATCACCTGCAGTGTCAGCTCAAGTATAAGTTCCAGCAACTTGCACTGGTACCAGCAGAAGTCAGGAACCTCCCCCAAACCCTGGATTTTTGGCACATCCAACCTTGCTTCTGGAGTCCCTCTTCGCTTCAGTGGCAGTGGATCTGGGACCTCTTATTCTCTCACAATCAGCAGCATGGAGGCTGAAGATGCTGCCACTTATTACTGTCAACAGTGGAGTAGTTACCCGCTCACGTTCGGTGCTGGGACCAAGCTGGAGCTGAAACGG	IGKV4-53*01	IGKJ5*01	5	100	100	96.1	100	98.1	96
4	N41	1	1	IgA	ATGGAATGGAGCAGAGTCTTTATCTTTCTCCTATCAGTAACTGCAGGTGTTCACTCCCAGGTCCAGGTGCTGCAGTCTGGAGCTGCGCTGGTAAGGCCTGGGACTTCAGTGAAGGTGTCCTGCAAGGCTTCTGGATACGCCTTCACTAATTACTTGATAGAGTGGGTAAAACAGAGGCCTGGACAGGGCCTTGAGTGGATTGGACTGACTAATCCTGGAAGTGGTGGTTCTAATTACAATGAAAAATTCAAGGACAAGGCAACACTGACTGCAGACAAATCCTCCAGCACTGCCTACATGCAGCTCAGCAGCCTGACATCTGAGGACTCTGCGGTCTATTTCTGTGCAAGAAGACGGGACTGGGACGAGGGGTGGTTTGCTTACTGGGGCCAAGGGACT…	IGHV1-54*01	IGHD4-1*01,IGHD4-1*02	IGHJ3*01	11	96	100	96.1	91.7	96.5	100	ATGGATTTTCATGTGCAGATTTTCAGCTTCATGCTAATCAGTGTCACAGTCATATTGTCCAGTGGAGAAATTATACTCACCCAGTCTCCAGCACTCATGGCTGCATCTCCAGGGGAGAAGGTCACCATCACCTGCAGTGTCAGCTCAAGTATAAGTTCCAGCAACTTACACTGGTACCAGCAGAAGTCAGGAACCTCCCCCAAACCCTGGATTTATGGCACATCCAACCTTGCTTCTGGAGTCCCTATTCGCTTCAGTGGCAGTGGATCTGGGACCTCTTATTCTCTCACAATCAGCAGCATGGAGGCTGAAGATGCTGCCACTTATTACTGTCAACAGTGGAGTAGTTACCCGCTCACGTTCGGTGCTGGGACCAAGCTGGAGCTGAAACGG	IGKV4-53*01	IGKJ5*01	7	97.4	100	96.1	100	98.1	96
5	N44	1	1	IgA	ATGGAATGGAGCAGAGTCTTTATCTTTCTCCTATCAGTAACTGCAGGTGTTCACTCCCAGGTCCAGGTGCTGCAGTCTGGAGCTGCGCTGGTAAGGCCTGGGACTTCAGTGAAGGTGTCCTGCAAGGCTTCTGGATACGCCTTCACTAATTACTTGATAGAGTGGGTAAAACAGAGGCCTGGACAGGGCCTTGAGTGGATTGGACTGACTAATCCTGGAAGTGGTGGTTCTAATTACAATGAAAAATTCAAGGACAAGGCAACACTGACTGCAGACAAATCCTCCAGCACTGCCTACATGCAGCTCAGCAGCCTGACATCTGAGGACTCTGCGGTCTATTTCTGTGCAAGAAGACGGGACTGGGACGAGGGGTGGTTTGCTTACTGGGGCCAAGGGACT…	IGHV1-54*01	IGHD4-1*01,IGHD4-1*02	IGHJ3*01	11	96	100	96.1	91.7	96.5	100	ATGGATTTTCATGTGCAGATTTTCAGCTTCATGCTAATCAGTGTCACAGTCATATTGTCCAGTGGAGAAATTATACTCACCCAGTCTCCAGCACTCATGGCTGCATCTCCAGGGGAGAAGGTCACCATCACCTGCAGTGTCAGCTCAAGTATAAGTTCCAGCAACTTACACTGGTACCAGCAGAAGTCAGGAACCTCCCCCAAACCCTGGATTTATGGCACATCCAACCTTGCTTCTGGAGTCCCTATTCGCTTCAGTGGCAGTGGATCTGGGACCTCTTATTCTCTCACAATCAGCAGCATGGAGGCTGAAGATGCTGCCACTTATTACTGTCAACAGTGGAGTAGTTACCCGCTCACGTTCGGTGCTGGGACCAAGTTGGAGCTGAAACGG	IGKV4-53*01	IGKJ5*01	7	97.4	100	96.1	100	98.1	96
6	N45	1	1	IgA	ATGGAATGGAGCAGAGTCTTTATCTTTCTCCTATCAGTAACTGCAGGTGTTCACTCCCAGGTCCAGCTGCTGCAGTCTGGAGCTGCGCTGGTAAGGCCTGGGACTTCAGTGAAGGTGTCCTGCAAGGCTTCTGGATACGCCTTCACTAATTTCTTGATAGAGTGGGTAAAGCAGAGGCCTGGACAGGGCCTTGAGTGGATTGGATTGATTAATCCTGGAAGTGGTGGTTCTAACTACAATGAGAAGTTCAAGGACAAGGCAACACTGACTGCAGACAAATCCTCCAGCACTGCCTACATGCAGCTCAGCAGCCTGACATCTGAGGACTCTGCGGTCTATTTCTGTGCAAGAAGACGGGACTGGGACGAGGGGTGGTTTGCTTACTGGGGCCAAGGGACT…	IGHV1-54*01	IGHD4-1*01,IGHD4-1*02	IGHJ3*01	6	97.3	95.8	98	95.8	99.1	100	ATGGATTTTCATGTGCAGATTTTCAGCTTCATGCTAATCAGTGTCACAGTCATATTGTCCAGTGGAGAAATTGTGCTCACCCAGTCTCCAGCACTCATGGCTGCATCTCCAGGGGAGAAGGTCACCATCACCTGCAGTGTCAGCTCAAGTATAAGTTCCAGCAACTTACACTGGTACCAGCAGAAGTCAGGAACCTCCCCCAAACCCTGGATTTATGGCACATCCAACCTTGCTTCTGGAGTCCCTGTTCGCTTCAGTGGCAGTGGATCTGGGACCTCTTATTCTCTCACAATCAGCAGCATGGAGGCTGAAGATGCTGCCACTTATTACTGTCAACAGTGGAGTAGTTACCCGCTCACGTTCGGTCCTGGGACCAAGCTGGAGCTGAAACGG	IGKV4-53*01	IGKJ5*01	4	100	100	96.1	100	99.1	96
7	S728	1	1	IgA	ATGGAATGGAGCAGAGTCTTTATCTTTCTCCTATCAGTAACTGCAGGTGTTCACTCCCAGGTCCAGCTGCTGCAGTCTGGAGCTGCGCTGGTAAGGCCTGGGACTTCAGTGAAGGTGTCCTGCAAGGCTTCTGGATACGCCTTCACTAATTTCTTGATAGAGTGGGTAAAGCAGAGGCCTGGACAGGGCCTTGAGTGGATTGGATTGATTAATCCTGGAAGTGGTGGTTCTAACTACAATGAGAAGTTCAAGGACAAGGCAACACTGACTGCAGACAAATCCTCCAGCACTGCCTACATGCAGCTCAGCAGCCTGACATCTGAGGACTCTGCGGTCTATTTCTGTGCAAGAAGACGGGACTGGGACGAGGGGTGGTTTGCTTACTGGGGCCAAGGGACT…	IGHV1-54*01	IGHD4-1*01,IGHD4-1*02	IGHJ3*01	6	97.3	95.8	98	95.8	99.1	100	ATGGATTTTCATGTGCAGATTTTCAGCTTCATGCTAATCAGTGTCACAGTCATATTGTCCAGTGGAGAAATTGTGCTCACCCAGTCTCCAGCACTCATGGCTGCATCTCCAGGGGAGAAGGTCACCATCACCTGCAGTGTCAGCTCAAGTATAAGTTCCAGCAACTTACACTGGTACCAGCAGAAGTCAGGAACCTCCCCCAAACCCTGGATTTATGGCACATCCAACCTTGCTTCTGGAGTCCCTGTTCGCTTCAGTGGCAGTGGATCTGGGACCTCTTATTCTCTCACAATCAGCAGCATGGAGGCTGAAGATGCTGCCACTTATTACTGTCAACAGTGGAGTAGTTACCCGCTCACGTTCGGTGCTGGGACCAAGCTGGAGCTGAAACGG	IGKV4-53*01	IGKJ5*01	4	100	100	96.1	100	99.1	96
8	N13	1	2	IgA	ATGGATTGGGTGTGGACCTTGCTATTCCTGATGGCAGCTGCCCAAAGGGCTCAAGCACAGATCCAGTTCGTGCAGTCTGGACCTGAGCTGAAGAAGCCTGGAGAGACAGTCAAGATCTCCTGCAAGGCTTCTGTGTATACCTTCACAGAATATCCAATGCACTGGGTGAAGCAGGCTCCAGGAAAGGGTTTCAAGTGGATGGGCTGGATACACACCTACTCTGGAGAGCCAACATATGCTGACGACTTCAAGGGACGGTTTGCCTTTTCTTTGGAAACCTCTGCCAGCACTGCCTATTTGCAGATCAACAACCTCAAAAATGAGGACACGGCTACATATTTCTGTGCAAGACTCCGTTTTTACTGGTACTTCGATGTCTGGGGCACAGGGACCACGGTC…	IGHV9-2*01	N/A	IGHJ1*03	1	100	100	100	95.8	100	100	ATGAAGTTGCCTGTTAGGCTGTTGGTGCTGATGTTCTGGATTCCTGCTTCCAGCAGTGATGTTGTGATGACCCAAACTCCACTCTCCCTGCCTGTCAGTCTTGGAGATCAAGCCTCCATCTCTTGCAGATCTAGTCAGAGCCTTGTACACAGTAATGGAAACACCTATTTACATTGGTACCTGCAGAAGCCAGGCCAGTCTCCAAAGGTCCTGATCTACAAAGTTTCCAACCGATTTTCTGGGGTCCCAGACAGGTTCAGTGGCAGTGGATCAGGGACAGATTTCACACTCAAGATCAGCAGAGTGGAGGCTGAGGATCTGGGAGTTTATTTCTGCTCTCAAAGTACACATGTTCCATTCACGTTCGGCTCGGGGACAAAGTTGGAAATAAAACGG	IGKV1-110*01	IGKJ4*01	1	100	100	98	100	100	100
9	S02G	1	2	IgG1	ATGGATTGGGTGTGGACCTTGCTATTCCTGATGGCAGCTGCCCAAAGGGCTCAAGCACAGATCCAGTTCGTGCAGTCTGGACCTGAGCTGAAGAAGCCTGGAGAGACAGTCAAGATCTCCTGCAAGGCTTCTGTGTATACCTTCACAGAATATCCAATGCACTGGGTGAAGCAGGCTCCAGGAAAGGGTTTCAAGTGGATGGGCTGGATACACACCTACTCTGGAGAGCCAACATATGCTGACGACTTCAAGGGACGGTTTGCCTTTTCTTTGGAAACCTCTGCCAGCACTGCCTATTTGCAGATCAACAACCTCAAAAATGAGGACACGGCTACATATTTCTGTGCAAGACTCCGTTTTTACTGGTACTTCGATGTCTGGGGCACAGGGACCACGGTC…	IGHV9-2*01	N/A	IGHJ1*03	1	100	100	100	95.8	100	100	ATGAAGTTGCCTGTTAGGCTGTTGGTGCTGATGTTCTGGATTCCTGCTTCCAGCAGTGATGTTGTGATGACCCAAACTCCACTCTCCCTGCCTGTCAGTCTTGGAGATCAAGCCTCCATCTCTTGCAGATCTAGTCAGAGCCTTGTACACAGTAATGGAAACACCTATTTACATTGGTACCTGCAGAAGCCAGGCCAGTCTCCAAAGGTCCTGATCTACAAAGTTTCCAACCGATTTTCTGGGGTCCCAGACAGGTTCAGTGGCAGTGGATCAGGGACAGATTTCACACTCAAGATCAGCAGAGTGGAGGCTGAGGATCTGGGAGTTTATTTCTGCTCTCAAAGTACACATGTTCCATTCACGTTCGGCTCGGGGACAAAGTTGGAAATAAACGG	IGKV1-110*01	IGKJ4*01	1	100	100	98	100	100	100
10	S36G	1	2	IgG2	ATGGATTGGGTGTGGACCTTGCTATTCCTGATGGCAGCTGCCCAAAGGGCTCAAGCACAGATCCAGTTCGTGCAGTCTGGACCTGAGCTGAAGAAGCCTGGAGAGACAGTCAAGATCTCCTGCAAGGCTTCTGTTTATACCTTCACAGAATATCCAATTCACTGGGTGAAGCAGGCTCCAGGAAAGGGTTTCAAGTGGATGGGCTGGATAAACACCTACTCTGGAGAGCCAACATATGCTGACGACTTCAAGGGACGGTTTGCCTTTTCTTTGGAAACCTCTGCCAGCACTGCCTATTTGCAGATCAACAACCTCAAAAATGAGGACACGGCTACATATTTCTGTGCAAGACTCCGTTTTTACTGGTACTTCGATGTCTGGGGCACAGGGACCACGGTC…	IGHV9-2*01	N/A	IGHJ1*03	2	100	95.8	98	100	100	100	ATGAAGTTGCCTGTTAGGCTGTTGGTGCTGATGTTCTGGATTCCTGCTTCCAGCAGTGAAAGCAGTGATGTTGTGATGACCCAAACTCCACTCTCCCTGCCTGTCAGTCTTGGAGATCAAGCCTCCATCTCTTGCAGATCTAGTCAGAGCCTTGTACACAGTAATGGAAACACCTATTTACATTGGTACCTGCAGAAGCCAGGCCAGTCTCCAAAGCTCCTGATCTACACAGTTTCCAACCGATTTTCTGGGGTCCCAGACAGGTTCAGTGGCAGTGGATCAGGGACAGATTTCACACTCAAGATCAGCAGAGTGGAGGCTGAGGATCTGGGAGTTTATTTCTGCTCTCAAAGTACACATGTTCCATTCACGTTCGGCTCGGGGACAAAGTTGGAAATA…	IGKV1-110*01	IGKJ4*01	1	100	100	100	88.9	100	100
11	S726	1	2	IgA	ATGGATTGGGTGTGGACCTTGCTATTCCTGATGGCAGCTGCCCAAAGGGCTCAAGCACAGATCCAGTTCGTGCAGTCTGGACCTGAGCTGAAGAAGCCTGGAGAGACAGTCAAGATCTCCTGCAAGGCTTCTGTTTATACCTTCACAGAATATCCAATTCACTGGGTGAAGCAGGCTCCAGGAAAGGGTTTCAAGTGGATGGGCTGGATAAACACCTACTCTGGAGAGCCAACATATGCTGACGACTTCAAGGGACGGTTTGCCTTTTCTTTGGAAACCTCTGCCAGCACTGCCTATTTGCAGATCAACAACCTCAAAAATGAGGACACGGCTACATATTTCTGTGCAAGACTCCGTTTTTACTGGTACTTCGATGTCTGGGGCACAGGGACCACGGTC…	IGHV9-2*01	N/A	IGHJ1*03	2	100	95.8	98	100	100	100	ATGAAGTTGCCTGTTAGGCTGTTGGTGCTGATGTTCTGGATTCCTGCTTCCAGCAGTGAAAGCAGTGATGTTGTGATGACCCAAACTCCACTCTCCCTGCCTGTCAGTCTTGGAGATCAAGCCTCCATCTCTTGCAGATCTAGTCAGAGCCTTGTACACAGTAATGGAAACACCTATTTACATTGGTACCTGCAGAAGCCAGGCCAGTCTCCAAAGCTCCTGATCTACACAGTTTCCAACCGATTTTCTGGGGTCCCAGACAGGTTCAGTGGCAGTGGATCAGGGACAGATTTCACACTCAAGATCAGCAGAGTGGAGGCTGAGGATCTGGGAGTTTATTTCTGCTCTCAAAGTACACATGTTCCATTCACGTTCGGCTCGGGGACAAAGTTGGAAATA…	IGKV1-110*01	IGKJ4*01	1	100	100	100	88.9	100	100
12	N29	3	3	IgA	ATGTACTTGGGACTGAACTGTGTAATCATAGTTTTTCTCTTAAAAGGTGTCCAGAGTGAAGTGCACCTTGAGGAGTCTGGAGGAGGCTTGGTGCAACCTGGAGGATCCATGAAACTCTCTTGTGCTGCTTCTGGATTCACTTTTAGTGCTGCCTGGATGGACTGGGTCCGCCAGTCTCCAGAGAAGGGGCTTGAGTGGGTTGCTGAGATTAGAAACACAGCTAATAATCATGCAACATATTATGCTGAGTCTGTGAAAGGGAGGTTCACCATCTCAAGAGATGATTCCAAAAGTAGAGTGTACCTGCAAATGAACAGCTTAAGAGCTGAAGACACTGGCATTTATTACTGTATCGGGATGAGTAACTACTATGCTATGGACTACTGGGGTCAAGGAACC…	IGHV6-6*01	IGHD2-5*01,IGHD2-6*01	IGHJ4*01	12	96	91.7	98	96.7	97.4	66.7	ATGCTCACTCAGCTCCTGGGATTACTGCTGCTCTGGTTTGCAGGTGGTAAATGTGACATTCAGATGACCCAGTCTCCTGCCTCCCAGTCTGCATCTCTGGGAGAAAGTGTCACCATCACATGCCTGGCAAGTCAGACCATTGGTACATGGTTAGCATGGTATCAGCAGAAACCAGGGAAATCTCCTCAGCTCCTGATTTATGCTGCAACCAGCTTGGCAGATGGGGTCCCATCAAGGTTCAGTGGTAGTGGATCTGGCACAAAATTTTCTTTCAAGATCAGCAGCCTACAGGCTGAAGATTTTGTAAGTTATTACTGTCAACAATTTTACAGTACTCCGTACACGTTCGGAGGGGGGACCAAGCTGGAAATAAAACGG	IGKV12-98*01	IGKJ2*01	1	100	100	100	100	100	95
13	N30	3	3	IgA	ATGTACTTGGGAGTGAACTGTGTAATCATAGTTTTTCTCTTAAAAGGTGTCCAGAGTGAAGTGCACCTTGAGGAGTCTGGAGGAGGCTTGGTGCAACCTGGAGGATCCATGAAACTCTCTTGTGCTGCTTCTGGATTCACTTTTAGTGCTGCCTGGATGGACTGGGTCCGCCAGTCTCCAGAGAAGGGGCTTGAGTGGGTTGCTGAGATTAGAAACACAGCTAATAATCATGCAACATATTATGCTGAGTCTGTGAAAGGGAGGTTCACCATCTCAAGAGATGATTCCAAAAGTAGAGTGTACCTGCAAATGAACAGCTTAAGAGCTGAAGACACTGGCATTTATTACTGTATCGGGATGAGTAACTACTATGCTATGGACTACTGGGGTCAAGGAACC…	IGHV6-6*01	IGHD2-5*01,IGHD2-6*01	IGHJ4*01	12	96	91.7	98	96.7	97.4	66.7	ATGCTCACTCAGCTCCTGGGATTACTGCTGCTCTGGTTTGCAGGTGGTAAATGTGACATTCAGATGACCCAGTCTCCTGCCTCCCAGTCTGCATCTCTGGGAGAAAGTGTCACCATCACATGCCTGGCAAGTCAGACCATTGGTACATGGTTAGCATGGTATCAGCAGAAACCAGGGAAATCTCCTCAGCTCCTGATTTATGCTGCAACCAGCTTGGCAGATGGGGTCCCATCAAGGTTCAGTGGTAGTGGATCTGGCACAAAATTTTCTTTCAAGATCAGCAGCCTACAGGCTGAAGATTTTGTAAGTTATTACTGTCAACAATTTTACAGTACTCCGTACACGTTCGGAGGGGGGACCAAGCTGGAAATAAAACGG	IGKV12-98*01	IGKJ2*01	1	100	100	100	100	100	95
14	N32	3	3	IgA	ATGTACTTGGGACTGAACTGTGTAATCATAGTTTTTCTCTTAAAAGGTGTCCAGAGTGAAGTGAAGCTTGAGGAGTCTGGAGGAGGCTTGGTGCAACCTGGAGGATCCATGAAACTCTCTTGTGCTGCTTCTGGATTCACTTTTAGTGATGCCTGGATGGACTGGGTCCGCCAGTCTCCAGAGAAGGGGCTTGAGTGGGTTGCTGAAATTAGAAACAAAGTTAATTATCATGCAACATCTTATGCTGAGTCTGTGAAAGGGAGGTTCACCATCTCAAGAGATGATTCCAAAAGTAGAGTGTTCCTGCAAATGAACAGCTTAAGAGCTGAAGACACTGGCATTTATTACTGTACCGGGATGAGTAACTACTATGCTATGGACTATTGGGGTCAAGGAACC…	IGHV6-6*01	IGHD2-5*01,IGHD2-6*01	IGHJ4*01	10	98.7	95.8	100	93.3	95.6	83.3	ATGCTCACTCAGCTCCTGGGATTACTGCTGCTCTGGTTTGCAGGTGGTAAATGTGACATTCAGATGACCCAGTCTCCTGCCTCCCAGTCTGCATCTCTGGGAGAAAGTGTCACCATCACATGCCTGGCAAGTCAGACCATTGGTACATGGTTAGCATGGTATCAGCAGAAACCAGGGAAATCTCCTCAGCTCCTGATTTTTGCTGCAACCAACTTGGCAGATGGGGTCCCATCAAGGTTCAGTGGTAGTGGATCTGGCACAAAATTTTCTTTCAAGATCAGCAGCCTACAGGCTGAAGATTTTGTGAGTTATTACTGTCAACAACTTTATAGTACTCCGTACACGTTCGGAGGGGGGACCAAACTGGAAATAAAACGG	IGKV12-98*01	IGKJ2*01	4	100	100	98	100	98.1	95
15	N33	3	3	IgA	ATGTACTTGGGACTGAACTGTGTAATCATAGTTTTTCTCTTAAAAGGTGTCCAGAGTGAAGTGAAGCTTGAGGAGTCTGGAGGAGGCTTGGTGCAACCTGGAGGATCCATGAAACTCTCTTGTGCTGCTTCTGGATTCACTTTTAGTGATGCCTGGATGGACTGGGTCCGCCAGTCTCCAGAGAAGGGGCTTGAGTGGGTTGCTGAAATTAGAAACAAACTTAGTAATCATGAAATATATTATGCTGAGTCTGTGAAAGGGAGGTTCACCATCTCAAGAGATGATTCCAAAAGTAAAATGTACCTGCAAATGAACAGCTTAAGAGCTGAAGACACTGGCATTTATTACTGTACCGGGATGAATAACTACTATACTATGGACTACTGGGGTCAAGGAACC…	IGHV6-6*01	IGHD1-3*01,IGHD5-2*01,IGHD5-3*01	IGHJ4*01	13	98.7	95.8	100	83.3	95.6	83.3	ATGCTCACTCAGCTCCTGGGATTACTGCTGCTCTGGTTTGCAGGTGGTAAATGTGACATTCAGATGACCCAGTCTCCTGCCTCCCAGTCTGCATCTCTGGGAGAAAGTGTCACCATCACATGCCTGGCAAGTCAGACCATTGGTACATGGTTAGCATGGTATCAGCAGAAACCAGGGAAATCTCCTCAGCTCCTGATTTATGCTGCAACCAGCTTGGCAGATGGGGTCCCATCAAGGTTCAGTGGTAGTGGATCTGGCACAAAATTTTCTTTCAAGATCAGCAGCCTACAGGCTGAAGATTTTGTAAGTTATTACTGTCAACAACTTTACAGTACTCCGTACACGTTCGGAGGGGGGACCAAGCTGGAAATAAAACGG	IGKV12-98*01	IGKJ2*01	0	100	100	100	100	100	100
16	N39	3	3	IgA	ATGTACTTGGGACTGAACTGTGTAATCATAGTTTTTCTCTTAAAAGGTGTCCAGAGTGAAGTGAAGCTTGAGGAGTCTGGAGGAGGCTTGGTGCAACCTGGAGGATCCATGAAACTCTCTTGTGCTGCTTCTGGATTCACTTTTAGTGATGCCTGGATGGACTGGGTCCGCCAGTCTCCAGAGAAGGGGCTTGAGTGGGTTGCTGAAATTAGAAACAAACTTAGTAATCATGAAATATATTATGCTGAGTCTGTGAAAGGGAGGTTCACCATCTCAAGAGATGATTCCAAAAGTAAAATGTACCTGCAAATGAACAGCTTAAGAGCTGAAGACACTGGCATTTATTACTGTACCGGGATGAATAACTACTATACTATGGACTACTGGGGTCAAGGAACC…	IGHV6-6*01	IGHD1-3*01,IGHD5-2*01,IGHD5-3*01	IGHJ4*01	13	98.7	95.8	100	83.3	95.6	83.3	ATGCTCACTCAGCTCCTGGGATTACTGCTGCTCTGGTTTGCAGGTGGTAAATGTGACATTCAGATGACCCAGTCTCCTGCCTCCCAGTCTGCATCTCTGGGAGAAAGTGTCACCATCACATGCCTGGCAAGTCAGACCATTGGTACATGGTTAGCATGGTATCAGCAGAAACCAGGGAAATCTCCTCAGCTCCTGATTTATGCTGCAACCAGCTTGGCAGATGGGGTCCCATCAAGGTTCAGTGGTAGTGGATCTGGCACAAAATTTTCTTTCAAGATCAGCAGCCTACAGGCTGAAGATTTTGTAAGTTATTACTGTCAACAACTTTACAGTACTCCGTACACGTTCGGAGGGGGGACCAAGCTGGAAATAAAACGG	IGKV12-98*01	IGKJ2*01	0	100	100	100	100	100	100
17	S23G	3	3	IgG1	ATGTACTTGGGACTGAACTGTGTAATCATAGTTTTTCTCTTAAAAGGTGTCCAGAGTGAAGTGAAGCTTGAGGAGTCTGGAGGAGGCTTGGTGCAACCTGGAGGATCCATGAAACTCTCTTGTGCTGCTTCTGGATTCACTTTTAGTGATGCCTGGATGGACTGGGTCCGCCAGTCTCCAGAGAAGGGGCTTGAGTGGGTTGCTGAAATTAGAAACAAACCTAATAATCATGCAACAGATTATGCTGAGTCTGTGAAAGGGAGGTTCACCATCTCAAGAGATGATTCCAAAAGTAGAGTGTACCTGCAAATGAACAGCTTAAGAGCTGAAGACACTGGCATTTATTACTGTACCGGGATGAGTAACTACTATGCTATGGACTACTGGGGTCAAGGAACC…	IGHV6-6*01	IGHD2-5*01,IGHD2-6*01	IGHJ4*01	8	98.7	95.8	100	96.7	96.5	83.3	ATGCTCACTCAGCTCCTGGGATTACTGCTGCTCTGGTTTGCAGGTGGTAAATGTGACATTCAGATGACCCAGTCTCCTGCCTCCCAGTCTGCATCTCTGGGAGAAAGTGTCACCATCACATGCCTGGCAAGTCAGACCATTGGTACATGGTTAGCATGGTATCAGCAGAAACCAGGGAAATCTCCTCAGCTCCTGATTTATGCTGCAACCAGCTTGGCAGATGGGGTCCCATCAAGGTTCAGTGGTAGTGGATCTGGCACAAAATTTTCTTTCAAGATCAGCAGCCTACAGGCTGAAGATTTTGTAAGTTATTACTGTCAACAATTTTACAGTACTCCGTACACGTTCGGAGGGGGGACCAAGCTGGAAATAAAACGG	IGKV12-98*01	IGKJ2*01	1	100	100	100	100	100	95
18	S745	3	3	IgA	ATGTACTTGGGACTGAACTGTGTAATCATAGTTTTTCTCTTAAAAGGTGTCCAGAGTGAAGTGAAGCTTGAGGAGTCTGGAGGAGGCTTGGTGCAACCTGGAGGATCCATGAAACTCTCTTGTGCTGCTTCTGGATTCACTTTTAGTGATGCCTGGATGGACTGGGTCCGCCAGTCTCCAGAGAAGGGGCTTGAGTGGGTTGCTGAAATTAGAAACAAACTTAGTAATCATGAAATATATTATGCTGAGTCTGTGAAAGGGAGGTTCACCATCTCAAGAGATGATTCCAAAAGTAAAATGTACCTGCAAATGAACAGCTTAAGAGCTGAAGACACTGGCATTTATTACTGTACCGGGATGAATAACTACTATACTATGGACTACTGGGGTCAAGGAACC…	IGHV6-6*01	IGHD1-3*01,IGHD5-2*01,IGHD5-3*01	IGHJ4*01	13	98.7	95.8	100	83.3	95.6	83.3	ATGCTCACTCAGCTCCTGGGATTACTGCTGCTCTGGTTTGCAGGTGGTAAATGTGACATTCAGATGACCCAGTCTCCTGCCTCCCAGTCTGCATCTCTGGGAGAAAGTGTCACCATCACATGCCTGGCAAGTCAGACCATTGGTACATGGTTAGCATGGTATCAGCAGAAACCAGGGAAATCTCCTCAGCTCCTGATTTATGCTGCAACCAGCTTGGCAGATGGGGTCCCATCAAGGTTCAGTGGTAGTGGATCTGGCACAAAATTTTCTTTCAAGATCAGCAGCCTACAGGCTGAAGATTTTGTAAGTTATTACTGTCAACAACTTTACAGTACTCCGTACACGTTCGGAGGGGGGACCAAGCTGGAAATAAAACGG	IGKV12-98*01	IGKJ2*01	0	100	100	100	100	100	100
19	N48	3	4	IgA	ATGGATTTTGGGCTGATTTTTTTTATTGTTGCTCTTTTAAAAGGGGTCCAGTGTGAGGTGAAGCTTCTCCAGTCTGGAGGTGGCCTGGTGCAGCCTGGAGGATCCCTGAAACTCTCCTGTGCAGCCTCAGGAATCGATTTTAGTAGATACTGGATGAGTTGGGTTCGGCGGGCTCCAGGGAAAGGACTAGAATGGATTGGAGAAATTAATCCAGATAGCAGTACAATAAACTATGCACCATCTCTAAAGGATAAATTCATCATCTCCAGAGACAACGCCAAAAATACGCTGTACCTGCAAATGAGCAAAGTGAGATCTGAGGACACAGCCCTTTATTACTGTGCAAGACAGGATATTTACGGTAGTAGCTACTTTGACTACTGGGGCCAAGGCACCACT…	IGHV4-1*01	IGHD1-1*01	IGHJ2*01	0	100	100	100	100	100	100	ATGAAGTCACAGACCCAGGTCTTCATATTTCTACTGCTCTGTGTGTCTGGTGCTCATGGGAGTATTGTGATGACCCAGACTCCCAAATTCCTGCCTGTATCAGCAGGAGACAGGGTTACCATGACCTGCAAGGCCAGTCAGAGTGTGGGTAATAATGTAGCCTGGTACCAACAGAAGCCAGGACAGTCTCCTAAACTGCTGATATACTATGCATCCAATCGCTACACTGGAGTCCCTGATCGCTTCACTGGCAGTGGATCTCGGACAGATTTCACTTTCACCATCAGCAGTGTGCAGGTTGAAGACCTGGCAGTTTATTTCTGTCAGCAGCATTATACCTCTCCGTATACGTTCGGATCGGGGACCAAGCTGGAAATAAAACGG	IGKV3-15*01	IGKJ2*03	2	100	100	100	100	99.1	95
20	S42G	3	4	IgG1	ATGGATTTTGGGCTGATTTTTTTTATTGTTGCTCTTTTAAAAGGGGTCCAGTGTGAGGTGAAGCTTCTCCAGTCTGGAGGTGGCCTGGTGCAGCCTGGAGGATCCCTGAAACTCTCCTGTGCAGCCTCAGGAATCGATTTTAGTAGATACTGGATGAGTTGGGTTCGGCGGGCTCCAGGGAAAGGACTAGAATGGATTGGAGAAATTAATCCAGATAGCAGTACAATAAACTATGCACCATCTCTAAAGGATAAATTCATCATCTCCAGAGACAACGCCAAAAATACGCTGTACCTGCAAATGAGCAAAGTGAGATCTGAGGACACAGCCCTTTATTACTGTGCAAGACAGGATATTTACGGTAGTAGCTACTTTGACTACTGGGGCCAAGGCACCACT…	IGHV4-1*01	IGHD1-1*01	IGHJ2*01	0	100	100	100	100	100	100	ATGAAGTCACAGACCCAGGTCTTCATATTTCTACTGCTCTGTGTGTCTGGTGCTCATGGGAGTATTGTGATGACCCAGACTCCCAAATTCCTGCCTGTATCAGCAGGAGACAGGGTTACCATGACCTGCAAGGCCAGTCAGAGTGTGGGTAATAATGTAGCCTGGTACCAACAGAAGCCAGGACAGTCTCCTAAACTGCTGATATACTATGCATCCAATCGCTACACTGGAGTCCCTGATCGCTTCACTGGCAGTGGATCTCGGACAGATTTCACTTTCACCATCAGCAGTGTGCAGGTTGAAGACCTGGCAGTTTATTTCTGTCAGCAGCATTATACCTCTCCGTATACGTTCGGATGGGGGACCAAGCTGGAAATAAAACGG	IGKV6-b*01	IGKJ2*03	2	100	100	100	100	99.1	95
21	S729	3	4	IgA	ATGGATTTTGGGCTGATTTTTTTTATTGTTGCTCTTTTAAAAGGGGTCCAGTGTGAGGTGAAGCTTCTCCAGTCTGGAGGTGGCCTGGTGCAGCCTGGAGGATCCCTGAAACTCTCCTGTGCAGCCTCAGGAATCGATTTTAGTAGATACTGGATGAGTTGGGTTCGGCGGGCTCCAGGGAAAGGACTAGAATGGATTGGAGAAATTAATCCAGATAGCAGTACAATAAACTATGCACCATCTCTAAAGGATAAATTCATCATCTCCAGAGACAACGCCAAAAATACGCTGTACCTGCAAATGAGCAAAGTGAGATCTGAGGACACAGCCCTTTATTACTGTGCAAGACAGGATATTTACGGTAGTAGCTACTTTGACTACTGGGGCCAAGGCACCACT…	IGHV4-1*01	IGHD1-1*01	IGHJ2*01	0	100	100	100	100	100	100	ATGAAGTCACAGACCCAGGTCTTCATATTTCTACTGCTCTGTGTGTCTGGTGCTCATGGGAGTATTGTGATGACCCAGACTCCCAAATTCCTGCCTGTATCAGCAGGAGACAGGGTTACCATGACCTGCAAGGCCAGTCAGAGTGTGGGTAATAATGTAGCCTGGTACCAACAGAAGCCAGGACAGTCTCCTAAACTGCTGATATACTATGCATCCAATCGCTACACTGGAGTCCCTGATCGCTTCACTGGCAGTGGATCTGGGACAGATTTCACTTTCACCATCAGCAGTGTGCAGGTTGAAGACCTGGCAGTTTATTTCTGTCAGCAGCATTATAGCTCTCCGTATACGTTCGGATCGGGGACCAAGCTGGAAATAAAACGG	IGKV6-b*01	IGKJ2*03	0	97.4	97.2	94.1	100	95.4	76.9
22	N42	3	5	IgA	ATGGCTGTCCTGGCGCTACTCCTCTGCCTGATGACTTTCCCAAGCTGTGCCCTGTCCCAGGTGCAGCTGAAGGAGTCAGGACCTGGCCTGGTGGCGCCCTCACAGAGCCTGTCCATCACATGCACTGTCTCTGGGTTCTCATTAACCAGCTATGCTATAAGCTGGGTTCGCCAGCCACCAGGAAAGGGTCTGGAGTGGCTTGGAGTAATATGGACTGGTGGAGGCACAAATTATAATTCAGCTCTCAAATCCAGACTGAGCATCAGCAAAGACAACTCCAAGAGTCAAGTTTTCTTAAAAATGAACAGTCTGCAAACTGATGACACAGCCAGGTACTACTGTGCCAGATTCCCCTATTACTACGATGGTAGCTACTACTTTGACTACTGGGGCCAAGGC…	IGHV2-9-1*01	IGHD1-1*01,IGHD1-1*02	IGHJ2*01	0	100	100	100	100	100	100	ATGGATTCACAGGCCCAGGTTCTTATGTTGCTGCTGCTATGGGTATCTGGTACCTGTGGGGACATTGTGATGTCACAGTCTCCATCCGCCCTAGCTGTGTCAGTTGGAGAGAAGGTCACTATGAGCTGCAAGTCCAGTCAGAGCCTTTTATATAGTAGCAATCAAACGAACTACTTGGCCTGGTACCAGCAGAAACCAGGGCAGTCTCCTAAACTGTTAATCTACTGGGCATCCACTAGGGAATCTGGGGTCCCTGACCGCTTCACAGGCAGTGGATCAGGGACAGATTTCACTCTCACCATCAGCAGTGTGCAGGCTGAAGACCTGGCCGTTTATTACTGCAAACAATCTTATAATCTTGGACGTTCGGTGGAGGCACCGAGCTGGA	IGKV8-30*01	IGKJ1*01	14	100	96.7	100	100	98.1	100
23	N43	3	5	IgA	ATGAAATTCAGCTGGGTCATCTTCTTCCTGATGGCAGTGGTTACAGGGGTCAGTTCAGAGGTTCAGCTGCAGCAGTCTGGGGCTGAGCTTGTGAGGCCAGGGGCCTCAGTCAAGTTGTCCTGCACAGCTTCTGGCTTTAACATTAGAGACGACTATATGCACTGGGTGAAGCAGAGGCCTGAACAGGGCCTGGAGTGGATTGGAAGGATTGATCCTGCGAATGGTAATACTAAATATGCCCCGAAGTTCCAGGACAAGGCCACTATAACTGCAGACACATCCTCCAACACAGCCTACCTGCAGCTCAGCAGCCTGACATCTGAGGACACTGCCGTCTATTACTGTGCTAGAATGGACTATGATGCTTACTACCTCTATGGTATGGACTACTGGGGTCAA…	IGHV14-3*01	IGHD2-3*01	IGHJ4*01	9	97.3	79.2	100	100	98.2	100	ATGGATTCACAGGCCCAGGTTCTTATGTTGCTGCTGCTATGGGTATCTGGTACCTGTGGGGACATTGTGATGTCACAGTCTCCATCCGCCCTAGCTGTGTCAGTTGGAGAGAAGGTCACTATGAGCTGCAAGTCCAGTCAGAGCCTTTTATATAGTAGCAATCAAACGAACTACTTGGCCTGGTACCAGCAGAAACCAGGGCAGTCTCCTAAACTGTTAATCTACTGGGCATCCACTAGGGAATCTGGGGTCCCTGACCGCTTCACAGGCAGTGGATCAGGGACAGATTTCACTCTCACCATCAGCAGTGTGCAGGCTGAAGACCTGGCCGTTTATTACTGCAAACAATCTTATAATCTTGGACGTTCGGTGGAGGCACCGAGCTGGAAattcaaacgg	IGKV8-30*01	IGKJ1*01	14	100	100	98	100	100	100
24	N20	3	6	IgA	ATGGGATGGAGCTGTATCATCCTCTTTTTGGTAGCAGCAGCTACAGGTGTCCACTCCCAGGTCCAACTGCAGCAGCCGGGTGCTGAGCTTGTGAAGCCTGGGGCCTCAGTGAAGCTGTCCTGCAAGGCATCTGGCTACACTTTCACCAGCTACTGGATAAACTGGGTGAAGCAGAGGCCTGGACAAGGCCTTGAGTGGATTGGAAATATTAATCCTGGTAGTAGTAGTACTAACTACAATGAGAAGTTCAAGAGCAAGGCCACACTGACTGTAGAAACATCCTCCAGCCCAGCCTACATGCAGATCAGCAGCCTGACTTCTGACGACTCTGCGGTCTATTATTGCGCAAGATCAGTGATTAGTAACTACTACTTTGACTACTGGGGCCAAGGCACCACT…	IGHV1S61*01	IGHD2-5*01,IGHD2-6*01	IGHJ2*01	8	97.3	100	100	95.8	95.6	100	ATGGTGCCCACTTCTCAGCTCCTTGGATTTTTGCTTTTCTGGACTTCAGCCTCCAGATGTGACATTCTGATGACTCAGTCTCCAGCCACCCTGTCTGTGACTCCAGGAGATAGGGTCTCTCTTTCCTGCAGGGCCAGTCAGAGTATTAGGGACTACTTACACTGGTATCAACAAAAATCACATGAGTCTCCAAGGCTTCTCATCAAGTATGCTTCCCAATCCATCTCTGGGATCCCCTCCAGGTTCAGTGGCAGTGGATCAGGGTCAGATTTCACTCTCACTATCAACAGTGTGGAACCTGAAGATGTTGGAGTGTATTACTGTCAAAATGGTCACAGTTTTCCGCTCACGTTCGGTGCTGGGACCAAGCTGGAGCTGAAACGG	IGKV5-39*01	IGKJ5*01	7	100	93.3	98	100	99.1	100
25	N38	3	7	IgA	ATGGGCAGGCTTACTTCTTCATTCCTGCTACTGATTGTCCCTGCATATGTCCTGTCCCAGGTCACTCTGAAAGAGTCTGGCCCTGGGATATTGCAGCCCTCCCAGACCCTCAGTCTGACTTGTTCTTACTCTGGGTTTTCACTGAGCACTTATGGTATGGGTGTAGGTTGGATTCGTCAGCCTTCAGGGAAGGGTCTGGAGTGGCTGGCCAACATTTGGTGGAATGGTGATAAGTACTATAACTCAGCCCTGAAGAGCCGGCTCACAATCTCCAAGGATACCTCCAACAATCAGGTATTCCTCAAGATCTCCAGTGTGGACACTGCAGATACTGCCACATACTACTGTGCTCAAATTGCTGGGGCCTTCTATAGTGACTTTGACTCCTGGGGCCAAGGC…	IGHV8-5*01	IGHD2-12*01,IGHD2-5*01,IGHD2-6*01	IGHJ2*01	15	97.3	90	90.2	95.2	96.5	100	ATGGAGACAGACACAATCCTGCTATGGGTGCTGCTGCTCTGGGTTCCAGGCTCCACTGGTGACATTGTGCTGACCCAATCTCCAGCTTCTTTGGCTGTGTCTCTAGGGCAGAGGGCCACCATCTCCTGCAAGGCCAGCCAAAGTGTTGATTCTGATGGTGATAGTTATATGAACTGGTACCAACAGAAACCAGGACAGCCACCCAAACTCCTCATCTATGCTGCATCCAATCTAGAGTCTGGGATCCCAGCCAGGTTTAGTGGCAGTGGGTCTGCGACAGACTTCACCCTCAACATCCATCCTGTGGAGGAGGAGGATGCTGCAACCTATTACTGTCAGCAAAGTAATGAGGATCCTTGGACGTTCGGTGGAGGCACCAAGCTAGAAATCAAACGG	IGKV3-4*01	IGKJ1*01	3	100	96.7	100	100	99.1	100
26	S733	3	7	IgA	ATGGGCAGGCTTACTTCTTCATTCCTGCTACTGATTGTCCCTGCATATGTCCTGTCCCAGGTCACTCTGAAAGAGTCTGGTCCTGGGATATTGCAGCCCTCCCAGACCCTCAGTCTGACTTGTTCTTTCTCTGGGTTTTCACTGAGCACTTATGGTATGGGTGTAGGTTGGATTCGTCAGCCTTCAGGGAAGGGTCTGGAGTGGCTGGCCAACATTTGGTGGAATGATGATAAGTATTATAAATCAAACCTGAGGAGCCGGCTCTCAATCTCCAAGGATACCTCCAACAACCAGGTATTCCTCAAGATCTCCAGTGTGGAGACTGCAGATACTGGCACATACTACTGTGCGCAAATAGGTGGGGCCTACTATAGTGACTTTGACCACTGGGGCCAAGGC…	IGHV8-5*01	IGHD2-12*01,IGHD2-5*01,IGHD2-6*01	IGHJ2*01	21	97.3	90	90.2	100	91.2	90	ATGGAGACAGACACAATCCTGCTATGGGTGCTGCTGCTCTGGGTTCCAGGCTCCACTGGTGACATTGTGCTGACCCAATCTCCAGCTTCTTTGGCTGTGTCTCTAGGGCAGAGGGCCACCATCTCCTGCAAGGCCAGCCAAAGTGTTGATTATGATGGTGATAGTTATATGAACTGGTACCAACAGAAAGCAGGACAGCCACCCAAACTCCTCATCTATGCTGCATCCAATCTAGAATCTGGGATCCCAGCCAGGTTTAGTGGCAGTGGGTCTGGGACAGACTTCACCCTCAACATCCATCCTGTGGAGGAGGAGGATGCTGCAACCTATTACTGTCAGCAAAGTAATGAGGATCCTTGGACGTTCGGTGGCGGCACCAAGCTGGAAATCAAACGG	IGKV3-4*01	IGKJ1*01	1	98.7	100	100	100	99.1	95
27	S736	3	7	IgA	ATGGGCAGGCTTACTTCTTCATTCCTGCTACTGATTGTCCCTGCATATGTCCTGTCCCAGGTCACTCTGAAAGAGTCTGGTCCTGGGATATTGCAGCCCTCCCAGACCCTCAGTCTGACTTGTTCTTTCTCTGGGTTTTCACTGAGCACTTATGGTATGGGTGTAGGTTGGATTCGTCAGCCTTCAGGGAAGGGTCTGGAGTGGCTGGCCAACATTTGGTGGAATGATGATAAGTATTATAAATCAAACCTGAGGAGCCGGCTCTCAATCTCCAAGGATACCTCCAACAACCAGGTATTCCTCAAGATCTCCAGTGTGGAGACTGCAGATACTGGCACATACTACTGTGCGCAAATAGGTGGGGCCTACTATAGTGACTTTGACCACTGGGGCCAAGGC…	IGHV8-5*01	IGHD2-12*01,IGHD2-5*01,IGHD2-6*01	IGHJ2*01	21	97.3	90	90.2	100	91.2	90	ATGGAGACAGACACAATCCTGCTATGGGTGCTGCTGCTCTGGGTTCCAGGCTCCACTGGTGACATTGTGCTGACCCAATCTCCAGCTTCTTTGGCTGTGTCTCTAGGGCAGAGGGCCACCATCTCCTGCAAGGCCAGCCAAAGTGTTGATTATGATGGTGATAGTTATATGAACTGGTACCAACAGAAAGCAGGACAGCCACCCAAACTCCTCATCTATGCTGCATCCAATCTAGAATCTGGGATCCCAGCCAGGTTTAGTGGCAGTGGGTCTGGGACAGACTTCACCCTCAACATCCATCCTGTGGAGGAGGAGGATGCTGCAACCTATTACTGTCAGCAAAGTAATGAGGATCCTTGGACGTTCGGTGGCGGCACCAAGCTGGAAATCAAACGG	IGKV3-4*01	IGKJ1*01	1	94.9	94.4	96.1	100	99.1	95
28	S737	3	7	IgA	ATGGGCAGGCTTACTTCTTCATTCCTGCTACTGATTGTCCCTGCATATGTCCTGTCCCAGGTCACTCTGAAAGAGTCTGGCCCTGGGATATTGCAGCCCTCCCAGACCCTCAGTCTGACTTGTTCTTTCTCTGGGTTTTCACTGAGCACTTATGGTATGGGTGTAGGTTGGATTCGTCAGCCTTCAGGGAAGGGTCTGGAGTGGCTGGCCAACATTTGGTGGAATGATGATAAATACTATAAGTCAGCCCTGAAGAGCCGGCTCACAATCTCCAAGGATACCTCCAACAACCAGGTATTCCTCAAGATCTCCAGTGTGGACACTGCAGATACTGCCACATACTACTGTGCTCAAATAGGTGGGGCCTACTATAGTGACTTTGACTACTGGGGCCAAGGC…	IGHV8-5*01	IGHD2-12*01,IGHD2-5*01,IGHD2-6*01	IGHJ2*01,IGHJ2*02	14	98.7	90	90.2	95.2	96.5	100	ATGGAGACAGACACAATCCTGCTATGGGTGCTGCTGCTCTGGGTTCCAGGCTCCACTGGTGACATTGTGCTGACCCAATCTCCAGCTTCTTTGGCTGTGTCTCTAGGGCAGAGGGCCACCATCTCCTGCAAGGCCAGCCAGAGTGTTGATTCTGATGGTGATAGTTATTTGAACTGGTACCAACAGAAACCAGGACAGCCACCCAAACTCCTCATCTATGCTGCATCCAATCTAGGATCTGGGATCCCAGCCAGGTTTAGTGGCAGTGGGTCTGGGACAGACTTCACCCTCAACATCCATCCTGTGGAGGAGGAGGATGCTGCAACCTATTACTGTCAGCAAAGTAATGAGGATCCTTGGACGTTCGGTGGAGGCACCAAGCTGGAAATCAGACGG	IGKV3-4*01	IGKJ1*01	4	100	100	100	100	100	100
29	S743	3	7	IgA	ATGGGCAGGCTTACTTCTTCATTCCTGCTACTGATTGTCCCTGCATATGTCCTGTCCCAGGTCACTCTGAAAGAGTCTGGCCCTGGGATATTGCAGCCCTCCCAGACCCTCAGTCTGACTTGTTCTTTCTCTGGGTTTTCACTGAGCACTTATGGTATGGGTGTAGGTTGGATTCGTCAGCCTTCAGGGAAGGGTCTGGAGTGGCTGGCCAACATTTGGTGGAATGATGATAAGTACTATAACTCAGCCCTGAAGAGCCGGCTCACAATCTCCAAGGATACCTCCAACAATCAGGTATTCCTCAAGATCTCCAGTGTGGACACTGCAGATACTGCCACATACTACTGTGCTCAAATTGCTGGGGCCTACTATAGTGACTTTGACTCCTGGGGCCAAGGC…	IGHV8-5*01	IGHD2-12*01,IGHD2-5*01,IGHD2-6*01	IGHJ2*01	13	98.7	90	90.2	100	96.5	100	ATGGAGACAGACACAATCCTGCTATGGGTGCTGCTGCTCTGGGTTCCAGGCTCCACTGGTGACATTGTGCTGACCCAATCTCCAGGTTCTTTGGCTGTGTCTCTAGGGCAGAGGGCCACCATCTCCTGCAAGGCCAGCCAAAGTGTTGATTCTGATGGTGATAGTTATATGAACTGGTACCAACAGAAACCAGGACAGCCACCCAAACTCCTCATCTATGCTGCATCCAATCTAGAATCTGGGATCCCAGCCAGGTTTAGTGGCAGTGGGTCTGCGACAGACTTCACCCTCAACATCCATCCTGTGGAGGAGGAGGATGCTGCAACCTATTACTGTCAGCAAAGTAATGAGGATCCTTGGACGTTCGGTGGAGGCACCAAGCTAGAAATCAAACGG	IGKV3-4*01	IGKJ1*01	3	100	100	100	100	100	100
30	S816	3	7	IgA	ATGGGCAGGCTTACTTCTTCATTCCTGCTACTGATTGTCCCTGCATATGTCCTGTCCCAGGTCACTCTGAAAGAGTCTGGCCCTGGGATATTGCAGCCCTCCCAGACCCTCAGTCTGACTTGTTCTTTCTCTGGGTTTTCACTGAGCACTTATGGTATGGGTGTAGGTTGGATTCGTCAGCCTTCAGGGAAGGGTCTGGAGTGGCTGGCCAACATTTGGTGGAATGATGATAAGTACTATAACTCAGTCCTGAAGAGCCGGCTCACAATCTCCAAGGATGCCTCCAACAACCAGGTATTCCTCAAGATCTCCAGTGTGGACACTGCAGATACTGCCACATACTACTGTGCTCAAATTGCTGGGGCCTACTATAGTGACTTTGACTCCTGGGGCCAAGGC…	IGHV8-5*01	IGHD2-12*01,IGHD2-5*01,IGHD2-6*01	IGHJ2*01	14	98.7	90	90.2	100	95.6	100	ATGGAGACAGACACAATCCTGCTATGGGTGCTGCTGCTCTGGGTTCCAGGCTCCACTGGTGACATTGTGCTGACCCAATCTCCAGCTTCTTTGGCTGTGTCTCTAGGGCAGAGGGCCACCATCTCCTGCAAGGCCAGCCAAAGTGTTGATTCTGATGGTGATAGTTATATGAACTGGTACCAACAGAAACCAGGACAGCCACCCAAACTCCTCATCTATGCTGCATCCAATCTAGAATCTGGGATCCCAGCCAGGTTTAGTGGCAGTGGGTCTGCGACAGACTTCACCCTCAACATCCATCCTGTGGAGGAGGAGGATGCTGCAACCTATTACTGTCAGCAAAGTAATGAGGATCCTTGGACGTTCGGTGGAGGCACCAAGCTAGAAATCAAACGG	IGKV3-4*01	IGKJ1*01	2	97.4	100	100	88.9	100	100
31	N34	4	8	IgA	ATGGCTGTCCTGGCGCTACTCCTCTGCCTGATGACTTTCCCAAGCTGTGCCCTGTCCCAGGTGCAGCTGAAGGAGTCAGGACCTGGCCTGGTGGCGCCCTCACAGAGCCTGTCCATCACATGCACTGTCTCTGGGCTCTCATTAACCAGCTATGCTATAAACTGGGTTCGCCAGCCACCAGGAAAGGGTCTGGAGTGGCTTGGAGTAATCTGGACTGGTGGAGGCACAAATTATAATTCAGCTCTCAGATCCAGACTGCGCATCAGTAAAGACAACTCCAAGAGTCAAGTTTTCTTAAAAATGAACAGTCTGCAAACTGATGACACAGCCAGGTACTACTGTGCCCTCTGCTATGGTAACTTTCTCTTTGCTATGGACTACTGGGGTCGAGGAACCTCA…	IGHV2-9-1*01	IGHD2-1*01,IGHD2-8*01	IGHJ4*01	6	100	95.8	98	95.2	97.4	100	ATGGAATCACAGACTCAGGTCCTCATCTCCTTGCTGTTCTGGGTATCTGGTACCTGTGGGGACATTGTGATGACACAGTCTCCATCCTCCCTGAGTGTGTCAGCAGGAGAGAAGGTCACTATGAGCTGCACGTCCAGTCAGAGTCTGTTAAACAGTGGAAATCAAAAGAACTACTTGGCCTGGTACCAGCAGAAACCAGGGCAGCCTCCTAAACTGTTGATCTACGGGGCATCCACTAGGGAATCTGGGGTCCCTGATCGCTTCGCAGGCAGTGGATCTGGAACCGATTTCACTCTTACCATCAGCAGTGTGCAGGCTGAAGACCTGGCAGTTTATTACTGTCAGAATGATCACAGTTATCCGTACACGTTCGGAGGGGGGACCAAGCTGGAAATAAAA…	IGKV8-28*01	IGKJ2*01	3	100	100	100	100	99.1	100
32	N25A	5	9	IgA	ATGGGATGGAGCTGGATCTTTCTCTTTCTCCTGTCAGTAACTGCAGGTGTGTTCTCTGAGGTTCAGCTGCAGCAGTCTGGACCTGAGCTGGTGAAGCCTGGGACTTCAGTGAAGATCTCCTGCAAGACTTCTGGTTTCTCATTTATTGGCTACTATTTGAACTGGGTGAAGCAGAGCCATGGAAAGAGCCTTGAGTGGATTGGACGTATTAATCCTTACGATGGTGATAGTTTCTACAACCAGAAGTTCAGGGGCAAGGCCACATTAACTGTAGACAAATCCTCTAGCACAGCCCATATGGAACTCCGGAGCCTGACATCTGAGGACTCTGCAGTCTATTATTGTACTAAGACGAATAGTAACTATGCTATGGACTACTGGGGTCAAGGAACCTCAGTC…	IGHV1-20*01,IGHV1-20*02,IGHV1-37*01	IGHD2-5*01,IGHD2-6*01	IGHJ4*01	15	94.7	87.5	96.1	91.7	96.5	-	ATGGTGCCCACTTCTCAGGTCCTTGGATTTTTGCTTTTCTGGACTTCAGCCTCCAGATGTGACATTCTGATGACTCAGTCTCCAGCCACCCTGTCTGTGATTCCAGGAGATAGGGTCTCTCTTTCCTGCAGGGCCAGTCAGAGTATTAGGGACTACTTACACAGGTATCAACAAAAATCACATGAGTCTCCAAGGCTTCTCATCAAGTATGCTTCCCAATCCATCTCTGGGATCCCCTCCAGGTTCAGTGGCAGTGGATCAGGGTCAGATTTCACTCTCACTATCAACAGTGTGGAACCTGAAGATGTTGGAGTGTATTACTGTCAAAATGGTCACAGTTTTCCGCTCACGTTCGGTGCTGGGACCAAGCTGGAGcTGAAACGG	IGKV5-39*01	IGKJ5*01	9	100	97	100	100	100	100
33	S41G	ND	SP	IgG1	ATGGGTTGGCTGTGGAACTTGCTATTCCTGATGGCAGCTGCCCAAAGTGCCCAAGCACAGATCCAGTTGGTACAGTCTGGACCTGAGCTGAAGAAGCCTGGAGAGACAGTCAAGATCTCCTGCAAGGCTTCTGGGTATACCTTCACAATGTTTGGAATGAGCTGGGTGAAACAGGCTCCAGGAAAGGGTTTAAAGTGGATGGGCTGGATAAATACCTACTCTGGAGTGCCAACATATACTGATGACTTCAAGGGACGGTTTGCCTTCTCTTTGGAAACCTCTGCCAGCACTGCCTATTTGCAGATCAACAACCTCAAAAATGAGGACACGGCTACATATTTCTGTACAAGAGATGATGATTACGACGGCTTTGCTTACTGGGGCCAAGGGACTCTGGTC…	IGHV9-3*01	IGHD2-4*01,IGHD2-9*02	IGHJ3*01	6	100	87.5	100	95.8	99.1	83.3	ATGAAGTTGCCTGTTAGGCTGTTGGTGCTGATGTTCTGGATTCCTGCTTCCAGTAGTGATGTTGTGATGACCCAAACTCCACTCTCCCTGCCTGTCAGTCTTGGAGATCAAGCCTCCATCTCTTGCAGATCTAGTCAGAGCCTTGTATACAGTAATGGAAACACCTATTTACATTGGTACCTGCAGAAGCCAGGCCAGTCTCCAAAGCTCCTGATCTACAAAGTTTCCAACCGATTTTCTGGGGTCCCAGACAGGTTCAGTGGCAGTGGATCAGGGACAGATTTCACACTCAAGATCAGCAGAGTGGAGGCTGAGGATCTGGGAGTTTATTTCTGCTCTCAAAGTACACATGTTCCTTACACGTTCGGAGGGGGGACCAAGCTGGAAATAAAACGG	IGKV1-110*01	IGKJ2*01	1	100	100	100	100	99.1	95
34	S713	ND	SP	IgA	ATGGAATGTAACTGGATACTTCCTTTTATTCTGTCGGTAACTTCAGGGGTCTACTCAGAGGTTCAGCTCCAGCAGTCTGGGACTGTGCTGGCAAGGCCTGGGGCTTCAGTGAAGATGTCCTGCAAGGCTTCTGGCTACACCTTTACCAGCTACTGGATGCACTGGGTAAAACAGAGGCCTGGACAGGGTCTGGAATGGATTGGCGCTATTTATCCTGGAAATAGTGATACTAGCTACAACCAGAAGTTCAAGGGCAAGGCCAAACTGACTGCAGTCACATCTGCCAGCACTGCCTACATGGAGCTCAGCAGCCTGACAAATGAGGACTCTGCGGTCTATTACTGTACAAGACGGGGGGACTATAGTAACTACTACTTTGACTACTGGGGCCAAGGCACC…	IGHV1-5*01	IGHD2-5*01,IGHD2-6*01	IGHJ2*01	5	98.7	95.8	96.1	100	99.1	100	ATGGAATCACAGACCCAGGTCCTCATGTTTCTTCTGCTCTGGGTATCTGGTGCCTGTGCAGACATTGTGATGACACAGTCTCCATCCTCCCTGGCTATGTCAGTAGGACAGAAGGTCACTATGAGCTGCAAGTCCAGTCAGAGCCTTTTAAATAGTAGCAATCAAAAGAACTATTTGGCCTGGTACCAGCAGAAACCAGGACAGTCTCCTAAACTTCTGGTATACTTTGCATCCACTAGGGAATCTGGGGTCCCTGATCGCTTCATAGGCAGTGGATCTGGGACAGATTTCACTCTTACCATCAGCAGTGTGCAGGCTGAAGACCTGGCAGATTACTTCTGTCAGCAACATTATAGCACTCCGCTCACGTTCGGTGCTGGGACCAAGCTGGAGCTGAAA…	IGKV8-24*01	IGKJ5*01	0	100	100	100	100	100	100
35	S727	ND	SP	IgA	ATGGAATGTAACTGGATACTTCCTTTTATTCTGTCGGTAACTTCAGGGGTCTACTCAGAGGTTCAGCTCCAGCAGTCTGGGACTGTGCTGGCAAGGCCTGGGGCTTCAGTGAAGATGTCCTGCAAGGCTTCTGGCTACACCTTTACCAGCTACTGGATGCACTGGGTAAAACAGAGGCCTGGACAGGGTCTGGAATGGATTGGCGCTATTTATCCTGGAAATAGTGATACTAGCTACAACCAGAAGTTCAAGGGCAAGGCCAAACTGACTGCAGTCACATCTGCCAGCACTGCCTACATGGAGCTCAGCAGCCTGACAAATGAGGACTCTGCGGTCTATTACTGTACAAGACGGGGGGACTATAGTAACTACTACTTTGACTACTGGGGCCAAGGCACC…	IGHV1-5*01	IGHD2-5*01,IGHD2-6*01	IGHJ2*01	5	98.7	95.8	96.1	100	99.1	100	ATGGAATCACAGACCCAGGTCCTCATGTTTCTTCTGCTCTGGGTATCTGGTGCCTGTGCAGACATTGTGATGACACAGTCTCCATCCTCCCTGGCTATGTCAGTAGGACAGAAGGTCACTATGAGCTGCAAGTCCAGTCAGAGCCTTTTAAATAGTAGCAATCAAAAGAACTATTTGGCCTGGTACCAGCAGAAACCAGGACAGTCTCCTAAACTTCTGGTATACTTTGCATCCACTAGGGAATCTGGGGTCCCTGATCGCTTCATAGGCAGTGGATCTGGGACAGATTTCACTCTTACCATCAGCAGTGTGCAGGCTGAAGACCTGGCAGATTACTTCTGTCAGCAACATTATAGCACTCCGCTCACGTTCGGTGCTGGGACCAAGCTGGAGCTGAAA…	IGKV8-24*01	IGKJ5*01	0	100	100	100	100	100	100
36	S731	ND	SP	IgA	ATGGCTGTCCTGGCGCTACTCCTCTGCCTGATGACTTTCCCAAGCTGTGCCCTGTCCCAGGTGCAGCTGAAGGAGTCAGGACCTGGCCTGGTGGCGCCCACACAGAGCCTGTCCATCACATGCACTGTCTCTGGGTTCTCATTAACCAACTATGCTATAAGCTGGGTTCGCCAGCCACCAGGAAAGGGTCTGGAGTGGCTTGGAGTAATATGGACTGGTGGAGGCACAAATTATAATTCAGCTCTCAAATCCAGACTGAGCATCAGCAAAGACAACTCCAAGAGTCAAGTTTTCTTAAAAATGAACAGTCTGCAAACTGATGACACAGCCAGGTACTACTGTGCCAGAAAGGACTACTATAGTAACTACGGATTTGACTACTGGGGCCAAGGCACCACT…	IGHV2-9-1*01	IGHD2-5*01,IGHD2-6*01	IGHJ2*01	2	98.7	95.8	100	100	100	100	ATGGTATCCACACCTCAGTTCCTTGTATTTTTGCTTTTCTGGATTCCAGCCTCCAGAGGTGACATCTTGCTGACTCAGTCTCCAGCCATCCTGTCTGTGAGTCCAGGAGAAAGAGTCAGTTTCTCCTGCAGGGCCAGTCAGAGCATTGGCACAAGCATACACTGGTATCAGCAAAGAACAAATGGTTCTCCAAGGCTTCTCATAAAGTATGCTTCTGAGTCTATCTCTGGGATCCCTTCCAGGTTTAGTGGCAGTGGATCAGGGACAGATTTTACTCTTAGCATCAACAGTGTGGAGTCTGAAGATATTGCAGATTATTACTGTCAACAAAGTAATAGCTGGCCAACGCACGTTCGGTGCTGGGACCAAGCTGGAGCTGAAACGG	IGKV5-48*01	IGKJ5*01	0	100	100	100	100	100	100
37	S734	ND	SP	IgA	ATGGAATGTAACTGGATACTTCCTTTTATTCTGTCGGTAACTTCAGGGGTCTACTCAGAGGTTCAGCTCCAGCAGTCTGGGACTGTGCTGGCAAGGCCTGGGGCTTCAGTGAAGATGTCCTGCAAGGCTTCTGGCTACACCTTTACCAGCTACTGGATGCACTGGGTAAAACAGAGGCCTGGACAGGGTCTGGAATGGATTGGCGCTATTTATCCTGGAAATAGTGATACTAGCTACAACCAGAAGTTCAAGGGCAAGGCCAAACTGACTGCAGTCACATCTGCCAGCACTGCCTACATGGAGCTCAGCAGCCTGACAAATGAGGACTCTGCGGTCTATTACTGTACAAGACGGGGGGACTATAGTAACTACTACTTTGACTACTGGGGCCAAGGCACC…	IGHV1-5*01	IGHD2-5*01,IGHD2-6*01	IGHJ2*01	5	98.7	95.8	96.1	100	99.1	100	ATGGAATCACAGACCCAGGTCCTCATGTTTCTTCTGCTCTGGGTATCTGGTGCCTGTGCAGACATTGTGATGACACAGTCTCCATCCTCCCTGGCTATGTCAGTAGGACAGAAGGTCACTATGAGCTGCAAGTCCAGTCAGAGCCTTTTAAATAGTAGCAATCAAAAGAACTATTTGGCCTGGTACCAGCAGAAACCAGGACAGTCTCCTAAACTTCTGGTATACTTTGCATCCACTAGGGAATCTGGGGTCCCTGATCGCTTCATAGGCAGTGGATCTGGGACAGATTTCACTCTTACCATCAGCAGTGTGCAGGCTGAAGACCTGGCAGATTACTTCTGTCAGCAACATTATAGCACTCCGCTCACGTTCGGTGCTGGGACCAAGCTGGAGCTGAAA…	IGKV8-24*01	IGKJ5*01	0	100	100	100	100	100	100
38	S735	ND	SP	IgA	ATGGAATGTAACTGGATACTTCCTTTTATTCTGTCGGTAACTTCAGGGGTCTACTCAGAGGTTCAGCTCCAGCAGTCTGGGACTGTGCTGGCAAGGCCTGGGGCTTCAGTGAAGATGTCCTGCAAGGCTTCTGGCTACACCTTTACCAGCTACTGGATGCACTGGGTAAAACAGAGGCCTGGACAGGGTCTGGAATGGATTGGCGCTATTTATCCTGGAAATAGTGATACTAGCTACAACCAGAAGTTCAAGGGCAAGGCCAAACTGACTGCAGTCACATCTGCCAGCACTGCCTACATGGAGCTCAGCAGCCTGACAAATGAGGACTCTGCGGTCTATTACTGTACAAGACGGGGGGACTATAGTAACTACTACTTTGACTACTGGGGCCAAGGCACC…	IGHV1-5*01	IGHD2-5*01,IGHD2-6*01	IGHJ2*01	5	98.7	95.8	96.1	100	99.1	100	ATGGAATCACAGACCCAGGTCCTCATGTTTCTTCTGCTCTGGGTATCTGGTGCCTGTGCAGACATTGTGATGACACAGTCTCCATCCTCCCTGGCTATGTCAGTAGGACAGAAGGTCACTATGAGCTGCAAGTCCAGTCAGAGCCTTTTAAATAGTAGCAATCAAAAGAACTATTTGGCCTGGTACCAGCAGAAACCAGGACAGTCTCCTAAACTTCTGGTATACTTTGCATCCACTAGGGAATCTGGGGTCCCTGATCGCTTCATAGGCAGTGGATCTGGGACAGATTTCACTCTTACCATCAGCAGTGTGCAGGCTGAAGACCTGGCAGATTACTTCTGTCAGCAACATTATAGCACTCCGCTCACGTTCGGTGCTGGGACCAAGCTGGAGCTGAAA…	IGKV8-24*01	IGKJ5*01	0	100	100	100	100	100	100
39	S742	ND	SP	IgA	ATGGGTTGGCTGTGGAACTTGCTATTCCTGATGGCAGCTGCCCAAAGTGCCCAAGCACAGATCCAGTTGGTACAGTCTGGACCTGAGCTGAAGAAGACTGGAGAGACAGTCAAGATCTCCTGCAAGGCTTCTGGGTATACCTTCACAACCTATGGAATGAGCTGGGTGAAAGAGACTCCAGGAAAGGGTTTAAAGTGGATGGGCTGGATAAACACCTACTCTGGAGTGCCAACATATGATGATGACTTCAAGGGACGGTTTGCCTTCTCTTTGGAAACCTCTGCCAGCACTGCCTATTTGCAGATCAACAACCTCAAAAATGAGGACACGGCTACATATTTCTGTTCAAGAGATGATGATTACGACGGCTTTGCTTACTGGGGCCAAGGGACTCTGGTC…	IGHV9-3*01	IGHD2-4*01,IGHD2-9*02	IGHJ3*01	5	98.7	100	96.1	100	99.1	83.3	ATGAAGTTGCCTGTTAGGCTGTTGGTGCTGATGTTCTGGATTCCTGCTTCCAGCAGTGATGTTGTGCTGACCCAAACTCCACTCTCCCTGCCTGTCAATCTTGGAGATCAAGCCTCCATCTCTTGCAGATCTACTCAGAGCCTTGTATACAGTAATGGAAACACCTATTTACATTGGTACCTGCAGAAGCCAGGCCAGTCTCCAAAGCTCCTGATCTACAAAGTTTCCAACCGATTTTCTGGGGTCCCAGACAGGTTCAGTGGCAGTGGATCAGGGACAGATTTCACACTCAAGATCAGCAGAGTGGAGGCTGAGGATCTGGGAGTTTATTTCTGCTCTCAAAGTACACATATTCCTTACACGTTCGGAGGGGGGACCAAGCTGGAAATAAAACGG	IGKV1-110*01	IGKJ2*01	5	96.2	97	100	100	100	95.2
40	S744	ND	SP	IgA	ATGGGTTGGCTGTGGAACTTGCTATTCCTGATGGCAGCTGCCCAAAGTGCCCAAGCACAGATCCAGTTGGTACAGTCTGGACCTGAGCTGAAGAAGCCTGGAGAGACAGTCAAGATCTCCTGCAAGGCTTCTGGGTATACCTTCACAACCTATGGAATGAGCTGGGTGAAACAGGCTCCAGGAAAGGGTTTAAAGTGGATGGGCTGGATAAACACCTACTCTGGAGTGCCAACATATGCTGATGACTTCAAGGGACGGTTTGCCTTCTCTTTGGAAACCTCTGCCAGCACTGCCTATTTGCAGATCAACAACCTCAAAAATGAGGACACGGCTACATATTTCTGTGCAAGAGATGATGATTACGACGGCTTTGCTTACTGGGGCCAAGGGACTCTGGTC…	IGHV9-3*01	IGHD2-4*01,IGHD2-9*02	IGHJ3*01	0	100	100	100	100	100	100	ATGAAGTTGCCTGTTAGGCTGTTGGTGCTGATGTTCTGGATTCCTGCTTCCAGCAGTGATGTTGTGATGACCCAAACTCCACTCTCCCTGCCTGTCAGTCTTGGAGATCAAGCCTCCATCTCTTGCAGATCTAGTCAGAGCCTTGTATATAGTAATGGAAACACCTATTTACATTGGTACCTGCAGAAGCCAGGCCAGTCTCCAAAGCTCCTGATCTACAAAGCTTCCAACCGATTTTCTGGGGTCCCAGACAGGTTCAGTGGCAGTGGATCAGGGACAGATTTCACACTCAAGATCAGCAGAGTGGAGGCTGAGGATCTGGGAGTTTATTTCTGCTCTCAAAGTACACATGTTCCTTACACGTTCGGAGGGGGGACCAAGCTGGAAATAAAACGG	IGKV1-110*01	IGKJ2*01	3	100	93.9	100	88.9	100	100
41	S746	ND	SP	IgA	ATGGAATCTAACTGGATACTTCCTTTTATTCTGTCGGTAACTTCAGGGGTCTACTCAGAGGTTCAGTTCCAGCAGTCTGGGACTGTGCTGGCAAGGCCTGGGACTTCAGTGAAGATGTCCTGCAAGGCTTCTGGCTACACCTTTACCAGCTACTGGATGCACTGGATAAAACAGAGGCCTGGACAGGGTCTGGAATGGATTGGCGCTATTTATCCTGGAAATAGTGATACTAGCTACAACCAGAGGTTCAAGGGCAGGGCCAAACTGACTGCAGTCACATCTGCCAGCACTGCCTACATGGAGCTCAGCAGCCTGACAAATGACGACTCTGCGGTCTATTACTGTACAAGAGATTACTACGATGGTAGCCTGGCCTGGTTTGCTTACTGGGGCCAAGGG…	IGHV1-5*01	IGHD1-1*01,IGHD1-1*02	IGHJ3*01	11	96	95.8	94.1	100	96.5	100	ATGTCCTCTGCTCAGTTCCTTGGTCTCCTGTTGCTCTGTTTTCAAGGTACCAGATGTGATATCCAGATGACACAGACTACATCCTCCCTGTCTGCCTCTCTGGGAGACAGAGTCACCATCAGTTGCAGGGCAAGTCAGGATATTAGCAATTATTTAAACTGGTATCAGCAGAAACCAGATGGAACTGTTAAATTCCTGATCTACTATACATCAAGATTACACTCAGGAGTCCCATCAAGGTTCAGTGGCAGTGGGTCTGGGACAGATTATTCTCTCACCATCAGCAACCTGGAACCTGAAGATATTGCCACTTACTATTGTCAGCAGTATAGTAAGCTTCCGTATACGTTCGGATCGGGGACCAAGCTGGAAATAAAACGG	IGKV10-94*03	IGKJ2*03	2	100	100	98	88.9	100	100

## Sheet: No.3 mouse
No5	Clone No	Type	Group	Class	VH-D-J sequence	Top VH match	Top D match	Top J match	VH mismatche	FW1	CDR1	FW2	CDR2	FW3	CDR3	VK-J sequence	Top VK match	Top J match	VK mismatche	FW1	CDR1	FW2	CDR2	FW3	CDR3
1	N5038	1	1	IgA	ATGAACTTCAGGCTCAGCTTGATTTTCCTTGCCCTTATTTTAAAAGGAGTCCAGTGTGAAGTGAAGCTGGTGGAGTCTGGGGGAGGCTTAGTGAAGCCTGGAGGGTCCCTGAAACTCTCCTGTGCAGCCTCTGGATTCACTTTCAGTAACTATGCCATGTCTTGGGTTCGCCAGACTCCAGAGAAGAGGCTGGAGTGGGTCGCAGCCATTAATAGTAATGGTGGTAGCACCTACTATCCTGACACTGTGAAGGACCGATTCACCGTCTCCAGAGACAATGCCAAGAACACCCTGTACCTGCAAATGAGCAGTCTGAGGTCTGAGGACACAGCCTTGTATTACTGTGCAAGACATGGTGGTTACTACGTGGACTGGTATTTCGATGTCTGGGGCGCAGGG…	IGHV5-6-2*01	IGHD2-3*01	IGHJ1*01	11	96	87.5	98	100	96.5	100	ATGGATTTTCAGGTGCAGATTTTCAGCTTCCTGCTAATCAGTGCCTCAGTCATAATGTCCAGAGGACAAATTGTTCTCACCCAGTCTCCAGCAATCATGTCTGCATCTCTAGGGGAGGAGATCACCCTAACCTGCAGTGCCAGCTCGAGTGTAAGTGACATGCACTGGTTCCAGCAGAAGTCAGGCACTTCTCCCAAACTCTTGATTTATAGCACATCCAACCTGGCTTCTGGAGTCCCTTCTCGCTTCAGTGGCAGTGGGTCTGGGACCTTTTATTCTCTCACAATCAGCAGTGTGGAGGCTGAAGATGCT	IGKV4-80*01	IGKJ2*04	2	100	93.3	98	100	100	-
2	N5203	1	1	IgA	ATGAACTTCAGGCTCAGCTTGATTTTCCTTGCCCTTATTTTAAAAGGTGTCCAGTGTGAAGTGAAGCTGGTGGAGTCTGGGGGAGGCTTAGTGAAGCCTGGAGGGTCCCTGAAACTCTCCTGTGCAGCCTCTGGATTCACTTTCAGTAACTATGCCATGTCTTGGGTTCGCCAGACTCCAGAGAAGAGGCTGGAGTGGGTCGCAGCCATTAATAGTAATGGTGGTAGCACCTACTATCCTGACACTGTGAAGGGCCGATTCACCGTCTCCAGAGACAATGCCAAGAACACCCTGTACCTGCAAATGAGCAGTCTGAGGTCTGAGGACACAGCCTTGTATTACTGTGCAAGACATGGTGGTTACTACGTGGACTGGTATTTCGATGTCTGGGGCGCAGGG…	IGHV5-6-2*01	IGHD2-3*01	IGHJ1*01	10	96	87.5	98	100	97.4	100	ATGGATTTTCAGGTGCAGATTTTCAGCTTCCTGCTAATCAGTGCCTCAGTCATAATGTCCAGAGGACAAATTGCTCTCACCCAGTCTCCAGCAGTCATGTCTGCATCTCTAGGGGAGGAGATCACCCTAACCTGCAGTGCCAGCTCGAGTGTAAGTGACATGCACTGGTTCCAGCAGAAGTCAGGCACTTCTCCCAAACTCTTGATTTATAGCACATCCAACCTGGCTTCTGGAGTCCCTTCTCGCTTCAGTGGCAGTGGGTCTGGGACCTTTTATTCTCTCACAATCAGCAGTGTGGAGGCTGAAGATGCTGCCGATTATTACTGCCATCAGTGGAGTAGTTGGACGTTCGGTGGAGGCACCAAGCTGGAAATCAAACGG	IGKV4-80*01	IGKJ2*12	4	97.4	93.3	98	100	100	100
3	N5217	1	1	IgA	ATGAACTTCAGGCTCAGCTTGATTTTCCTTGCCCTTATTTTAAAAGGTGTCCAGTGTGAAGTGAAGCTGGTGGAGTCTGGGGGAGGCTTAGTGAAGCCTGGAGGGTCCCTGAAACTCTCCTGTGCAGCCTCTGGATTCACTTTCAGTAACTATGCCATGTCTTGGGTTCGCCAGACTCCAGAGAAGAGGCTGGAGTGGGTCGCAGCCATTAATAGTAATGGTGGTAGCACCTACTATCCTGACACTGTGAAGGACCGATTCACCGTCTCCAGAGACAATGCCAAGAACACCCTGTACCTGCAAATGAGCAGTCTGAGGTCTGAGGACACAGCCTTGTATTACTGTGCAAGACATGGTGGTTACTACGTGGACTGGTATTTCGATGTCTGGGGCGCAGGG…	IGHV5-6-2*01	IGHD2-3*01	IGHJ1*01	11	96	87.5	98	100	96.5	100	ATGGATTTTCAGGTGCAGATTTTCAGCTTCCTGCTAATCAGTGCCTCAGTCATAATGTCCAGAGGACAAATTGTTCTCACCCAGTCTCCAGCAGTCATGTCTGCATCTCTAGGGGAGGAGATCACCCTAACCTGCAGTGCCAGCTCGAGTGTAAGTGACATGCACTGGTTCCAGCAGAAGTCAGGCACTTCTCCCAAACTCTTGATTTATAGCACATCCAACCTGGCTTCTGGAGTCCCTTCTCGCTTCAGTGGCAGTGGGTCTGGGACCTTTTATTCTCTCACAATCAGCAGTGTGGAGGCTGAAGATGCT	IGKV4-80*01	N/A	3	98.7	93.3	98	100	100	-
4	N5104	1	2	IgA	ATGAAAGTGTTGAGTCTGTTGTACCTGTTGACAGCCATTCCTGGTATCCTGTCTGATGTACAGCTTCAGGAGTCAGGACCTGGCCTCGTGAAACCTTCTCAGTCTCTGTCTCTCACCTGCTCTGTCACTGGCTACTCCATCACCAGTGGTTATTACTGGAACTGGATCCGGCAGTTTCCAGGAAACAAACTGGAATGGATGGGCTACATAAGCTACGATGGTAGCAATAACTACAACCCATCTCTCAAAAATCGAATCTCCATCACTCGTGACACATCTAAGAACCAGTTTTTCCTGAACTTGAATTCTGTGACTACTGAGGACACAGCCACATATTACTGTGCGGAGGTACGCTGGTACTTCGATGTCTGGGGCGCAGGGACCACGGTCACCGTCTCC…	IGHV3-6*01	IGHD2-14*01	IGHJ1*01	1	100	100	100	100	99.1	100	ATGAGTGTGCCCACTCAGGTCCTGGGGTTGCTGCTGCTGTGGCTTACAGGTGCCAGATGTGACATCCAGATGACTCAGTCTCCAGCCTCCCTATCTGCATCTGTGGGAGAAACTGTCACCATCACATGTCGAGCAAGTGAGAATATTAACAGTAATTTAGCATGGTATCAGCAGAAACAGGGAAAATCTCCTCAGCTCCTGGTCTATGCTGCAACAATTTTAGCAGATGGTGTGCCATCAAGGTTCAGTGGCAGTGGATCAGGCACACAGTTTTCTCTGAAGATCAACAGCCTGCAGCCTGAAGATTTTGGGAGTTATTACTGTCAACATTTTTATGGTACTCCTCCGACGTTCGGTGGAGGCACCAAGCTGGAAATCAAACGG	IGKV12-44*01,IGKV12-46*01	IGKJ1*01	10	100	88.9	100	66.7	97.2	91.3
5	N5142	2	4	IgA	ATGGCTGTCCTGGCGCTACTCCTCTGCCTGATGACTTTCCCAAGCTGTGCCCTGTCCCAGGTGCAGCTGAAGGAGTCAGGACCTGGCCTGGTGGCGCCCTCACAGAGCCTGTCCATCACATGCACTGTCTCTGGGTTCTCATTAACCAACTATGCTATAAGCTGGGTTCGCCAGCCACCAGGAAAGGGTCTGGAGTGGCTTGGAGTAATATGGACTGGTGGAGGCACAAATTATAATTCAGCTCTCAAATCCAGACTGAGCATCAGCAAAGACAACTCCAAGAGTCAAGTTTTCTTAAAAATGAACAGTCTGCAAACTGATGACACAGCCAGGTACTACTGTGCCAGAATATTCTACTATAGTAACTACGAAAGGGTGGACTACTGGGGTCAAGGAACC…	IGHV2-9-1*01	IGHD2-5*01,IGHD2-6*01	IGHJ4*01	1	100	95.8	100	100	100	100	ATGGATTTTCAGGTGCAGATTTTCAGCTTCCTGCTAATCAGTGCCTCAGTCATAATGTCCAGAGGACAAATTGTTCTCACCCAGTCTCCAGCAATCATGTCTGCATCTCTAGGGGAGGAGATCACCCTAACCTGCAGTGCCAGCTCGAGTGTAAGTTACATGCACTGGTTCCAGCAGAAGTCAGGCACTTCTCCCAAACTCTTGATTTATAGCACATCCAACCTGGCTTCTAGAGTCCCTTCTCGCTTCAGTGGCAGTGGGTCTGGGACCTTTTATTCTCTCACAATCAGCAGTGTGGAGGCTGAAGATGCTGCCGATTATTACTGCCATCAGTGGAGTAGTTATCCATGGACGTTCGGTGGAGGCACCAAGCTGGAAATCAAACGG	IGKV4-80*01	IGKJ1*01	2	100	100	98	100	99.1	100
6	L514	2	5	IgA	ATGGGATGGAGCTGGATCTTTCTTTTCCTCCTGTCAGGAACTGCAGGTGTCCATTGCCAGATCCAGCTGCAGCAGTCTGGACCTGAGCTGGTGAAGCCTGGGGCTTCAGTGAAGATATCCTGCAAGGCTTCTGGCTACACCTTCACTGACTACTATATAAACTGGATGAGGCAGAGGCCTGGACAGGGCCTTGAGTGGATTGGATGGATTTATCCTGGAAGCGTTAATACTAAGTACAATGAGAAGTTCAAGGGCAAGGCCACATTGACTGTAGACACATCCTCCAGCACAGCCTACATGCAGTTCAGCAGCCTGACCTCTGAGGACTCTGCGGTCTATTTCTGTGGAAGATATGATTACGACCTCTATTACTATGCTGTGGACAACTGGGGTCAAGGA…	IGHV1-84*01	IGHD2-4*01,IGHD2-9*02	IGHJ4*01	6	100	100	94.1	95.8	99.1	83.3	ATGGAGACAGAGACACTCCTGCTATGGGTGCTACTGCTCTGGGTTCCAGGTTCCACAGGTAAAATTGTGCTGACCCAATCTCCAGCTTCTTTGGCTGTGTCTCTGAGGCAGAGGGCCACCATTTCCTGCAGAGCCAGTGAAAGTGTTGATAGTTATGGCAATAGTTTTATACACTGGTACCAGCAGAAACCAGGACAGCCACCCAAACTCCTCATCTATCGTGCATCCAACCTAGAATCTGGGGTCCCTGCCAGGTTCAGTGGCAGTGGGTCTAGGACAGACTTCACCCTCACCATTGATCCTGTGGAGGCTGATGATGCTGCAACCTATTACTGTCAGCAAAATAATGAGGATCCGTGGACGTTCGGTGGAGGCACCAAGCTGGAAATCAAACGG	IGKV3-10*01	IGKJ1*01	6	94.9	100	98	88.9	100	100
7	N5143	2	5	IgA	ATGGGATGGAGCTGGATCTTTCTTTTCCTCCTGTCAGGAACTGCAGGTGTCCATTGCCAGATCCAGCTGCAGCAGTCTGGACCTGAGCTGGTGAAGCCTGGGGCTTCAGTGAAGATATCCTGCAAGGCTTCTGGCTACACCTTCACTGACTACTATATAAACTGGATGAGGCAGAGGCCTGGACAGGGCCTTGAGTGGATTGGATGGATTTATCCTGGAAGCGTTAATACTAAGTACAATGAGAAGTTCAAGGGCAAGGCCACATTGACTGTAGACACATCCTCCAGCACAGCCTACATGCAGTTCAGCAGCCTGACCTCTGAGGACTCTGCGGTCTATTTCTGTGGAAGATATGATTACGACCTCTATTACTATGCTGTGGACAACTGGGGTCAAGGA…	IGHV1-84*01	IGHD2-4*01,IGHD2-9*02	IGHJ4*01	6	100	100	94.1	95.8	99.1	83.3	ATGGAGACAGAGACACTCCTGCTATGGGTGCTACTGCTCTGGGTTCCAGGTTCCACAGGTAAAATTGTGCTGACCCAATCTCCAGCTTCTTTGGCTGTGTCTCTGAGGCAGAGGGCCACCATTTCCTGCAGAGCCAGTGAAAGTGTTGATAGTTATGGCAATAGTTTTATACACTGGTACCAGCAGAAACCAGGACAGCCACCCAAACTCCTCATCTATCGTGCATCCAACCTAGAATCTGGGGTCCCTGCCAGGTTCAGTGGCAGTGGGTCTAGGACAGACTTCACCCTCACCATTGATCCTGTGGAGGCTGATGATGCTGCAACCTATTACTGTCAGCAAAATAATGAGGATCCGTGGACGTTCGGTGGAGGCACCAAGCTGGAAATCAAACGG	IGKV3-10*01	IGKJ1*01	6	94.9	100	98	88.9	100	100
8	L543	3	6	IgA	ATGAAATGCAGCTGGGTCATCTTCTTCCTGATGGCAGTGGTTATAGGGGTCAATTCAGAGGTTCAGCTGCAGCACTCTGGGGCAGAGCTTGTGAGGCCAGGGGCCTCAGTCAAGTTGTCCTGCACAGCTTCTGGCTTCAACATTAAAGACAGCCTTATGCACTGGGTGAAGCAGAGGCCTGAACAGGGCCTGGAGTGGATTGGATGGATTGATCCTGAGGATGGTGAAACTAAATATGCCCCGAAGTTCCAGGACAAGGCCACTATGACTGCAGACACATCCTCCAACACAGCCTACCTGCAGCTCAGCAGCCTGACATCTGAGGACACTGCCATCTATTACTGTGCTAGCCTGATCTACTATGGTGACCAAGGGTACTACTTTGACTACTGGGGCCAA…	IGHV14-1*01	IGHD2-13*01	IGHJ2*01	11	98.7	83.3	98	95.8	97.4	75	ATGAAACTCCTTGCTGAGCTCCTGGGGCTGCTGCTGTTCTGCTTTTTAGGTGTGAGATGTGACATCCAGATGAACCAGTCTCCATCCAGTCTGTCTGCATCCCTCGGAGACACAATTACCATCACTTGCCGTGCCAGTCAGAACATTAATATTTGGTTAAGCTGGTACCAGCAGAAACCAGGAAATATTCCTAAACTATTGATCTATAAGGCTTCCAACTTGCACACAGGCGTCCCATCAAGGTTTAGTGGCAGTGGATCTGTAACAGATTTCACATTAACCATCAGCAGTCTGCAGCCTGAAGACATTGCCACTTACTACTGTCTACAGGGTCAAAGTTATCCTCTCACGTTCGGTGCTGGGACCAAGCTGGAGCTGAAACGG	IGKV15-103*01	IGKJ5*01	7	97.4	94.4	100	100	97.2	95.7
9	N5120	3	6	IgA	ATGAAATGCAGCTGGGTCATCTTCTTCCTGATGGCAGTGGTTATAGGGGTCAATTCAGAGGTTCAGCTGCAGCAGTCTGGGGCAGAGCTTGTGAGGCCAGGGGCCTCAGTCAAGTTGTCCTGCACAGCTTCTGGCTTCAACATTAAAGACAGCCTTATACACTGGGTGAAGCAGAGGCCTGAACAGGGCCTGGAGTGGATTGGATGGATTGATCCTGAGGATGGTGAAACTAAATATGCCCCGAAGTTCCAGGACAAGGCCACTATAACTGCAGACACATCCTCCAACACAGCCTACCTGCAGCTCAGCAGCCTGACATCTGAGGACACTGCCATCTATTACTGTGCTAGCCTGATCTACTATGGTGACCAAGGGTACTACTTTGACTACTGGGGCCAA…	IGHV14-2*01,IGHV14-3*01	IGHD2-13*01	IGHJ2*01	12	98.7	83.3	94.1	100	96.5	100	ATGAAACTCCTTGCTGAGCTCCTGGGGCTGCTGCTGTTCTGCTTTTTAGGTGTGAGATGTGACATCCAGATGAACCAGTCTCCATCCAGTCTGTCTGCATCCCTCGGAGACACAATTACCATCACTTGCCGTGCCAGTCAGAACATTAATATTTGGTTAACCTGGTACCAGCAGAAACCAGGAAATATTCCTAAACTATTGATCTATAAGGCTTCCAACTTGCACACAGGCGTCCCATCAAGGTTTAGTGGCAGTGGATCTGTAACAGATTTCACATTAACCATCAGCAGTCTGCAGCCTGAAGACATTGCCACTTACTACTGTCTACAGGGTCAAAGTTATCCTCTCACGTTCGGTGCTGGGACCAAGCTGGAGCTGAAACGG	IGKV15-103*01	IGKJ5*01	8	97.4	94.4	98	100	97.2	95.7
10	N5131	3	6	IgA	ATGAAATGCAGCTGGGTCATCTTCTTCCTGATGGCAGTGGTTATAGGGGTCAATTCAGAGGTTCAGCTGCAGCAGTCTGGGGCAGAGCTTGTGAGGCCAGGGGCCTCAGTCAAGTTGTCCTGCACAGCTTCTGGCTTCAAAATTGAAGACTGCCTTATTCACTGGGTTAAACAGAGGCCTGACCAGGGCCTGGAGTGGATTGGATGGATTGCTCCTGTGGATGGTGAAACTAAGTCTGCCCCGAAGTTCCAGGACAAGGCCACTATTACTGCAGACACATCCTCCAACACAGCCTACCTGCAACTCAGCAGCCTGACATCTGAGGTCACTGCCATCTATTACTGTACTAGCCTGATCTACTATGGTGACCAAGGGTACTACTTTGACTACTGGGGCCAA…	IGHV14-1*01	IGHD2-13*01	IGHJ2*01	21	100	79.2	90.2	87.5	93	100	ATGAAACTCCTTGCTGAGCTCCTGGGGCTGCTGCTGTTCTGCTTTTTAGGTGTGAGATGTGACATCCAGATGAACCAGTCTCCATCCAGTCTGTCTGCATCCCTCGGAGACACAATTACCATCACTTGCCGTGCCAGTCAGAACATTAATATTTGGTTAAGCTGGTACCAGCAGAAACCAGGAAATATTCCTAAACTATTGATCTATAAGGCTTCCAACTTGCACACAGGCGTCCCATCAAGGTTTAGTGGCAGTGGATCTGGAACAGATTTCACATTAACCATCAGCAGTCTGCAGCCTGAAGACGTTGCCATTTACTACTGTCTACAGGGTCAAAGTTATCCTCTCACGTTCGGTGCTGGGACCAAGCTGGAGCTGAAACGG	IGKV15-103*01	IGKJ5*01	8	97.4	94.4	100	100	96.3	95.7
11	N5135	3	6	IgA	ATGAAATGCAGCTGGGTCATCTTCTTCCTGATGGCAGTGGTTATAGGGGTCAATTCAGAGGTTCAGCTGCAGCAGTCTGGGGCAGAGCTTGTGAGGCCAGGGGCCTCAGTCAGGTTGTCCTGCACAGCTTCTGGCTTCAAAATTAAAGACAGCCTTATACACTGGGTGAAGCAGAGGCCTGAACAGGGCCTGGAGTGGATTGGATGGATTGATCCTGAGGATGGTCAAACTAAATATGCCCCGAAGTTCCAGGACAAGGCCACTATAACTGCAGACACATCCTCCAACACAGCCTACCTGCAGCTCAGCAGCCTGACATCTGAGGACACTGCCATCTATTACTGTGCTAGCCTGATCTACTCTGGTGACCAAGGTTACTACTTTGACTACTGGGGCCAA…	IGHV14-3*01	IGHD2-13*01	IGHJ2*01	14	97.3	79.2	96.1	83.3	99.1	100	ATGAAACTCCTTGCTGAGCTCCTGGGGCTGCTGCTGTTCTGCTTTTTAGGTGTGAGATGTGACATCCAGATGAACCAGTCTCCATCCAGTCTGTCTGCATCCCTCGGAGACACAATTACCATCACTTGCCGTGCCAGTCAGAACATTAATATTTGGTTAATCTGGTACCAGCAGAAACCAGGAAATATTCCTAAACTATTGATCTATAAGGCTTCCAACTTGCACACAGGCGTCCCATCAAGGTTTAGTGGCAGTGGATCTGGAACAGATTTCACATTAACCATCAGCAGTCTGCAGCCTGAAGACATTGCCACTTACTACTGTCTACAGGGTCACACTTATCCTCTCACGTTCGGTGCTGGGACCAAGCTGGACCTGAAACGG	IGKV15-103*01	IGKJ5*01	9	97.4	94.4	98	100	98.1	87
12	N5225	3	6	IgA	ATGGCAGTGGTTATAGGGGTCAATTCAGAGGTTCAGCTGCAGCAGTCTGGGACAGAGCTTGTGAGGCCAGGGGCCTCAGTCAAGTTGTCCTGCACAGCTTCTGGCTTCAACATTAAAGACAGCCTTATACACTGGGTGAAACAGAGGCCTGAACAGGGCCTAGAGTGGATTGGATGGATTGATCCTGAGGATGGTGAAACTAAATATGCCCCGAAGTTCCAGGACAAGGCCACTATAACTGCAGACACATCCTCCAACACAGCCTACCTGCAGCTCAGCAGCCTGACATCTGAGGACACTGCCATCTATTACTGTGCTAGCCTGATCTACTATGGTGACCAAGGGTACTACTTTGACTACTGGGGCCAAGGCACCACTCTCACAGTCTCCTCAGAG	IGHV14-2*01,IGHV14-3*01	IGHD2-13*01	IGHJ2*01	15	97.3	83.3	90.2	100	96.5	100	ATGAAACTCCTTGCTGAGCTCCTGGGGCTGCTGCTGTTCTGCTTTTTAGGTGTGAGATGTGACATCCAGATGAACCAGTCTCCATCCAGTCTGTCTGCATCCCTCGGAGACACAATTACCATCACTTGCCGTGCCAGTCAGAACATTAATATTTGGTTAAGCTGGTACCAGCAGAAACCAGGAAATATTCCTAAACTATTGATCTATAAGGCTTCCAACTTGCACACAGGCGTCCCATCAAGGTTTAGTGGCAGTGGATCTGGAACAGATTTCACATTAACCATCAGCAGTCTGCAGCCTGAAGACATTGCCACTTACTACTGTCTACAGGGTCAAAGTTATCCTCTCACGTTCGGTGCTGGGACCAAGCTGGAGCTGAAACGG	IGKV15-103*01	IGKJ5*01	6	97.4	94.4	100	100	98.1	95.7
13	S524	3	6	IgA	ATGAAATGCAGCTGGGTCATCTTCTTCCTGATGGCAGTGGTTATAGGGGTCAATTCAGAGGTTCAGCTGCAGCAGTCTGGGGCAGAGCTTGTGAGGCCAGGGGCCTCAGTCAAGTTGTCCTGCACAGCTTCTGGCTTCAACATTAAAGACAGCCTTATGCACTGGGTGAAGCAGAGGCCTGAACAGGGCCTGGAGTGGATTGGATGGATTGATCCTGAGGATGGTGAAACTAAATATGCCCCGAAGTTCCAGGACAAGGCCACTATAACTGCAGACACATCCTCCAACACAGCCTACCTGCAGCTCAGCAGCCTGACATCTGAGGACACTGCCATCTATTACTGTGCTAGCCTGATCTACTATGGTGACCAAGGGTACTACTTTGACTACTGGGGCCAA…	IGHV14-2*01,IGHV14-3*01	IGHD2-13*01	IGHJ2*01	11	98.7	83.3	96.1	100	96.5	100	ATGAAACTCCTTGCTGAGCTCCTGGGGCTGCTGCTGTTCTGCTTTTTAGGTGTGAGATGTGACATCCAGATGAACCAGTCTCCATCCAGTCTGTCTGCATCCCTCGGAGACACAATTACCATCACTTGCCGTGCCAGTCAGAACATTAATATTTGGTTAAGCTGGTACCAGCAGAAACCAGGAAATATTCCTAAACTATTGATCTATAAGGCTTCCAACTTGCACACAGGCGTCCCATCAAGGTTTAGTGGCAGTGGATCTGTAACAGATTTCACATTAACCATCAGCAGTCTGCAGCCTGAAGACATTGCCACTTACTACTGTCTACAGGGTCAAAGTTATCCTCTCACGTTCGGTGCTGGGACCAAGCTGGAGCTGAAACGG	IGKV15-103*01	IGKJ5*01	7	97.4	94.4	100	100	97.2	95.7
14	S529	3	6	IgA	ATGAAATGCAGCTGGGTCATCTTCTTCCTGATGGCAGTGGTTATAGGGGTCAATTCAGAGGTTCAGCTGCAGCAGTCTGGGGCAGAGCTTGTGAGGCCAGGGGCCTCAGTCAGGTTGTCCTGCACAGCTTCTGGCTTCAAAATTAAAGACAGCCTTATACACTGGGTGAAGCAGAGGCCTGAACAGGGCCTGGAGTGGATTGGATGGATTGATCCTGAGGATGGTCAGACTAAATATGCCCCGAAGTTCCAGGACAAGGCCACTATTACTGCAGACACATCCTCCAACACAGCCTACCTGCAGCTCAGCAGCCTGACATCTGAGGACACTGCCATCTATTACTGTGCTAGCCTGATCTACTCTGGTGACCAAGGTTACTACTTTGACTACTGGGGCCAA…	IGHV14-3*01	IGHD2-13*01	IGHJ2*01	15	97.3	79.2	96.1	83.3	98.2	100	ATGAAACTCCTTGCTGAGCTCCTGGGGCTGCTGCTGTTCTGCTTTTTAGGTGTGAGATGTGACATCCAGATGAACCAGTCTCCATCCAGTCTGTCTGCATCCCTCGGAGACACAATTACCATCACTTGCCGTGCCAGTCAGAACATTAATATTTGGTTAATCTGGTACCAGCAGAAACCAGGAAATATTCCTAAACTATTGATCTATAAGGCTTCCAACTTGCACACAGGCGTCCCATCAAGGTTTAGTGGCAGTGGATCTGGAACAGATTTCACATTAACCATCAGCAGTCTGCAGCCTGAAGACATTGCCACTTACTACTGTCTACAGGGTCACACTTATCCTCTCACGTTCGGTGCTGGGACCAAGCTGGACCTGAAACGG	IGKV15-103*01	IGKJ5*01	9	97.4	94.4	98	100	98.1	87
15	S544	3	6	IgA	ATGAAATGCAGCTGGGTCATCTTCTTCCTGATGGCAGTGGTTATAGGGGTCAATTCAGAGGTTCAGCTGCAGCAGTCTGGGGCAGAGCTTGTGAGGCCAGGGGCCTCAGTCAAGTTGTCCTGCACAGCTTCTGGCTTCAAAATTGAAGACTGCCTTATTCACTGGGTTAAACAGAGGCCTGACCAGGGCCTGGAGTGGATTGGATGGATTGCTCCTGTGGATGGTGAAACTAAGTCTGCCCCGAAGTTCCAGGACAAGGCCACTATTACTGCAGACACATCCTCCAACACAGCCTACCTGCAACTCAGCACCCTGACATCTGAGGTCACTGCCATCTATTACTGTACTAGCCTGATCTACTATGGTGACCAAGGATACTACTTTGACTACTGGGGCCAA…	IGHV14-1*01	IGHD2-13*01	IGHJ2*01	22	100	79.2	90.2	87.5	92.1	100	ATGAAACTCCTTGCTGAGCTCCTGGGGCTGCTGCTGTTCTGCTTTTTAGGTGTGAGATGTGACATCCAGATGAACCAGTCTCCATCCAGTCTGTCTGCATCCCTCGGAGACACAATTACCATCACTTGCCGTGCCAGTCAGAACATTAATATTTGGTTAAGCTGGTACCAGCAGAAACCAGGAAATATTCCTAAACTATTGATCTATAAGGCTTCCAGCTTGCACACAGGCGTCCCATCAAGGTTTAGTGGCAGTGGATCTGGAACAGATTTCACATTAACCATCAGCAGTCTGCAGCCTGAAGACGTTGCCATTTACTACTGTCTACAGGGTCAAAGTTATCCTCTCACGTTCGGTGCTGGGACCAAGCTGGAGCTGAAACGG	IGKV15-103*01	IGKJ5*01	9	97.4	94.4	100	100	95.4	95.7
16	SS231	3	6	IgA	ATGAAATGCAGCTGGGTCATCTTCTTCCTGATGGCAGTGGTTATAGGGGTCAATTCAGAGGTTCAGCTGCAGCAGTCTGGGGCAGAGCTTGTGAGGCCAGGGGCCTCAGTCAAGTTGTCCTGCACAGCTTCTGGCTTCAACATTAAAGACAGCCTTATACACTGGGTGAAACAGAGGCCTGAACAGGGCCTAGAGTGGATTGGATGGATTGATCCTGAGGATGGTGAAACTAAATATGCCCCGAAGTTCCAGGACAAGGCCACTATAACTGCAGACACATCCTCCAACACAGCCTACCTGCAGCTCAGCAGCCTGACATCTGAGGACACTGCCATCTATTACTGTGCTAGCCTGATCTACTATGGTGACCAAGGGTACTACTTTGACTACTGGGGCCAA…	IGHV14-2*01,IGHV14-3*01	IGHD2-13*01	IGHJ2*01	14	98.7	83.3	90.2	100	96.5	100	ATGAAACTCCTTGCTGAGCTCCTGGGGCTGCTGCTGTTCTGCTTTTTAGGTGTGAGATGTGACATCCAGATGAACCAGTCTCCATCCAGTCTGTCTGCATCCCTCGGAGACACAATTACCATCACTTGCCGTGCCAGTCAGAACATTAATATTTGGTTAAGCTGGTACCAGCAGAAACCAGGAAATATTCCTAAACTATTGATCTATAAGGCTTCCAACTTGCACACAGGCGTCCCATCAAGGTTTAGTGGCAGTGGATCTGGAACAGATTTCACATTAACCATCAGCAGTCTGCAGCCTGAAGACATTGCCACTTACTACTGTCTACAGGGTCAAAGTTATCCTCTCACGTTCGGTGCTGGGACCAAGCTGGAGCTGAAACGG	IGKV15-103*01	IGKJ5*01	6	97.4	94.4	100	100	98.1	95.7
17	SS522	3	6	IgA	ATGAAATGCAGCTGGGTCATCTTCTTCCTGATGGCAGTGGTTATAGGGGTCAATTCAGAGGTTCAGCTGCAGCAGTCTGGGGCAGAGCTTGTGAGGCCAGGGACCTCAGTCAAGTTGTCCTGCACAGCTTCTGGCTTCAACATTAAAGACAGCCTTATACACTGGGTGAAACAGAGGCCTGAACAGGGCCTAGAGTGGATTGGATGGATTGATCCTGAGGATGGTGAAACTAAATATGCCCCGAAGTTCCAGGACAAGGCCACTATAACTGCAGACACATCCTCCAACACAGCCTACCTGCAGCTCAGCAGCCTGACATCTGAGGACACTGCCATCTATTACTGTGCTAGCCTGATCTACTATGGTGACCAAGGATACTACTTTGACTACTGGGGCCAA…	IGHV14-2*01,IGHV14-3*01	IGHD2-13*01	IGHJ2*01	15	97.3	83.3	90.2	100	96.5	100	ATGAAACTCCTTGCTGAGCTCCTGGGGCTGCTGCTGTTCTGCTTTTTAGGTGTGAGATGTGACATCCAGATGAACCAGTCTCCATCCAGTCTGTCTGCATCCCTCGGAGACACAATTACCATCACTTGCCGTGCCAGTCAGAACATTAATATTTGGTTAAGCTGGTACCAGCAGAAACCAGGAAATATTCCTCAACTATTGATCTCTAAGGCTTCCAACTTGCACACAGGCGTCCCATCAAGGTTTAGTGGCAGTGGATCTGGAACAGATTTCACATTAACCATCAGCAGTCTGCAGCCTGAAGACATTGCCACTTACTACTGTCTACAGGGTCAAAGTTATCCTCTCACGTTCGGTGCTGGGACCAAGCTGGAGCTGAAACGG	IGKV15-103*01	IGKJ5*01	8	97.4	94.4	96.1	100	98.1	95.7
18	N5106	4	7	IgA	ATGAAATGCAGCTGGGTCATCTTCTTCCTGATGGCAGTGGTTATAGGGGTCAATTCAGAGGTTCAGCTGCAGCAGTCTGGGGCTGAGCTTGTGAGGCCAGGGGCCTCAGTCAAGTTGTCCTGCACAGCTTCTGGCTTTAACATTAAAGACGACTATATGCACTGGGTGAAGCAGAGGCCTGAACAGGGCCTGGAGTGGATTGGATGGATTGATCCTGAGAATGGTGATACTGAATATGCCTCGAAGTTCCAGGGCAAGGCCACTATAACAGCAGACACATCCTCCAACACAGCCTACCTGCAGATCAGTAGCCTGACATCTGAGGACACTGCCGTCTATTACTGTACTCTGGCCTCCCTCTGGGGCCAAGGGACTCTGGTCACTGTCTCTGCAGAG	IGHV14-4*01	IGHD6-1*01,IGHD6-1*02,IGHD6-2-1*01	IGHJ3*01	2	100	100	100	100	98.2	100	ATGATGAGTCCTGCCCAGTTCCTGTTTCTGCTAGTGCTCTCGATTCAGGAAACCAACGGTGATGTTGTGATGACTCAGACCCCACTCACTTTGTCGGTTACCATTGGACAACCAGCCTCCATCTCTTGCAAATCAAGTCAGAGCCTCTTACATAGTAATGGAAAGACATATTTGAATTGGTTATTACAGAGGCCAGGCCAGTCTCCAAAGCTCCTAATCTATCTGGTGTCTAAACTGGAATCTGGAGTCCCTGACAGGTTCAGTGGCAGTGGATCAGGGACAGATTTCACACTGAAAATCAGCAGAGTGGAGGCTGAGGATTTGGGAGTTTATTACTGCTTGCAAGCTACACATTTTCCTTGGACGTTCGGTGGAGGCACCAAGCTGGAAATCAAACGG	IGKV1-135*01	IGKJ1*01	12	96.2	93.9	96.1	100	97.2	90.5
19	C501	5	8	IgA	ATGGAATGGAGCTGGATATTTCTCTTTCTCCTGTCAGGAACTGCAGGTGTCCACTCTGAGGTCCAGCTGCAGCAGTCTGGACCTGAGCTGGTAAAGCCTGGGGCTTCAGTGAAGATGTCCTGCAAGGCTTCTGGATACACATTCACTCGCTATGTTATACACTGGGTGAAGCAGAAGCCTGGGCAGGGCCTTGAGTGGATTGGATATATTAATCCTTACCATGATGGTACTGAGTACAATGGGAAGGTCAAAGGCAAGGCCACACTGACTTCAGACAAATCCTCCAACACAGCCTACATGGAGCTCAGCAGCCTGACCTCTGAGGACTCTGCGGTCTATTACTGTGCAAGATATGATGGTTACTACGTTTATTCTTTGGACTATTGGGGTCAAGGAACC…	IGHV1-14*01	IGHD2-3*01	IGHJ4*01	9	98.7	95.8	98	91.7	96.5	100	ATGAGACCCTCCATTCAGTTCCTGGGGCTCTTGTTGTTCTGGCTTCATGGTGCTCAGTGTGACATCCAGATGACACAGTCTCCATCCTCACTGTCTGCATCTCTGGGAGGCAAAGTCACCATCACTTGCAAGGCAAGCCAAGACATTAACAAGAATATAGCTTGGTACCAACACAAGCCTGGAAAAGGTCCTAGGCTGCTCATATGGTACACATCTACATTACAGCCAGGCATCCCATCAAGGTTCAGTGGAAGTGGGTCTGGGAGAGATTATTCCTTCAGCATCAGCAACCTGGAGCCTGAAGATATTGCAGCTTATTACTGTCTACAGTATGATAATCTTCCGTATACGTTCGGATCGGGGACCAGGCTGGAAATAAAACGG	IGKV19-93*01	IGKJ2*06	6	100	94.4	94.1	100	98.1	100
20	L515	5	8	IgA	ATGGAATGGAGCTGGATATTTCTCTTTCTCCTGTCAGGAACTGCAGGTGTCCACTCTGAGGTCCAGCTGCAGCAGTCTGGACCTGAGCTGGTAAAGCCTGGGGCTTCAGTGAAGATGTCCTGCAAGGCTTCTGGATACACATTCACTAACTATGTTATACACTGGGTGAAGCAGAAGCCTGGGCAGGGCCTTGAGTGGATTGGATATATTAATCCTTACAAGGATGGTACTCAGTACAATGAGAAGTTCAAAGGCAAGGCCACACTGACTTCGGACAAATCCTCCAGCACAGCCTACATGGAGCTCAGCAGTCTGACCTCTGAGGACTCTGCGGTCTATTACTGTGCAAGATATGATGGTTACTACGTTTATGCTCTGGACTACTGGGGTCAAGGAACC…	IGHV1-14*01	IGHD2-3*01	IGHJ4*01	8	98.7	95.8	98	91.7	97.4	100	ATGAGACCCTCCATTCAGTTCCTGGGGCTCTTGTTGTTCTGGCTTCATGGTGCTCAGTGTGACATCCAGATGACACAGTCTCCATCCTCACTGTCTGCATCTCTGGGAGGCAAAGTCACCATCACTTGCAAGACAAGCCAAGACATTAACAAGAATATAGGTTGGTACCAACACAAGCCTGGAAAAGGTCCTAGGCTGCTCATATGGTACACATCTACATTACAGCCAGGCATCCCATCAAGGGTCAGTGGAAGTGGGTCTGGGAGAGATTATTCCTTCAGCATCAGCAAGCTGGAGCCTGAAGATTTTGCAACTTATTACTGTCTACAGTATGATAATCTTCCGTATACGTTCGGATCGGGGACCAAGCTGGAAATAAAACGG	IGKV19-93*01	IGKJ2*03	10	98.7	94.4	92.2	100	96.3	100
21	L544	5	8	IgA	ATGGAATGGAGCTGGATATTTCTCTTTCTCCTGTCAGGAACTGCAGGTGTCCACTCTGAGGTCCAGCTGCAGCAGTCTGGACCTGAGCTGGTAAAGCCTGGGGCTTCAGTGAAGATGTCCTGCAAGGCTTCTGGATACACATTCACTAACTATGTTGTGCACTGGGTGAAGCAGAAGCCTGGGCAGGGCCTTGAGTGGATTGGATATTTTAATCCTTACAATGATGTTACTAATTACAATGAGAAGTTCAAAGGCAAGGCCACACTGACTTCAGACAAATCCTCCAGCACAGCCTACATGGAGCTCAGCAGCCTGACCTCTGGGGACTCTGCGGTCTATTACTGTGCAAGATATGATGGTTACTACGTTTATGCTATGGACTACTGGGGTCAAGGAACC…	IGHV1-14*01	IGHD2-3*01	IGHJ4*01	8	98.7	95.8	98	87.5	98.2	100	ATGAGACCCTCCATTCAGTTCCTGGGGCTCTTGTTGTTCTGGCTTCATGGTGCTCAGTGTGACATCCAGATGACACAGTCTCCATCCTCACTGTCTGCATCTCTGGGAGGCAAAGTCACCATCACTTGCAAGGCAAGCCAAGACATTAACAAGAATATAGCTTGGTACCAACACAAGCCTGGAAAAGGTCCTAGGCTGCTCATGTGGTTCACATCTACATTACAGCCAGGCATCCCATCAAGGTTCAGTGGAAGTGGGTCTGGGAGAGATTATTCTTTCAGCATCAGCAACCTGGAGCCTGAAGATTTTGCAACTTATTACTGTCTACAGTATGATAATCTTCCGTATACGTTCGGATCGGGGACCAAGCTGGAAATAAAACGG	IGKV19-93*01	IGKJ2*03	9	100	94.4	92.2	88.9	97.2	100
22	N5105	5	8	IgA	ATGGAATGGAGCTGGATATTTCTCTTTCTCCTGTCAGGAACTGCAGGTGTCCACTCTGATGTCCAGCTGCAGCAGTCTGGACCTGAGCTGGTAAAGCCTGGGGCTTCAGTGAAGATGTCCTGCAAGGCTTCTGGATACACATTCACTAGCTATGTTATACACTGGGTGAAGCAGAAGCCTGGGCAGGGCCTTGAGTGGATTGGATATATTAATCCTTACAATGATGGTACTAAGTACAATGAGAAGTTCAAAGGCAAGGCCACACTGACTTCAGACAAATCCTCCAGCACAGCCTACATGGAGCTCAGCAGCCTGACCTCTGAGGACTCTGCGGTCTATTACTGTGCAAGATATGATGGTTACTACGTTTATGCTTTGGACTACTGGGGTCAAGGAACC…	IGHV1-14*01	IGHD2-3*01	IGHJ4*01	2	100	100	98	95.8	100	100	ATGAGACCCTCCATTCAGTTCCTGGGGCTCTTGTTGTTCTGGCTTCATGGTGCTCAGTGTGACATCCAGATGACACAGTCTCCATCCTCACTGTCTGCATCTCTGGGAGGCAAAGTCACCATCACTTGCAGGGCAAGCCAAGACATTAACAAGAATATAGCTTGGTACCAACACAAACCTGGAAAAGGTCCTAGGCTGCTCATATGGTATACATCTACATTACAGTCAGGCATCCCATCAAGGTTCAGTGGAAGTGGGTCTGGGAGAGATTATTCCTTCAGCATCAGCAACCTGGAGCCTGAAGATATTGCAACTTATTACTGTCTACAGTATGATAATCTTCCGTATACGTTCGGATCGGGGACCAAGCTGGAAATAAAACGG	IGKV19-93*01	IGKJ2*03	9	98.7	94.4	92.2	88.9	98.1	100
23	N5121	5	8	IgA	ATGGAATGGAGCTGGATATTTCTCTTTCTCCTGTCAGGAACTGCAGGTGTCCACTCTGAGGTCCAGCTGCAGCAGTCTGGACCTGAGCTGGTAAAGCCTGGGGCTTCAGTGAAGATGTCCTGCAAGGCTTCTGGATACACATTCACTAGCTATGTTATACACTGGGTGAAGCAGAAGCCTGGGCAGGGCCTTGAGTGGATTGGATATTTTAATCCTTACAATGATGGTACTAGTTACAATGAGAAGTTCAAAGGCAAGGCCACACTGACTTCAGACAAATCCTCCAGCACAGCCTACATGGAGCTCAGCAGCCTGACCTCTGGGGACTCTGCGGTCTATTACTGTGCAAGATATGATGGTTACTACGTTTATGCTTTGGACTACTGGGGTCAAGGAACC…	IGHV1-14*01	IGHD2-3*01	IGHJ4*01	7	98.7	100	98	91.7	97.4	100	ATGAGACCCTCCATTCAGTTCCTGGGGCTCTTGTTGTTCTGGCTTCATGGTGCTCAGTGTGACATCCAGATGACACAGTCTCCATCCTCACTGTCTGCATCTCTGGGAGGCAAAGTCACCATCACTTGCAAGGCAAGCCAAGACATTAACAAGAATATAGCTTGGTACCAACACAAGCCTGGAAAAGGTCCTAGGCTGCTCATGTGGTACACATCTACATTACAGCCAGGCATCCCATCAAGGTTCAGTGGAAGTGGGTCTGGGAGAGATTATTCCTTCAGCATCAGCAACCTGGAGCCTGAAGATATTGCAACTTATTACTGTCTACAGTATGATACTCTTCCGTATACGTTCGGATCGGGGACCAAGCTGGAAATAAAACGG	IGKV19-93*01	IGKJ2*03	7	100	94.4	92.2	100	99.1	94.7
24	N5146	5	8	IgA	ATGGAATGGAGCTGGATATTTCTCTTTCTCCTGTCAGGAACTGCAGGTGTCCACTCTGAGGTCCAGCTGCAGCAGTCTGGACCTGAGCTGGTAAAGCCTGGGGCTTCAGTGAAGATGTCCTGCAAGGCTTCTGGATACACATTCACTAGATATGTTATACACTGGGTGAAGCAGAAGCCTGGGCAGGGCCTTGAGTGGATTGGATATTTTAATCCTTACAATGATGGTACTCATTTCAATGAGAAGTTCAAAGGCAAGGCCACACTGACTTCAGACAAATCCTCCAGCACAGCCTACATGGAGCTCAGCAGCCTGACCTCTGGGGACTCTGCGGTCTATTACTGTGCAAGATATGATGGTTACTACGTTTATGCTCTGGACTACTGGGGTCAAGGAACC…	IGHV1-14*01	IGHD2-3*01	IGHJ4*01	9	98.7	95.8	98	91.7	96.5	100	ATGAGACCCTCCATTCAGTTCCTGGGGCTCTTGTTGTTCTGGCTTCATGGTGCTCAGTGTGACATCCAGATGACACAGTCTCCATCCTCACTGTCTGCATCTCTGGGAGGCAAAGTCACCATCACTTGCAAGGCAAGCCAAGACATTAACAAGAATATAGTTTGGTACCAACACAAGCCTGGAAAAGGTCCTAGGCTGCTCATGTGGTACACATCTACATTACAGCCAGGCATCCCATCAAGGTTCAGTGGAAGTGGGTCTGGGAGAGATTATTCCTTCAGCATCAGCAACCTGGAGCCTGAAGATATTGCAACTTATTACTGTCTACAGTATGATAATCTTCCGTATACGTTCGGATCGGGGACCAAGCTGGAAATAAAACGG	IGKV19-93*01	IGKJ2*03	7	100	94.4	90.2	100	99.1	100
25	N5208	5	8	IgA	ATGGAATGGAGCTGGATATTTCTCTTTCTCCTGTCAGGAACTGCAGGTGTCCACTCTGAGGTCCAGCTGCAGCAGTCTGGACCTGAGCTGGTAAAGCCTGGGGCTTCAGTGAAGATGTCCTGCAAGGCTTCTGGATACACATTCATTAGTTATGTTTTGCACTGGGTGAAGCAGAAGCCTGGGCAGGGCCTTGAGTGGATTGGATATATTAATCCTTACAATGATGGTACTGAGTACAATGAGAAGTTCAAAGGCAGGGCCACACTGACTTCAGACAAATCCTCCAGCACAGCCTACATGGAGCTCAGCAGCCTGACCTCTGAGGACTCTGCGGTCTATTACTGTGCAAGATATGATGGTTACTACGTTTATGCTTTGGACTACTGGGGTCAAGGAACC…	IGHV1-14*01	IGHD2-3*01	IGHJ4*01	7	98.7	91.7	98	95.8	98.2	100	ATGAGACCCTCCATTCAGTTCCTGGGGCTCTTGTTGTTCTGGCTTCATGGTGCTCAGTGTGACATCCAGATGACACAGTCTCCATCCTCACTGTCTGCATCTCTGGGAGGCAAAGTCACCATCACTTGCAAGGCAAGCCAAGACATTAACAAGAATATAGCTTGGTACCAACACAAGCCTGGAAAAGGTCCTAGGCTGCTCATATGGTACACATCTACATTACAGCCAGGCATCCCATCAAGGTTCAGTGGAAGTGGGTCTGGGAGAGATTATTCCTTCAGCATCAGCAACCTGGAGCCTGAAGATATTGCAACTTATTACTGTCTACAGTATGATTATCTTCCGTATACGTTCGGATCGGGGACCAAGCTGGAAATAAAACGG	IGKV19-93*01	IGKJ2*03	6	100	94.4	94.1	100	99.1	94.7
26	N5220	5	8	IgA	ATGGAATGGAGCTGGATATTTCTCTTTCTCCTGTCAGGAACTGCAGGTGTCCACTCTGAGGTCCAGCTGCAGCAGTCTGGACCTGAGCTGGTAAAGCCTGGGGCTTCAGTGAAGATGTCCTGCAGGGCTTCTGGATACACATTCACTAGCTATGTTATACACTGGGTGAAGCAGAAGCCTGGGCAGGGCCTTGAGTGGATTGGATATAATAATCCTTACATGGATGGTACTGAGTACAATGCGAAGTTCAAAGGCAAGGCCACACTGACTTCAGACAAATCCTCCAGCACAGCCTACATGGAGCTCAGCAGCCTGACCTCTGAGGACTCTGCGGTCTATTACTGTGCAAGATACGATGGTTACTATCACTATGTTATGGACTACTGGGGGCAAGGAACC…	IGHV1-14*01	IGHD2-3*01	IGHJ4*01	9	97.3	100	98	83.3	98.2	100	ATGAGACCCTCCATTCAGTTCCTGGGGCTCTTGTTGTTCTGGCTTCATGGTGCTCAGTGTGACATCCAGATGACACAGTCTCCATCCTCACTGTCTGCATCTCTGGGAGGCAAAGTCACCATCACTTGCAAGGCAAGCCAAGACATTAACAAGAATATAGCTTGGTACCAACACAAGCCTGGAAAAGGTCCTAGGCTTCTCATATGGTACACATCTACATTACAGCCAGGCATCCCATCAAGGTTCAGTGGAAGTGGGTCTGGGAGAGATTATTCCTTCAGCATCAGCAACCTGGAGCCTGAAGATATTGCGACTTATTACTGTCTACAGTATGATATTCTTCCGTATACGTTCGGATCGGGGACCAAGCTGGAAATAAAACGG	IGKV19-93*01	IGKJ2*03	8	100	94.4	92.2	100	98.1	94.7
27	SS238	5	8	IgA	ATGGAATGGAGCTGGATATTTCTCTTTCTCCTGTCAGGAACTGCAGGTGTCCACTCTGAGGTCCAGCTGCAACAGTCTGGACCTGAGCTGGTTAAGCCTGGGGCTTCAGTGAAGATGTCCTGCAAGGCTTCTGGATACACATTCACTAGCTATGTTTTACACTGGGTGAAGCAGAAGCCTGGGCAGGGCCTTGAGTGGATTGGATATATTAATCCTTACTATGATGGTACTAAGTACAATGAGAAGTTCAAAGGCAAGGCCACACTGACTTCAGACAAATCCTCCAGTACAGCCTACATGGAGCTCAGCAGCCTGACCTCTGAGGACTCTGCGGTCTATTACTGTGCAAGATATGATGGTTACTACGTTTATGCTCTGGACTACTGGGGTCAAGGAACC…	IGHV1-14*01	IGHD2-3*01	IGHJ4*01	8	96	100	96.1	91.7	99.1	100	ATGAGACCCTCCATTCAGTTCCTGGGGCTCTTGTTGTTCTGGCTTCATGGTGCTCAGTGTGACATCCAGATGACACAGTCTCCATCCTCACTGTCTGCATCTCTGGGAGGCAAAGTCACCATCACTTGCAAGGCAAGCCAAGACATTAACAAGAATATAGCTTGGTACCAACACAAGCCTGGAAAAGGTCCTAGGCTGCTCATATGGTACACATCTTCATTACAGCCAGTCATCCCATCAAGGTTCAGTGGAAGTGGGTCTGGGAGAGATTATTCCTTCAGCATCAGCAACCTGGAGCCTGAAGATATTGCAACTTATTACTGTCTACAGTATGATAATCTTCCGTATACGTTCGGATCGGGGACCAAGCTGGATATAAAACGG	IGKV19-93*01	IGKJ2*03	7	100	94.4	94.1	100	97.2	100
28	C505	5	9	IgA	ATGGAATGGAACTGGGTCGTTCTCTTCCCCCTGTCATTAACTGCAGGTGTCTATTCCCAGGGTCAGATGCAGCAGTCTGGAGCTGAGCTGGTGAGGCCTGGGGCTTCAGTGAAGCTGTCCTGCAAGACTTCTGGCTTCACCTTCAGCAGTAGCTATATAAGTTGGTTGAAGCAGAAGCCTCGACAGAGTCTTGAGTGGATTGCATGGATTTATGCTGGAACTGGTGGTGCTAGCTATAATCAGCAGTTCGCAGGCAAGGCCCAACTGACTGTAGACACATCCTCCAGCACAGCCTACATGCAACTCAGCAGCCTGACATCTGAGGACTCTGCCATCTATTACTGTGCAAGACGGGGACATGGTGACTACGGCTGGTTTACTTACTGGGGCCAAGGGACT…	IGHV1-66*01,IGHV1-76*01,IGHV1-85*01	IGHD2-13*01	IGHJ3*01	46	89.3	70.8	82.4	79.2	85.1	100	ATGAGTGTGCCCACTCAGGTCCTGGGGTTGCTGCTGCTGTGGCTTACAGGTGCCAGATGTGACATCCAGATGACTCAGTCTCCAGCCTCCCTATCTGCATCTGTGGAAGAAACTGTCACCATCACATGTCGAGCAAGTGAGAATATTTACAGTAATTTAGCATGGTATCAGCAAAAACAGGGAAAATCTCCTCAGCTCCTGGTCTATACTGCAACAAATTTAGCAGATGGTGTGCCATCAAGGTTCAGTGGCAGTGGATCAGGCACACAGTTTTCTCTGAAGATCAACAGCCTGCAGCCTGAAGATTTTGGGAGTTATTACTGTCAACATTTTTATGGTACTCCGTGGACGTTCGGTGGAGGCACCAAGCTGGAAATCAAACGG	IGKV12-44*01	IGKJ2*09	10	98.7	94.4	98	77.8	97.2	90
29	N5136	5	9	IgA	ATGGAATGGAACTGGGTCGTTCTCTTCCTCCTGTCATTAACTGCAGGTGTCTATTCCCAGGGTCAGATGCAGCAGTCTGGAGCTGAGCTGGTGAGGCCTGGGGCTTCAGTGAAGCTGTCCTGCAAGACTTCTGGCTTCACCTTCAGCAGTAGCTATATAAGTTGGTTGAAGCAGAAGCCTCGACAGAGTCTTGAGTGGATTGCATGGATTTATGCTGGAACTGGTGGTGCTAGCTATAATCAGCAGTTCGCAGGCAAGGCCCAACTGACTGTAGACACATCCTCCAGCACAGCCTACATGCAACTCAGCAGCCTGACATCTGAGGACTCTGCCATCTATTACTGTGCAAGACGGGGACATGGTGACTACGGCTGGTTTACTTACTGGGGCCAAGGGACT…	IGHV1-66*01,IGHV1-76*01,IGHV1-85*01	IGHD2-13*01	IGHJ3*01	46	89.3	70.8	82.4	79.2	85.1	100	ATGAGTGTGCCCACTCAGGTCCTGGGGTTGCTGCTGCTGTGGCTTACAGGTGCCAGATGTGACATCCAGATGACTCAGTCTCCAGCCTCCCTATCTGCATCTGTGGAAGAAACTGTCACCATCACATGTCGAGCAAGTGAGAATATTTACAGTAATTTAGCATGGTATCAGCAAAAACAGGGAAAATCTCCTCAGCTCCTGGTCTATGCTGCAACAAATTTAGCAGATGGTGTGCCATCAAGGTTCAGTGGCAGTGGATCAGGCACACAGTTTTCTCTGAAGATCAACAGCCTGCAGCCTGAAGATTTTGGGAGTTATTACTGTCAACATTTTTATGGTACTCCGTGGACGTTCGGTGGAGGCACCAAGCTGGAAATCAAACGG	IGKV12-46*01	IGKJ1*01	10	97.4	100	98	100	95.4	90
30	N5204	5	10	IgA	ATGAACTTCGGGCTCAGCTTGATTTTCCTTGTCCTTGTTTTAAAAGGTGTCCAGTGTGAAGTGAAGCTGGTGGAGTCTGGGGGAGGCTTAGTGAAGCCTGGAGGGTCCCTGAAACTCTCCTGTGCAGCCTCTGGATTCACTTTCAGTAGTTATACCATGTCTTGGGTTCGCCAGATACCGACGAAGAGGCTGGAGTGGGTCGCAACCATTAGTAGTGGTGGTGGTAACACCTACTATCCAGACACTGTGAAGGGCCGATTCACCATCTCCAGAGACAATGCCAGGAACACCCTGTACCTGCAAATGAGCAGTCTGAGGTCTGAGGACACGGCCATGTATTACTGTTCAAGACATCCCCCTGCCTACTACCACTACTTTGACTACTGGGGCCAAGGCACC…	IGHV5-9*04	IGHD2-10*01,IGHD2-11*02,IGHD2-12*01	IGHJ2*01	10	100	95.8	92.2	95.8	97.4	85.7	ATGAGACCCTCCATTCAGTTCCTGGGGCTCTTGTTGTTCTGGCTTCATGGTGCTCAGTGTGACATCCAGATGACACAGTCTCCATCCTCACTGTCTGCATCTCTGGGAGGCAAAGTCACCATCACTTGCAAGGCAAGCCAAGACATTAACAAGAATATAGCTTGGTACCAACACAAGCCTGGAAAAGGTCCTAGGCTACTCATATGGTACACATCTACATTACAGCCAGGCATCCCATCAAGGTTCAGTGGAAGTGGGTCTGGGAGAGATTATTCCTTCAGCATCAGCAACCTGGAGCCTGAAGATATTGCAACTTATTACTGTCTACGGTATGATAATCTTCCGCTCACGTTCGGTGCTGGGACCAAGCTGGAGCTGAAACGG	IGKV19-93*01	IGKJ2*13	7	100	94.4	92.2	100	99.1	94.7
31	N5228	5	10	IgA	ATGAACTTCGGGCTCAGCTTGATTTTCCTTGTCCTTGTTTTAAAAGGTGTCCAGTGTGAAGTGAAGCTGGTGGAGTCTGGGGGAGGCTTACTGAAGCCTGGAGGGTCCCTGAAACTCTCCTGTACAGTCTCTGGATTCACTTTCAGTAGCTATAAGATGTCTTGGGTTCGCCAGACTCCGGCGAAGAGGCTGGAGTGGGTCGCAACCATTAGTAGTGGTGGTGGTGTTACCTACTATCCAGACACTGTGAAGGGCCGATTCACCATCTCCAGAGACAATGCCAGGAACATCTTGTACCTGCAAATGAGCAGTCTGAGGTCTGAGGACACGGCCATGTATTACTGTGCAAGACATCCCCCTGCCTACTACCACTACTTTGACTACTGGGGCCAAGGCACC…	IGHV5-9*02	IGHD2-10*01,IGHD2-11*02,IGHD2-12*01	IGHJ2*01	15	96	87.5	98	83.3	96.5	100	ATGAGACCCTCCATTCAGTTCCTGGGGCTCTTGTTGTTCTGGCTTCATGGTGCTCAGTGTGACATCCAGATGACACAGTCTCCATCCTCACTGTCTGCATCTCTGGGAGGCAAAGTCACCATCACTTGCAAGGCAAGCCAAGACATTAACAAGAATATAGTTTGGTACCAACACAAGCCTGGAAAAGGTCCTAGGCTGCTCATATGGTACACATCTACATTACAGCCAGGCATCCCTTCAAGGTTCAGTGGAAGTGGGTCTGGGAGAGATTATTCCTTCAGCATCAGCAACCTGGAGCCTGAAGATATTGCAACTTATTTCTGTCTACAGTATGATAATCTTCCGCTCACGTTCGGTGCTGGGACCAAGCTGGAGCTGAAACGG	IGKV19-93*01	IGKJ5*01	8	100	94.4	92.2	100	97.2	100
32	N5148	5	11	IgA	ATGGAATGGAGCAGAGTCTTTATCTTTCTCCTATCAGTAACTGCAGGTGTTCACTCCCAGGTCCAGCTGCTGCAGTCTGGAGCTGCGCTGGTAAGGCCTGGGACTTCAGTGAAGGTGTCCTGCAAGGCTTCTGGATACGCCTTCACTAATTACTTGATAGAGTGGGTAAAACAGAGGCCTGGACAGGGCCTTGAGTGGATTGGACTGACTAATCCTGGAAGTGGTGGTTCTAATTACAATGAAAAATTCAAGGACAAGGCAACACTGACTGCAGACAAATCCTCCAGCACTGCCTATATGCAGCTCAGCAGCCTGACATCTGAGGACTCTGCGGTCTATTTCTGTGCAAGAAGACGGGACTGGGACGAGGGGTGGTTTGCTTACTGGGGCCAAGGGACT…	IGHV1-54*01	IGHD4-1*01,IGHD4-1*02	IGHJ3*01	11	97.3	100	96.1	91.7	95.6	100	ATGGAATCACAGACTCTGGTCTTCATATCCATACTGCTCTGGTTATATGGTGCTGATGGGAACATTGTAATGACCCAATCTCCCAAATCCATGTCCATGTCAGTAGGAGAGAGGGTCACCTTGAGCTGCAAGGCCAGTGAGAATGTGGGTACTTATGTATCATGGTATCAACAGAAACCAGAGCAGTCTCCTAAAGTGCTGATATACGGGGCATCCAACCGGTACACTGGGGTCCCCGATCGGTTCACAGGCAGTGGATCTGTAACAGATTTCACTCTGACCATCAGCAGTGTGCAGGCTGAAGACCTTGCAGATTATTACTGTGGACAGAGTTACAGCTATCCTCTCACGTTCGGTGCTGGGACCAAGCTGGAAATGAAACGG	IGKV6-20*01	IGKJ2*05	5	100	100	96.1	100	97.2	100
33	N5207	5	11	IgA	ATGGAATGGAGCAGAGTCTTTATCTTTCTCCTATCAGTAACTGCAGGTGTTCACTCCCAGGTCCAGGTGCTGCAGTCTGGAGATGCGCTGGTAAGGCCTGGGACTTCAGTGAAGGTGTCCTGCAAGGCTTCTGGATACGCCTTCACTAATTACTTGATAGAGTGGGTAAAACAGAGGCCTGGACAGGGCCTTGAGTGGATTGGACTGACTAATCCTGGAAGTGGTGGTTCTAATTACAATGAAAAATTCAAGGACAAGGCAACACTGACTGCAGACAAATCCTCCAGCACTGCCTACATGCAGATCAGCAGCCTGACATATGAGGACTCTGCGGTCTATTTCTGTGCAAGAAGACGGGACTGGGACGAGGGGTGGTTTGCTTACTGGGGCCAAGGGACT…	IGHV1-54*01	IGHD4-1*01,IGHD4-1*02	IGHJ3*01	14	94.7	100	96.1	91.7	94.7	100	ATGGAATCACAGACTCTGGTCTTCATATCCATACTGCTCTGGTTATATGGTGCTGATGGGAACATTGTAATGACCCAATCTCCCAAATCCATGTCCATGTCAGTAGGAGAGAGGGTCACCTTGAGCTGCAAGGCCAGTGAGAATGTGGGTACTTATGTATCCTGGTATCAACAAAAACCCGAGCAGTCTCCTAAACTGCTGATATACGGGGCATCCAACCGGTACACTGGGGTCCCCGATCGGTTCACAGGCAGTGGATCTGTAACAGATTTCACTCTGACCATCAGCAGTGTGCAGGCTGAAGACCTTGCAGATTATTACTGTGGACAGAGTTACAGCTATCCTCTCACGTTCGGTGCTGGGACCAAGCTGGAACTGAAACGG	IGKV6-20*01	IGKJ2*15	5	100	100	96.1	100	97.2	100
34	N5206	5	12	IgA	ATGGAATGGAGCTGGATATTTCTCTTTCTCCTGCCAGGAACTGCAGGTGTCCACTCTGAGGTCCAACTGCAACAGTCTGGACCTGAGCTGGTAAAGCCTGGGGCTTCAGTGAAGATGTCCTGCAGGGCTTCTGGATACACATTCACTAGCTATGTTATGCACTGGGTGAAGCAGAAGCCTGGGCAGGGCCTTGAGTGGATTGGATATATTAATCCTTACAATGGTGGTACTAAGTACAATGAGAAGTTCAAAGGCAAGGCCACACTGACTTCAGACAAATCCTCCAGCACAGCCTACATGGAGCTCAGCAGCCTGACCTCTGAGGACTCTGCGGTCTATTACTGTTCAAGAGGGCATGGTAACTACGAGGGGTTTGCTTACTGGGGCCAAGGGACTCTG…	IGHV1-14*01	IGHD2-1*01,IGHD2-10*01,IGHD2-10*02	IGHJ3*01	7	94.7	100	100	91.7	100	83.3	ATGTCCTCTGCTCAGTTCCTTGGTCTCCTGTTGCTCTGTTTTCAAGGTACCAGATGTGATATCCAGATGACACAGACTACATCCTCCCTGTCTGCCTCTCTGGGAGACAGAGTCACCATCAGTTGCAGGGCAAGTCAGGATATTAGCAATTATTTAAACTGGTATCAGCAGAAACCAGATGGAACTGTTAAACTCCTGATTTACTACACATCAAGATTACACTCAGGAGTCCCATCAAGGTTCAGTGGCAGTGGGTCTGGGACAGATTATTCTCTCACCATCAGCAACCTGGAACCTGAAGATATTGCCACTTACTATTGTCAGCAGTATAGTAAGTTTCCGTGGACGTTCGGTGGAGGCACCAAGCTGGAAATCAAACGG	IGKV10-94*03,IGKV10-94*08	IGKJ2*14	2	100	100	98	100	100	95
35	N5144	5	13	IgA	ATGAAATTCAGCTGGGTCATCTTCTTCCTGATGGCAGTGGTTACAGGGGTCAATTCAGGGGTTCAGCTGCAGCAGTCTGGGGCTGAGCTTGTGAGGCCAGGGGCCTCAGTCAGGTTGTCCTGCACAGCTTCTGGCTTTAACATGAAAGACGACTATATGCACTGGGTGAAGCAGAGGCCTGAACAGGGCCTGGAGTGGATTGGAAGGATTGATCCTGCGAAAGCTTACACTAAATATGCCCCGAAGTTCCAGGACAAGGCCACTATAACTGCAGACACATCCTCCAACACAGCCTACCTGCAGCTCAGCAGCCTGACATCTGAGGACTCTGCCGTCTATTACTGTACTAGATTCTGGGACGACTACTGGGGCCAAGGCACCACTCTCACAGTCTCCTCA…	IGHV14-4*01	IGHD4-1*01,IGHD4-1*02	IGHJ2*01	13	98.6	95.8	98	79.2	95.6	100	ATGGAGTCACAGACTCAGGTCTTTGTATTCGTGTTGCTCTGGTTGTCTGGTGTTGATGGAGACATTGTGATGACCCAGTCTCAAAAATTCATGTCCACATCAGTAGGAGACAGGGTCACCATCACCTGCAAGGCCAGTCAGAATGTGGGTACTGATGTATCCTGGTATCAACAGAAACCAGGGAAATCTCCTAAATTACTGATTTACTGGGCATCAAACCGGTTCACTGGAGTCCCTGATCGCTTCACAGGCAGTGGATCTGGGACAGATTTCACTCTCACCATCAGCAATGTGCAGTCTGAAGACTTGGCAGATTATTTCTGTGAGCAATATAGCAGCTATCCGTATACGTTCGGATCGGGGACCAAGCTGGAAATAAAACGG	IGKV6-23*01	IGKJ2*03	13	97.4	88.9	94.1	88.9	96.3	95
36	N5219	5	14	IgA	ATGGGATGGAGCTGGATCTTTCTCTTTCTCCTGTCAGTAACTGCAGGTGTGTTCTCTGAGGTTCAGCTGCAGCAGTCTGGACCTGAGCTGGTGAAGCCTGGGGCTTCAGTGAAAATATCCTGCAAGGCTTCTGGTTACTCATTTACTGGCTACTTTATGAACTGGGTGAAGCAGAGTCATGGAAAGAGCCTTGAGTGGATTGGACGTATTGATCCTTACAATGGTAATACTTTCTACAACCAGAAGTTCAAGGGCAAGGCCACATTAACTGTAGACAAATCCTCTAACACTGCCCACATGGAGCTCCGGAGCCTGACATCTGAGGACTCTGCAGTCTTTTATTGTGCAAGATCCCATTACTTCGATGATACCTACCCGTGGGGCCAGGGGACTCTGGTC…	IGHV1-20*01,IGHV1-20*02,IGHV1-37*01	IGHD5-1-1*01,IGHD5-2*01,IGHD5-3*01	IGHJ3*02	10	97.3	100	96.1	91.7	96.5	100	ATGAAGTTGCCTGTTAGGTTGTTGGTGCTGTTGTTCTGGATTCCTGCTTTCAGCAGTGATGTTGTGATGACCCAAACTCCACTCTCCCTGCCTGTCAGTCTTGGAGATCAAGCTTCCATCTCTTGCAGATTTAGTCAGAGCCTTTTACACAGCAATGGAAACACCTATTTATATTGGTTCCTGCAGAAGCCAGGCCAGTCTCCAAAGCTCCTGATCTACAGGGTTTCCAACCGATTTTCTGGGGTCCCAGACAGGTTCAGTGGCAGTGGATCAGGGACAGATTTCACACTCAAGATCAGCAGAGTGGAGGCTGAGGATCTGGGAGTTTATTTCTGCTTTCAAAGTACACATGTTCCTCATACGTTCGGATCGGGGACCAAGCTGGAAATAAAACGG	IGKV1-110*02	IGKJ2*03	4	98.7	97	98	100	100	95.7
37	N5132	5	15	IgA	ATGAAAGTGTTGAGTCTGTTGTACCTGTTGACAGCCATTCCTGGTATCCTGTCTGATGTACAGCTTCAGGAGTCAGGACCTGGCCTCGTGAAACCTTCTCAGTCTCTGTCTCTCACCTGCTCTGTCACTGGCTACTCCATCACCAGTGGTTATTACTGGAACTGGATCCGGCAGTTTCCAGGAAACAAACTGGAATGGATGGGCTACATAAGCAACGATGGTAACAATAACTACAACCCATCTCTCAAAAATCGAATCTCCATCACTCGTGACACATCTAAGAACCAGTTTTTCCTGAAGTTGAATTCTGTGACTACTGAGGACACAGCCACATATTACTGTGCAAGAGCTGGGACGGGGGGGGCCTTTGACTACTGGGGCCAAGGCACCATTCTCACA…	IGHV3-6*01	IGHD4-1*01,IGHD4-1*02	IGHJ2*01,IGHJ2*03	2	100	100	100	90.5	100	100	ATGGATTTTCAGGTGCAGATTTTCAGCTTCCTGCTAATCAGTGCCTCAGTCATAATGTCCAGAGGAGAAAATGTGCTCACCCAGTCTCCAGCAATCATGTCTGCAACTCTAGGGGAGAAGGTCACCATGAGCTGCAGGGCCAGCTCAAATGTAGAGTACATTTACTGGTACCAGCAGAAGTCAGGTGCCTCCCCCAAACTATGGATTTATTACACATCCACCCTGGCTTCTGGAGTCCCAGCTCGCTTCAGTGGCAGTGGGTCTGGGACCTCTTATTCTCTCACAATCAGCAGCGTGGAGGCTGAAGATGCTGCCACTTATTACTGCCAGCAGTTTACTAGTTCCCCATATACGTTCGGATCGGGGACCAAGCTGGAAATAAAACGG	IGKV4-50*01	IGKJ2*03	11	98.7	80	96.1	100	95.4	100
38	N5226	5	16	IgA	ATGAACTTCGGGCTCACCTTGATTTTCCTTGTCCTTACTTTAAAAGGTGTCCAGTGTGAGGTGCAGCTGGTGGAGTCTGGGGGAGGCTTAGTGAAGCCTGGAGGGTCCCTGAAACTCTCCTGTGCAGCCTCTGGATTCACTTTCAATAGCTATGCCATGTCTTGGGTTCGCCAGACTCCAGAGAAGAGGCTGGAGTGGGTCGCTGCCATTAATAGTAATGGTGGTAGTGATTATTATCCAGACACTGTGAAGGACCGATTCTCCATCTCCAGAGACAATGCCAAGAACACCCTGTACCTGCAAATGAGCAGTCTGAGGTCTGAGGACACAGCCTTGTATTACTGTGCAAGACAAAGGAAGTCCCCCTACTATAGTAACTCATTTGACTACTGGGGCCAA…	IGHV5-6-2*01	IGHD2-5*01,IGHD2-6*01	IGHJ2*02	17	94.7	87.5	96.1	83.3	96.5	100	ATGGAATCACAGACTCAGGTCCTCATGTCCGTGCTGTTCTGGGTATCTGGTACCTGTGGGGACATTGTGATGACACAGTCTCCATCCTCCCTGACTGTGACAGCAGGAGAGAAGGTCACTATGAGCTGCAAGTCCAGTCAGAGTCTGTTAAACAGTGGAAATCAAAAGAAATACTTGACCTGGTACCAGCAGAAACCAGGGCAGCCTCCTAAACTGTTGATCTACTGGGCATCCACTAGGGAATCTGGGGTCCCTGATCGATTCACAGGCAGTGGATCTGGAACAGATTTCACTCTCACCATCACCACTGTGCAGGCTGAAGACCTGGCAGTTTATTACTGTCTGAATCATTATAGTTATCCATTCACTTTCGGCACGGGGACAAAATTGGAAATAATA…	IGKV8-19*01	IGKJ4*02	6	100	97.2	100	100	97.2	90
39	N5218	5	17	IgA	ATGGACTTGAGACTGAGCTGTGCTTTTATTATTGTTCTTTTAAAAGGGGTCCAGAGTGAAGTGAAGCTTGAGGAGTCTGGAGGAGGCTTGGTGCAACCTGGAGGATCCATGAAACTCTCCTGTGTTGCCTCTGGATTCACTTTCAGTAATTACTGGATGAACTGGGTCCGCCAGTCTCCAGAGAGGGGGCTTGAGTGGGTTGCTCAAATTAGATTGAAATCTGATAATTATGCAACACATTATGCGGAGTCTGTGAAAGGGAGGTTCACCATCTCAAGAGATGATTCCAAAAATAATATCTACCTACAAATGAACAACTTAAGGTCTGAAGACACTGGAATTTATTACTGCACAGGCTCTTATTACTACGATGGTCGCTACTGGTTTGCTTACTGGGGC…	IGHV6-3*01	IGHD1-1*01,IGHD1-1*02	IGHJ3*01	7	100	95.8	98	100	95.6	100	ATGGAGTCACAGACTCAGGTCTTTGTATTCGTGTTGCTCTGGTTGTCTGGTGTTGATGGAGACATTGTGATGACCCAGTCTCAAAAATTCATGTCCACATCAGTAGGAGACAGGGTCAGCATCACCTGCAAGGCCAGTCAGAATGTGGGTACTGATGTATCCTGGTATCAACAGAAACCAGGGAAATCTCCTAAACAACTGATCTACTGGGCATCAAACCGGTTCACTGGAGTCCCTGATCGCTTCACAGGCAGTGGATCTGGGACACATTTCACTCTCACCATCAGCAATGTGCAGTCTGAAGACTTGGCAGATTATTTCTGTGAGCAACATAGCAGTTATCCTCTGACGTTCGGTGGAGGCACCAAGCTGGAAATCAAACGG	IGKV6-23*01	IGKJ1*01	16	98.7	88.9	92.2	88.9	95.4	87
40	L509	ND	Lung	IgA	ATGCGATGGAGCTGGATCTTTCTCTTTCTCCTGTCAGTAACTGCAGGTGTGTTCTCTGAGGTTCAACTGCAGCAGTCTGGACCTGAGCTGGTGAAGCCTGGGGCTACAGTGAAGATATCCTGCAAGGCTTCTGGTTACTCATTTGCTGGCTATTTTATGAACTGGGTGATGCAGAGCCATGGAAAGAGCCTTGAGTGGATTGGACGTATTAATCCTTACAATGGTGATACTTTCTACAACCAGAAGTTCAAGGGCAAGGCCACATTGACTGTAGACAAATCCTCTGCCACAGCCCACATGGAGCTCCGGAGCCTGGCATCTGAGGACTCTGCGGTCTATTATTGTGCAAGAGGCCTACACCAAGGGGGGGATGCTTACTGGGGCCAAGGGACTCTGGTC…	IGHV1-20*02	IGHD2-10*01,IGHD2-11*02,IGHD2-12*01	IGHJ3*01	7	97.3	91.7	100	100	97.4	100	ATGGAATCACAGACTCTGGTCTTCATATCCATACTGCTCTGGTTATATGGTGTTGATGGGAACATTGTAATGACCCAATCTCCCAAATCCATGTCCATGTCAGTAGGAGAGAGGGTCACCATGAGCTGCAAGGCCAGTGAGAATGTGGGTAATTATGTATCATGGTATCAACAGAAACCAGAGCAGTCTCCTAAAGTACTGATATGCGGGGCATCCACCCGGTACACTGGGGTCCCCGATCGGTTCACAGGCAGTGGATCTGTAACAGATTTCACTCTGACCATCAGCAGTGTGCAGGCTGAAGACCTTGCAGATTATTACTGTGGACAGAGTTACAGCTGTCCTCTCACGTTCGGTGCTGGGACCAAGCTGGAGCTGAAACGG	IGKV6-20*01	IGKJ5*01	11	98.7	94.4	92.2	100	96.3	95.5
41	C503	ND	PBMC	IgA	ATGGGATGGAGCTGGATCTTTCTCTTTCTCCTGTCAGGAACTGCAGGTGTCCTCTCTGAGGTCCAACTGCAACAGTCTGGACCTGAGCTGGTGAAGCCTGGGGATTCAGTGAAGATGTCCTGCAAGGCTTCTGGCTACACATTCACTGACTTCTACATGAACTGGGTGAAGCAGAGCCATGGAAAGAACCTTGAGTGGATTGGATATATCTATCCTAACAATGGTGGTACTAATTACAATCAGAGGTTCAAGGACAAGGCCACATTGACTGTGGACAAGTCCTCCAGCACAGCCTACATGGAGCTCCACAGCCTGACATCTGAGGACTCTGCAGTCTATTACTGTGCAAGAAAGGATGATAGTTACTATAGTTCCTTTGCTTACTGGGGCCAAGGGACT…	IGHV1-34*02	IGHD2-12*01	IGHJ3*01	10	98.7	95.8	96.1	95.8	95.6	100	ATGAGTGTGCCCACTCAGGTCCTGGGGTTGCTGCTGCTGTGGCTTACAGGTGCCAGATGTGACATCCAGATGACTCAGTCTCCAGCCTCCCTATCTGCATCTGTGGGAGAAACTGTCACCATCACATGTCGAGCAACTGAGAATATTTACAATAATTTAGCATGGTATCAGCAGAAACAGGGAAAATCTCCTCAGCTCCTGGTCTATGCTGCAACAAATTTAGCAGATGGTGTGCCATCAAGATTCAGTGGCAGTGGATCAGGCACACAGTTTTCTCTGAGGATCAGCAGCCTGCAGCCTGAAGATTTTGGGAGTTATTACTGTCAACATTTTTATGATACTCCGTGGACGTTCGGTGGAGGCACCAAGCTGGAAATCAGTCGG	IGKV12-46*01	IGKJ2*07	14	97.4	94.4	100	100	92.6	85
42	C504	ND	PBMC	IgA	ATGAAATGCAGCTGGGTCATCTTCTTCCTGATGGCAGTGGTTATAGGGGTCAATTCAGAGGTTCAGCTGCAGCAGTCTGGGGCAGAGCTTGTGAGGCCAGGGGCCTCAGTCAAATTGTCCTGCACAGCTTCTGGCTTCAACATTAAAGACAGCCTTATGCACTGGGTGAAGCAGAGGCCTGAACAGGGCCTGGAGTGGATTGGATGGATTGATCCTGAGGATGGTGAAACTAAATGTGCCCCGAAGTTCCAGGACAAGGCCGCTGTAACTGCAGACACATCCTCCAACACAGCCTACCTGCAGCTCAGCAGCCTGACATCTGAGGACACTGCCATCTATTACTGTACTCGCGATTACTACGATGGTAGCCCCTATGCTATGGACTACTGGGGTCAAGGA…	IGHV14-1*01	IGHD1-1*01,IGHD1-1*02	IGHJ4*01	14	98.7	83.3	98	95.8	93.9	100	ATGGAATCACAGACTCTGGTCTTCATATCCATACTGCTCTGGTTATATGGTGCTGATGGGAACATTGTAATGACCCAATCTCCCAAATCCATGTCCATGTCAGTAGGAGAGAGGGTCACCTTGAGCTGCAAGGCCAGTGAGAATGTGGGTACTTATGTATCCTGGTATCAACAGAAACCAGAGCAGTCTCCTAAACTGCTGATATACGGGGCATCCAACCGGTACACTGGGGTCCCCGATCGGTTCTCAGGCAGTGGATCTGTAACAGATTTCACTCTGACCATCAGCAGTGTGCAGGCTGAAGACCTTGCAGATTATTACTGTGGACAGAGTTACAGCTATCCTCTCACGTTCTGTGCTGGGACCAAGCTGGAGCTGAAACGG	IGKV6-20*01	IGKJ2*08	4	100	100	100	100	96.3	100
43	C506	ND	PBMC	IgA	ATGGAATGGAGCTGGGTCTTTCTCTTCCTCCTGTCAGTAACTGCAGATGTCCAATCCCAGGTTCAACTGCAGCAGTCTGGGGCTGAGCTGGTGAGGCCTGGGGCTTCAGTGAAGCTGTCCTGCAAGGCTTCGGGCTACTCATTTACTGACTATGAAATGCACTGGGTGAAGCAGACACCTGTGCATGGCCTGGAATGGATTGGAGGTTTTGATCCTGAAACTGGTGGTACTGTCTACAATCAGAAGTTCAAGGGCAAGGCCACACTGACTGCAGACAAGTCCTCCAACACAGCCTACATGGAGCTCCGCAGCCTGACATCTGAGGACTCTGCCGTCTATTTCTGTACAAGGTACGATAGGGACCTACGCCACTTTACTATGGACTACTGGGGTCAAGGA…	IGHV1-15*01	IGHD2-14*01	IGHJ4*01	9	98.7	95.8	98	95.8	95.6	100	ATGTTGCTGCTGCTATGGGTATCTGGTACCTGTGGGGACATTGTGATGTCACAGTCTCCATCCGCCCTAGCTGTGTCAGTTGGAGAGAAGGTCACTATGAGCTGCAAGTCCAGTCAGAGCCTTTTATATAGTGCCAATCTAAAGAACTACTTGGCCTGGTACCAGCAGAAACCAGGGCAGTCTCCTAAACTGTTAATCTACTGGGCGTCCACTAGGAAATCTGGGGTCCCTGACCGCTTCACAGGCAGTAGATCAGGGACAGATTTCACTCTCACCATCAGCAGTGTGCAGGCTGAAGACCTGGCCGTTTATTACTGCAAGCAATCTTATAATCTTCCGCTCACGTTCGGTGCTGGGACCAAGCTGGAGCTGAAACGG	IGKV8-30*01	IGKJ2*10	18	97.4	91.7	94.1	88.9	93.5	84.6
44	C507	ND	PBMC	IgA	ATGGCTGTCCTGGGGCTGCTTCTCTGCCTGGTGACTTTCCCAAGCTGTGTCCTGTCCCAGGTGCAGCTGAAGGAGTCAGGACCTGGCCTGGTGGCGCCCTCACAGAGCCTGTCCATCACATGCACCGTCTCAGGGTTCTCATTAACCAGCTATGGTGTACACTGGGTTCGCCAGCCTCCAGGAAAGGGTCTGGAATGGCTGGTAGTGATATGGAGTGATGGAAGCACAACCTATAATTCAGCTCTCAAATCCAGACTGAGCATCAGCAAGGACAACTCCAAGAGCCAAGTTTTCTTAAAAATGAACAGTCTCCAAACTGATGACACAGCCATGTACTACTGTGCCAGACATGGAGGATGGTATGGTGACTACCTTTACTATGCTATGGACTACTGGGGT…	IGHV2-6-1*01,IGHV2-6-2*01	IGHD2-13*01	IGHJ4*01	2	98.7	100	98	100	100	100	ATGAAGTTGCCTGTTAGGCTGTTGGTGCTGATGTTCTGGATTCCTGCTTCCAGCAGTGATGTTGTGATGACCCAAACTCCACTCTCCCTGCCTGTCAGTCTTGGAGATCAAGCCTCCATCTCTTGCAGATCTAGTCAGAGCATTGTACATAGTAATGGAAACACCTATTTAGAATGGTACCTGCAGAAGCCAGGCCAGTCTCCAAAGCTCCTGATCTACAAAGTTTCCAACCGATTTTCTGGGGTCCCAGACAGGTTCAGTGGCAGTGGATCAGGGACAGATTTCACACTCAAGATCAGCAGATTGGAGGCTGAGGATCTGGGAGTTTATTACTGCTTTCAAGGTTCACATTTTCCTCGGACGTTCGGTGGAGGCACCAAGCTGGAAATCAAACGG	IGKV1-117*01	IGKJ2*11	4	98.7	100	98	100	99.1	95.5
45	S510	ND	Spleen	IgA	ATGGGATGGAGCTGGATCTTTCTCTTTCTCCTGTCAAAAACTGCAGGTGTCCTCTCTGAGGTCCAGCTGCAACAGTCTGGACCTGAGCTGGTGAAGCCTGGGGATTCAGTGAAGATGTCCTGCAAGGCTTCTGGCTACACATTCACTGACTACTACATGGACTGGGTGAAGCAGAGCCATGGAAAGAGCCTTGAGTGGATTGGATATATTTATCCTAACAATGGTGGCACTAACTACAATCAGAAATTCAAGGGCAAGGCCACATTGACTGTAGACAAGTCCTCCAGCACAGCCTACATGGAGCTCCACAGCCTGACATCTGAGGACTCTGCAGTCTATTACTGTGCAAGAAAGGATGATAGTTACTATAGTTCCTTTGCTTACTGGGGCCAAGGGACT…	IGHV1-34*02	IGHD2-12*01	IGHJ3*01	3	100	100	100	95.8	98.2	100	ATGAGTGTGCCCACTCAGGTCCTGGGGTTGCTGCTGCTGTGGCTTACAGGTGCCAGATGTGACATCCAGATGACTCAGTCTCCAGCCTCCCTATCTGCATCTGTGGGAGAAACTGTCACCATCACATGTCGACCGAGTGAGAATGTTTACAATAATTTAGCATGGTATCAGCAGAAACAGGGAAAGTCTCCTCACCTCCTGGTCTATGCTGCAACAAATTTAGCTGATGGTGTGCCATCAAGGTTCAGTGGCAGTGCATCAGGCACACAGTTTTCTCTGAAGATCAACAGCCTGCAGCCTGAAGATTTTGGGACTTATTACTGTCAACATTTTTATGGTACTCCATGGACGTTCGGTGGAGGCACCAAGCTGGAAGTCAGACGG	IGKV12-46*01	IGKJ1*01	17	96.2	88.9	96.1	100	92.6	90
46	S511	ND	Spleen	IgA	ATGAGAGTGTTGATTCTTGTGTACCTGTTGACAGCCCTTCCTGGTATCTTGTCTGATGTACAGCTTCAGGAGTCAGGACCTGGCCTGGTGAAGCCTTCTCAGACAGTGTCCCTCACCTGCACTGTCACTGGCTACTCTATCACTAATGGTAATCACTGGTGGAACTGGATCCGGCAGGTTTCAGGAAACAAACTGGAGTGGATAGGGTACATAAGCTCCAGTGGTGGCACTGACAGCAATCCATCTCTCAAAAGTCGAGTCTCCATCACTAGAGACACTTCCAAGAACCAGTTATTCCTGCAGTTGAACTCTGTGACTACTGAAGATGTAGCCACATATTACTGTGCAAGAGGACACTATGATTACGACGCGGGCTATGCTATGGACTACTGGGGTCAA…	IGHV3-4*01	IGHD2-4*01,IGHD2-9*02	IGHJ4*01	5	98.7	100	98	95.2	98.2	100	ATGCTTTTCTGGATTTCAGCCTCCAGAGGTGATATTGTGCTAACTCAGTCTCCAGCCACCCTGTCTGTGACTCCAGGAGATAGAGTCAGTCTTTCCTGCAGGGCCAGCCAAAGTATTAGCAACTACCTACACTGGTATCAACAAAAATCACATGAGTCTCCAAGGCTTCTCATCAAGTATGCTTCCCAGTCCATCTCTGGGATCCCCTCCAGGTTCAGTGGCAGTGGATCAGGGACAGATTTCACTCTCAGTATCAAAAGTGTGGAGACTGAAGATTTTGGAATGTATTTCTGTCAACAGAGTAACAGCTGGCCTCTCACGTTCGGTGCTGGGACCAAGCTGGAGCTGAAACGG	IGKV5-45*01	IGKJ5*01	2	98.7	100	100	100	99.1	100
47	S514	ND	Spleen	IgA	ATGAAATTCAGCTGGGTCATCTTCTTCCTGATGGCAGTGGTTACAGGGGTCAATTCAGAGGTTCAGCTGCAGCAGTCTGGGGCTGAGCTTGTGAGGCCAGGGGCCTCAGTCAAGTTGTCCTGCACAGCTTCTGGCTTTAACATTAAAGACGACTATATGCACTGGGTGAAGCAGAGGCCTGAACAGGGCCTGGAGTGGATTGGAAGGATTGATCCTGCGAATGGTAATACTAAATATGCCCCGAAGTTCCAGGACAAGGCCACTATAACTGCAGACACATCCTCCAACACAGCCTACCTGCAGCTCAGCAGCCTGACATCTGAGGACACTGCCGTCTATTACTGTGCTAGAAGGGCGATGGTAGATGCTATGGACTACTGGGGTCAAGGAACCTCAGTC…	IGHV14-3*01,IGHV14-3*02	IGHD1-1*02,IGHD1-3*01,IGHD2-1*01	IGHJ4*01	8	97.3	83.3	100	100	98.2	100	ATGTCCTCTGCTCAGTTCCTTGGTCTCCTGTTGCTCTGTTTTCAAGGTACCAGATGTGATATCCAGATGACACAGACTACATCCTCCCTGTCTGCCTCTCTGGGAGACAGAGTCACCATCAGTTGCAGGGCAAGTCAGGATATTAGCAATTATTTAAACTGGTATCAGCAGAAACCAGATGGAACTGTTAAACTCCTGATCTACTACACATCAAGATTACACTCAGGAGTCCCATCAAGGTTCAGTGGCAGTGGGTCTGGGACAGATTATTCTCTCACCATCAGCAACCTGGAACCTGAAGATATTGCCACTTACTATTGTCAGCAGTATAGTAAGCTTCCGTGGACGTTCGGTGGAGGCACCAAGCTGG	IGKV10-94*03,IGKV10-94*08	IGKJ1*01	0	100	100	100	100	100	100
48	S525	ND	Spleen	IgA	ATGGGATGGAGCTGTATCATCCTCTTTTTGGTAGCAGCAGCTACAGGTGTCCTCTCCCAGGTCCAACTGCAGCAGCCTGGTGCTGAGCTTGTGAAGCCTGGGGCCTCAGTGAAGCTGTCCTGCGAGGCTTCTGGCTACACTTTCACCAGTTTCTGGATAAACTGGGTGAAGCAGAGGCCTGGACAAGGCCTTGAGTGGATTGGAAATATCTATCCTGGAAGTAGTTATGCCAACTACAATGAGAAGTTCAGGAGCAAGGCCACACTGACTGTAGACACATCCTCCACCACAGCCTACATGCAGCTCAGCAGCCTGACATCTGACGACTCTGCGGTCTATTATTGTGCGCCCCATATTGACGGTTTTGCTTACTGGGGCCAAGGGACTCTGGTCGCTGTC…	IGHV1S61*01	IGHD1-1*01	IGHJ3*01	11	98.7	91.7	100	75	98.2	100	ATGAAGTTGCCTGTTAGGCTGTTGGTGCTGATGTTCTGGATTCCTGCTTCCAGCAGTGATGTTGTGATGACCCAAACTCCACTCTCCCTGCCTGTCAGTCTTGGAGATCAAGCCTCCATCTCTTGCAGATCTAGTCAGAGCATTGTACATAGTAATGGAAACACCTATTTAGAATGGTACCTGCAGAAGCCAGGCCAGTCTCCAAAGCTCCTGATCTACAAAGTTTCCAACCGATTTTCTGGGGTCCCAGACAGGTTCAGTGGCAGTGAATCAGGGACAGATTTCACACTCAAGATCAGCAGAGTGGAGGCTGAGGATCTGGGAGTTTATTACTGCTTTCAAGGTTCACATGTTCCTCATACGTTCGGATCGGGGACCAAGCTGGAAATAAAACGG	IGKV1-117*01	IGKJ2*03	3	98.7	100	98	100	99.1	100
49	S528	ND	Spleen	IgA	ATGAAAGTGTTGAGTCTGTTGTACCTGTTGACAGCCATTCCTGGTATCCTGTCTGATGTACAGCTTCAGGAGTCAGGACCTGGCCTCGTGAAACCTTCTCAGTCTCTGTCTCTCACCTGCTCTGTCACTGGCTACTCCATCACCAGTGGTTATTACTGGAACTGGATCCGGCAGTTTCCAGGAAACAAACTGGAATGGATGGGCTACATAAGCTACGATGGTAGCAATAACTACAACCCATCTCTCAAAAATCGAATCTCCATCACTCGTGACACATCTAAGAACCAGTTTTTCCTGAAGTTGAATTCTGTGACTACTGAGGACACAGCCACATATTACTGTGCAAGAGATCAGGGGACTGGGGTCTTTGCTTACTGGGGCCAAGGGACTCTGGTCACT…	IGHV3-6*01	IGHD4-1*01,IGHD4-1*02	IGHJ3*01	0	100	100	100	100	100	100	ATGGATTTTCAGGTGCAGATTTTCAGCTTCCTGCTAATCAGTGCCTCAGTCATAATGTCCAGAGGACAAATTGTTCTCACCCAGTCTCCAGCAATCATGTCTGCATCTCCTGGGGAACGGGTCACCATGACCTGCAGTGCCAGCTCAAGTGTAAGTTCCAGCTACTTGTACTGGTACCAGCAGAAGCCAGGATCCTCCCCCAAACTATGGATTTATAGCACATCCAACCTGGCTTCTGGAGTCCCTGCTCGCTTCAGTGGCAGTGGGTCTGGGACCTCTTATTCTCTCACAATCAGCAGCATGGAGGCTGAAGATGCTGCCACTTATTACTGCCAGCAGTACAGTGGTTACCCGCTCACGTTCGGTGCTGGGACCAAGCTGGAGCTGAAACGG	IGKV4-78*01	IGKJ5*01	6	94.9	100	98	100	99.1	100
50	S533	ND	Spleen	IgA	ATGAAATTCAGCTGGGTCATCTTCTTCCTGATGGCAGTGGTTACAGGGGTCAATTCAGAGGTTCAGCTGCAGCAGTCTGGGGCTGAGCTTGTGAGGCCAGGGGCCTCAGTCAAGTTGTCCTGCACAGCTTCTGGCTTTAACATTAAAGACGACTTTATACACTGGGTGAGACAGAGGCCTGAACAGGGCCTGGAGTGGATTGGAAGGATTGATCCTGCGAATGGTCATACTAGATATGTCCCGAGGTTCCAGGACAAGGCCACTATATCTGCAGACACATCCTCCAACACAGCCTACCTGCAACTCAGCAGCCTGACATCTGAGGACACTGCCGTCTATTATTGTACTACGCTGGGACGGTCCTGGGGCCAAGGGACTCTGGTCACTGTCTCTGCAGAG	IGHV14-4*01	IGHD4-1*01,IGHD4-1*02	IGHJ3*01	17	100	95.8	92.2	91.7	91.2	100	ATGAGTCCTGCCCGGTTCCTATTTCTGCTCGTGCTCTGGATTCAGAAAACCAACGGTGATGTTGTGATGACCCAGACTCCACTCATTTTGTCTGTTACCATTGGACAGCCAGCTTCCATTTCTTGCAAGTCAAGTCAGAGCCTCTTATATAGTGATGGAAGAACCTATTTGAACTGGTTATTTCAGAGTCCAGGCCAGTCTCCAAAGCTCCTAATCTATCTGGTGTCTAAACTGGAATCTGGAGTCCCTGACAGATTCAGTGGCAGTGGATCAGGGACAGATTTTACACTGAAAATCAGCAGAGTGGAGGCTGAGGATTTGGGAGTTTACTACTGCGTGCAAGGTACACATTTCCCTCATACGTTCGGATCGGGGACCAAGCTGGAAATAAAACGG	IGKV1-133*01	IGKJ2*03	18	92.3	93.9	92.2	100	95.4	95.7
51	S545	ND	Spleen	IgA	ATGATGGTGTTAAGTCTTCTGTACCTGTTGACAGCCCTTCCGGGTGTCCTGTCAGAGGTGCAGCTTCAGGAGTCAGGACCTGGCCTGGCAAAACCTTCTCAGACTCTGTCCCTCACCTGTTCTGTCACTGGCTACTCCATCACCAGTGATTACTGGAACTGGATCCGGAAATTCCCAGGGAATAAACTTGAGTACATGGGGTACATAAGCTACAGTGGTAGCACTTACTACAATCCATCTCTCAAAAGTCGAATCTCCATCACTCGAGACACATCCAAGAACCAGTATTACCTGCAGTTGAATTCTGTGACTACTGAGGACACAGCCACATATTACTGTGCAAGGTATTACTACGATGGTACCTACCATTATGCTTTGGACTACTGGGGTCAAGGAACC…	IGHV3-8*01	IGHD1-1*01,IGHD1-1*02	IGHJ4*01	2	100	100	100	100	99.1	87.5	ATGGAGACAGACACACTCCTGCTATGGGTGCTGCTGCTCTGGGTTCCAGACTCCAATGGTGACATTGTGCTGACCCAATCTCCAGCTTCTTTGGCTGTGTCTCTAGGGCAGAGGGCCACCATATCGTGCAAGGCCAGCCAGAGTATCAATTATTACGGTGATAATTATATGCACTGGTTCCAACAGAAACCAGGACAGCCAACCAAACTCCTTATCTATGATGCATCCAACCTAGAATCTGGAGTTCCTGACAGGTTCAGTGGCAGTGGGTCTGGGACAGACTTCACCCTCAACATCCATCCTGTGGAGGAGGAGGATGCTGCAACCTATTACTGTCACCAAAGCAAGGAGTTTCCGTGGACGTTCTGTGGAGGCACCAAGCTGGAAATCAAACGGGCT…	IGKV3-4*01	IGKJ1*01	26	97.4	76.7	92.2	88.9	93.5	75
52	SS206	ND	Spleen	IgA	ATGGCTGTCCTGGCGCTACTCCTCTGCCTGATGACTTTCCCAAGCTGTGCCCTGTCCCAGGTGCAGTTGAAGGAGTCAGGACCTGGCCTGGTGGCGCCCTCACAGAGCCTGTCCATCACATGCACTGTCTCTGGGTTCTCATTAAGCAACTATGCTATAAGCTGGGTTCGCCAGCCACCAGGAAAGGGTCTGGAGTGGCTTGGAGTAATATGGACTGGTGGAGGCACAAATTATAATTCAGCTCTCAAAACCAGACTGAGCATCAGCAAAGACAACTCCAGGAGTCAAGTTTTCTTAAAAATGAACAGTCTGCAAACTGATGACACAGCCAGGTACTACTGTGTCAGAAAAGCCTACTATAGTAACCCTTATGCTATGGACTACTGGGGTCAAGGAACC…	IGHV2-9-1*01	IGHD2-5*01,IGHD2-6*01	IGHJ4*01	6	98.7	91.7	100	100	98.2	87.5	ATGATGAGTCCTGCCCAGTTCCTGTTTCTGCTAGTGCTCTCGATTCAGGAAACCAGTGGTGATGTTGTGATGACCCAGACTCCACTCTCTTTGTCGGTTACCATTGGACAACCAGCCTCCATCTCTTGCAAGTCAAGTCAGAGCCTCTTACATAGTGATGGAAAGACATATTTGAATTGGTTATTACAGAGGCCAGGCCAGTCTCCAAAGCTCCTAATCTATCTGGTGTCTAAACTGGAATCTGGCATCCCTGACAGGTTCAGTGGCAGTGGATCAGGGACAGATTTCACACTGAAAATCAGTAGAGTGGAGGTTGAGGATTTGGGAGTTTATTACTGCTTGCAACAGACACATTTTCCGTGGACGTTCGGTGGAGGCACCAAGCTGGAAATCAAACGG	IGKV1-135*01	IGKJ1*01	15	98.7	97	96.1	100	93.5	80
53	SS224	ND	Spleen	IgG	ATGGGATGGAGCTGGATCTTTCTCTTTCTCCTGTCAGGAACTGCAGGTGTCCTCTCTGAGGTCCAGCTGCAACAGTCTGGACCTGAGCTGGTGAAGCCTGGGGATTCAGTGAAGATGTCCTGCAAGGCTTCTGGCTACACATTCACTGACTACAACATGGACTGGGTGAAGCAGAGCCATGGAAAGAGCCTTGAGTGGATTGGATATGTTTATCCTAACAATGGTGGCACTAACTTCAATCAGAAATTCAAGGGCAAGGCCACATTGACTGTAGACACGTCCTCCAGCACAGCCTACATGGAGCTCCACAGCCTGACATCTGAGGACTCTGCAGTCTATTACTGTGCAAGAAAGGATGATAGTTACTATAGTTCCTTTGCTTATTGGGGCCAAGGGACT…	IGHV1-34*02	IGHD2-12*01	IGHJ3*01	7	100	95.8	100	91.7	96.5	100	ATGAGTGTGCCCACTCAGGTCCTGGGGTTGCTGCTGCTGTGGCTTACAGGTGCCAGATGTGACATCCAGATGACTCAGTCTCCAGCCTCCCTATCTGCATCTGTGGGAGAAACTGTCACCATCACATGTCGACCAAGTGAGAATGTTTACAATAATTTAGCATGGTATCAGCAGAAACAGGGAAAGTCTCCTCAGCTCCTGGTCTATGCTGCAACAAATTTAGCAGATGGTGTGCCATCAAGGTTCAGTGGCAGTGGATCAGGCACACAGTTTTCTCTGAAGATCAACAGCCTGCAGCCTGAAGATTTTGGGACTTATTACTGTCAACATTTTTATGGTACTCCATGGACGTTCGGTGGAGGCACCAAGCTGGAAGTCAGACGG	IGKV12-46*01	IGKJ1*01	13	97.4	88.9	98	100	94.4	90
54	SS232	ND	Spleen	IgG	ATGGCTGTCCTGGCGCTACTCCTCTGCCTGATGACTTTCCCAAGCTGTGCCCTGTCCCAGGTGCAGCTGAAGGAGTCAGGACCTGGCCTGGTGGCGCCCTCACAGAGCCTGTCCATCACATGCACTGTCTCTGGGTTCCCATTAACCAACTATGCTATAAGCTGGATTCGCCAGCCACCAGGAAAGGGTCTGGAGTGGCTTGGAGTAATATGGACTGGTGGAGGCACAAATTATAATTCAGCTCTCAAATCCAGACTGAGCATCAGCAAAGACAACTCCAAGAGTCAAGTTTTCTTAAAAATGAACAGTCTGCAAACTGATGACGCAGCCAGGTACTACTGTGCCAGAATTGATTACTATACTTTCGACGTAAGAACTATGGACTACTGGGGTCAAGGA…	IGHV2-9-1*01	IGHD2-12*01	IGHJ4*01	4	100	91.7	98	100	99.1	100	ATGATGAGTCCTGCCCAGTTCCTGTTTCTGCTAGTGCTCTCGATTCAGGAAACAAATGGTGATGTTGTGATGACCCAGACTCCACTGTCTTTGTCGGTTACCATTGGACAACCAGCCTCCATCTCTTGCAAGTCAAGTCAGAGCCTCTTACATAGTGATGGAAAGACATATTTGAATTGGTTATTACAGAGGCCAGGCCAGTCTCCAAAGCTCCTAATCTATCTGGTGTCTAAACTGGAATCTGGCATCCCTGACAGGTTCAGTGGCAGTGGATCAGGGACAGATTTCACACTGAAAATCAGCAGAGTGGAGGTTGAGGATTTGGGAGTTTATTACTGCTTACAACATACACATTTTCCGTGGACGTTCGGTGGAGGCACCAAGCTGGAAATCAAACGG	IGKV1-135*01	IGKJ1*01	15	97.4	97	96.1	100	94.4	80

## Sheet: Sheet1
Group10 No.1	Nose VH mismatch	Nose VL	Spleen VH	Spleen VL
	14	9	16	9
	16	4	10	5
	14	4	13	6
	11	4	12	6
	13	6	14	6
	11	4	13	6
	11	4	14	3
	11	4	15	4
	14	6	14	7
	11	4	14	5
	11	4	11	3
	14	6	12	7
	13	7	14	4
	14	4	17	6
	14	5	15	4
	12	5	14	7
	16	4	13	7
	11	7	14	6
	11	5	12	3
	11	6	17	6
AV	12.7	5.1	11	5
SD	1.8	1.4	13	8
			14	5
			13	4
			15	8
			11	3
			17	6
			12	6
			12	6
			14	7
			13	4
			11	3
			11	4
			14	5
			14	6
		AV	13.4	5.4
		SD	1.8	1.6
